# Supplementary material
Source: PubMed Central journal article supplement (PMC8848543)
Supplement: mmc1.pdf [file mmc1.pdf]

## Online Supplementary Materials - Appendix A

According to Tables A1 and A2, about a quarter of the respondents lived alone, and half of the households were composed of two persons. In terms of health status, the prevalence of lung diseases, such as chronic bronchitis or emphysema, which are particularly relevant in the context of COVID-19, was around 9%. A very large proportion of the respondents suffered from hypertension and high cholesterol, which are two important risk factors for COVID-19 events. Nearly 10% of people reported the presence of other affective or emotional diseases. More than three quarters of the respondents were retired, whereas only 13% were still working; most households (79.6%) owned their house. In the two years before the outbreak, a small proportion of the respondents experienced stressful events, such as losing their spouses (2%), retiring (3.9%) or being diagnosed with severe chronic diseases (around 2.5%).

Table A3 shows the main characteristics of the sample during the outbreak. A large proportion of respondents (28.8%) had either no or less than once a week contact in person with their children, parents or friends; this proportion was much lower for electronic contacts (about 5.2% of the respondents). Almost 8% of the respondents said that someone close to them had tested positive for COVID-19. During the outbreak, 28.8% of the respondents reported receiving help from people outside their household, and this finding increased linearly with age (60% amongst people aged 85 or over). About 10% of the respondents experienced a major illness or health condition during the outbreak period. In our sample, more than three quarters had already retired from work, and a remarkable proportion of the interviewees (4%) lost their jobs during the first COVID-19 wave.

Table A1: Main characteristics at the beginning of the first wave of the COVID-19 outbreak of the final sample (37,475 units) - Dummy variables

|                                                                | Observed data |                | Missing data |                |
|----------------------------------------------------------------|---------------|----------------|--------------|----------------|
|                                                                | <i>n</i>      | % <sup>a</sup> | <i>n</i>     | % <sup>b</sup> |
| <i>Health status</i>                                           |               |                |              |                |
| Body Mass Index                                                |               |                | 12,671       | 33.8           |
| Normal weight or underweighted                                 | 8,753         | 35,3           |              |                |
| Overweighted                                                   | 10,262        | 41.4           |              |                |
| Obese                                                          | 5,789         | 23,3           |              |                |
| At least one ADL limitation                                    | 2,928         | 11.5           | 12,105       | 32.3           |
| At least one IADL limitation                                   | 4,947         | 19.5           | 12,105       | 32.3           |
| Ever diagnosed chronic lung diseases                           | 2,363         | 9,1            | 11,391       | 30.4           |
| Ever diagnosed diabetes                                        | 5,548         | 20.4           | 10,329       | 27.6           |
| Ever diagnosed hypertension                                    | 16,536        | 55.1           | 12,105       | 32.3           |
| Ever diagnosed cholesterol                                     | 10,003        | 35.2           | 9,013        | 24.1           |
| Ever diagnosed Alzheimer's disease                             | 686           | 2.7            | 11,916       | 31.8           |
| Ever diagnosed other affective diseases                        | 2,535         | 9.6            | 11,166       | 29.8           |
| Ever diagnosed rheumatoid arthritis                            | 3,751         | 14.0           | 10,733       | 28.6           |
| Ever diagnosed osteoarthritis                                  | 7,928         | 28.4           | 9,602        | 25.6           |
| <i>Social conditions</i>                                       |               |                |              |                |
| Living with a partner                                          | 25,577        | 68.3           | 0            | 0.0            |
| <i>Economic conditions</i>                                     |               |                |              |                |
| Job status                                                     |               |                | 5,064        | 13.5           |
| Employee                                                       | 3,528         | 10.9           |              |                |
| Self-employed                                                  | 756           | 2.3            |              |                |
| Retired                                                        | 24,887        | 76.8           |              |                |
| Other (unemployed, permanently sick,...)                       | 1,232         | 3.8            |              |                |
| Homemaker                                                      | 2,008         | 6.2            |              |                |
| House ownership                                                |               |                | 12,669       | 33.8           |
| Owner/Member of a cooperative                                  | 19,744        | 79.6           |              |                |
| Tenant/Subtenant                                               | 3,313         | 13.4           |              |                |
| Rent free                                                      | 1,749         | 7.0            |              |                |
| <i>Events in the 2 years before starting COVID-19 outbreak</i> |               |                |              |                |
| Become widow/er                                                | 514           | 2.0            | 12,105       | 32.3           |
| Retired                                                        | 1,249         | 3.9            | 5,054        | 13.5           |
| Had a heart attack or stroke                                   | 684           | 2.7            | 12,105       | 32.3           |
| Diagnosed a cancer                                             | 604           | 2.4            | 12,105       | 32.3           |

<sup>a</sup> Calculated with respect to the total observed data in the corresponding variable

<sup>b</sup> Calculated with respect to the size of the final sample (37,475 units)

Notes: ADL = Activity of Daily Living; IADL = Instrumental Activity of Daily Living

Table A2: Main characteristics at the beginning of the first wave of the COVID-19 outbreak of the final sample (37,475 units) - Continuous variables

|                           | Observed data              |      |     |     | Missing data |                |
|---------------------------|----------------------------|------|-----|-----|--------------|----------------|
|                           | Mean <sup>a</sup>          | S.D. | Min | Max | <i>n</i>     | % <sup>b</sup> |
|                           | <i>Cognitive abilities</i> |      |     |     |              |                |
| Fluency test score        | 20.85                      | 7.58 | 1   | 60  | 12,645       | 33.7           |
|                           | <i>Social conditions</i>   |      |     |     |              |                |
| Household size            | 2.01                       | 0.92 | 1   | 12  | 0            | 0.0            |
| Number of living children | 2.02                       | 1.30 | 0   | 13  | 11,064       | 29.5           |

<sup>a</sup> Calculated with respect to the total observed data in the corresponding variable

<sup>b</sup> Calculated with respect to the size of the final sample (37,475 units)

Table A3: Main characteristics during the first wave of the COVID-19 outbreak of the final sample (37,475 units) - No missing data

|                                                     | <i>n</i> | %    |
|-----------------------------------------------------|----------|------|
| Anyone in the hh tested positive for COVID-19       | 3,155    | 8.4  |
| Anyone in the hh tested negative for COVID-19       | 8,217    | 21.9 |
| Anyone in the hh hospitalised because infection     | 1,578    | 4.2  |
| Anyone in the hh died because infection             | 1,180    | 3.2  |
| Never/rarely personal contacts with people          | 10,808   | 28.8 |
| Never/rarely electronic contacts with people        | 1,962    | 5.2  |
| Helped others outside home                          | 5,728    | 15.3 |
| Were helped by others outside home                  | 10,780   | 28.8 |
| Received additional financial support               | 3,518    | 9.4  |
| Become unemployed/were laid off                     | 1,493    | 4.0  |
| Never left home since the outbreak begin            | 6,408    | 17.1 |
| Diagnosed with major illness since wave 8 interview | 4,063    | 10.8 |

*Note:* hh = household

Table A4: Estimates of Models I and II on the probability of reporting to be sadder/more depressed during the first wave of the COVID-19 pandemic than before the outbreak: Average Marginal Effects (AMEs) and their confidence intervals (CI) at the 95% level in multiple imputed dataset

| Variable                                       | Model I                               |                                         |  | Model II                              |                                         |  |
|------------------------------------------------|---------------------------------------|-----------------------------------------|--|---------------------------------------|-----------------------------------------|--|
|                                                | Males (15,538 units)<br>AME<br>CI 95% | Females (21,937 units)<br>AME<br>CI 95% |  | Males (15,538 units)<br>AME<br>CI 95% | Females (21,937 units)<br>AME<br>CI 95% |  |
| <i>Age (at 2020)</i>                           |                                       |                                         |  |                                       |                                         |  |
| < 60                                           | ref.                                  | ref.                                    |  | ref.                                  | ref.                                    |  |
| 60-64                                          | -0.002<br>[-0.022 0.019]              | 0.007<br>[-0.013 0.026]                 |  | -0.007<br>[-0.030 0.017]              | -0.004<br>[-0.026 0.017]                |  |
| 65-69                                          | -0.008<br>[-0.028 0.012]              | 0.004<br>[-0.015 0.023]                 |  | -0.017<br>[-0.043 0.009]              | -0.014<br>[-0.038 0.011]                |  |
| 70-74                                          | 0.001<br>[-0.020 0.020]               | 0.019<br>[-0.001 0.038]                 |  | -0.011<br>[-0.038 0.016]              | -0.004<br>[-0.031 0.022]                |  |
| 75-79                                          | -0.002<br>[-0.023 0.019]              | 0.019<br>[-0.001 0.040]                 |  | -0.017<br>[-0.045 0.011]              | -0.010<br>[-0.038 0.018]                |  |
| 80-84                                          | 0.043<br>[0.020 0.067]                | 0.034<br>[0.012 0.056]                  |  | 0.020<br>[-0.010 0.051]               | -0.001<br>[-0.031 0.029]                |  |
| > 84                                           | 0.025<br>[0.000 0.050]                | 0.012<br>[-0.011 0.034]                 |  | -0.005<br>[-0.036 0.026]              | -0.031<br>[-0.062 0.000]                |  |
| <i>Education</i>                               |                                       |                                         |  |                                       |                                         |  |
| Low                                            | ref.                                  | ref.                                    |  | ref.                                  | ref.                                    |  |
| Middle                                         | -0.019<br>[-0.032 -0.005]             | -0.014<br>[-0.027 -0.001]               |  | -0.015<br>[-0.028 -0.001]             | -0.008<br>[-0.022 0.005]                |  |
| High                                           | -0.021<br>[-0.034 -0.007]             | -0.019<br>[-0.033 -0.004]               |  | -0.013<br>[-0.026 0.001]              | -0.009<br>[-0.025 0.007]                |  |
| <i>Depression categories (at 2015)</i>         |                                       |                                         |  |                                       |                                         |  |
| Very low risk of depression                    | ref.                                  | ref.                                    |  | ref.                                  | ref.                                    |  |
| Low risk of depression                         | 0.030<br>[0.001 0.060]                | 0.061<br>[0.020 0.102]                  |  | 0.027<br>[-0.002 0.057]               | 0.053<br>[0.012 0.094]                  |  |
| Middle risk of depression                      | 0.054<br>[0.038 0.070]                | 0.079<br>[0.066 0.093]                  |  | 0.050<br>[0.034 0.066]                | 0.075<br>[0.061 0.089]                  |  |
| High risk of depression                        | 0.054<br>[0.041 0.065]                | 0.102<br>[0.090 0.115]                  |  | 0.043<br>[0.032 0.055]                | 0.089<br>[0.077 0.102]                  |  |
| Depressed                                      | 0.080<br>[0.043 0.117]                | 0.123<br>[0.087 0.159]                  |  | 0.067<br>[0.031 0.104]                | 0.107<br>[0.072 0.143]                  |  |
| Severely depressed                             | 0.183<br>[0.132 0.233]                | 0.198<br>[0.165 0.232]                  |  | 0.146<br>[0.099 0.194]                | 0.162<br>[0.129 0.196]                  |  |
| Extremely depressed                            | 0.145<br>[0.035 0.256]                | 0.207<br>[0.133 0.281]                  |  | 0.094<br>[-0.001 0.189]               | 0.169<br>[0.096 0.241]                  |  |
| Become widow/er (closed to outbreak)           | -                                     | -                                       |  | 0.010<br>[-0.032 0.053]               | 0.011<br>[-0.022 0.044]                 |  |
| Retired (closed to outbreak)                   | -                                     | -                                       |  | 0.005<br>[-0.030 0.041]               | 0.012<br>[-0.021 0.046]                 |  |
| Had a heart attack/stroke (closed to outbreak) | -                                     | -                                       |  | 0.022<br>[-0.006 0.049]               | -0.004<br>[-0.046 0.038]                |  |
| Diagnosed a cancer (closed to outbreak)        | -                                     | -                                       |  | 0.010<br>[-0.025 0.046]               | 0.032<br>[-0.013 0.076]                 |  |
| Ever diagnosed chronic lung disease            | -                                     | -                                       |  | 0.009<br>[-0.010 0.029]               | 0.013<br>[-0.009 0.033]                 |  |
| Ever diagnosed diabetes                        | -                                     | -                                       |  | -0.003<br>[-0.015 0.010]              | 0.000<br>[-0.009 0.034]                 |  |
| Ever diagnosed hypertension                    | -                                     | -                                       |  | 0.001<br>[-0.010 0.012]               | 0.012<br>[0.000 0.024]                  |  |
| Ever diagnosed cholesterol                     | -                                     | -                                       |  | -0.005<br>[-0.018 0.008]              | 0.001<br>[-0.016 0.018]                 |  |
| Ever diagnosed Alzheimer's disease             | -                                     | -                                       |  | -0.020<br>[-0.056 0.016]              | -0.034<br>[-0.068 0.000]                |  |
| Ever diagnosed other affective diseases        | -                                     | -                                       |  | 0.042<br>[0.019 0.065]                | 0.053<br>[0.035 0.071]                  |  |
| Ever diagnosed rheumatoid arthritis            | -                                     | -                                       |  | -0.004<br>[-0.021 0.012]              | 0.009<br>[-0.008 0.025]                 |  |
| Ever diagnosed osteoarthritis                  | -                                     | -                                       |  | 0.024<br>[0.009 0.040]                | 0.018<br>[0.004 0.031]                  |  |

Table A4 (cont.)

| Variable                                 | Model I                     |                                         | Model II                              |                                         |
|------------------------------------------|-----------------------------|-----------------------------------------|---------------------------------------|-----------------------------------------|
|                                          | Males (15,538 units)<br>AME | Females (21,937 units)<br>AME<br>CI 95% | Males (15,538 units)<br>AME<br>CI 95% | Females (21,937 units)<br>AME<br>CI 95% |
| At least one ADL limitation              | -                           | -                                       | 0.000<br>[-0.022 0.021]               | 0.005<br>[-0.014 0.024]                 |
| At least one IADL limitation             | -                           | -                                       | 0.031<br>[ 0.012 0.051]               | 0.021<br>[-0.007 0.047]                 |
| <i>Body Mass Index</i>                   |                             |                                         |                                       |                                         |
| Normal weight/underweighted              | -                           | -                                       | ref.                                  | ref.                                    |
| Being overweight                         | -                           | -                                       | -0.005<br>[-0.017 0.007]              | -0.002<br>[-0.017 0.013]                |
| Being obese                              | -                           | -                                       | 0.001<br>[-0.013 0.016]               | -0.013<br>[-0.028 0.001]                |
| Fluency test score                       | -                           | -                                       | 0.000<br>[-0.001 0.001]               | -0.001<br>[-0.002 0.000]                |
| Household size                           | -                           | -                                       | -0.007<br>[-0.014 0.000]              | -0.020<br>[-0.027 -0.012]               |
| Living with a partner                    | -                           | -                                       | 0.000<br>[-0.019 0.011]               | 0.010<br>[-0.004 0.024]                 |
| <i>Number of living children</i>         |                             |                                         |                                       |                                         |
| None                                     | -                           | -                                       | ref.                                  | ref.                                    |
| One                                      | -                           | -                                       | 0.021<br>[ 0.000 0.043]               | 0.026<br>[ 0.006 0.047]                 |
| More than one                            | -                           | -                                       | 0.019<br>[ 0.001 0.038]               | 0.022<br>[ 0.004 0.039]                 |
| <i>Job status</i>                        |                             |                                         |                                       |                                         |
| Employee                                 | -                           | -                                       | ref.                                  | ref.                                    |
| Self-employed                            | -                           | -                                       | 0.019<br>[-0.018 0.055]               | -0.033<br>[-0.091 0.026]                |
| Retired                                  | -                           | -                                       | 0.012<br>[-0.013 0.038]               | 0.002<br>[-0.025 0.030]                 |
| Other (unemployed, permanently sick,...) | -                           | -                                       | 0.021<br>[-0.011 0.053]               | 0.005<br>[-0.027 0.036]                 |
| Homemaker                                | -                           | -                                       | 0.027<br>[-0.089 0.144]               | 0.002<br>[-0.031 0.035]                 |
| <i>House ownership</i>                   |                             |                                         |                                       |                                         |
| Owner/Member of a cooperative            | -                           | -                                       | ref.                                  | ref.                                    |
| Tenant/Subtenant                         | -                           | -                                       | 0.021<br>[ 0.001 0.042]               | 0.027<br>[ 0.008 0.046]                 |
| Rent free                                | -                           | -                                       | 0.007<br>[-0.016 0.030]               | 0.014<br>[-0.012 0.040]                 |

Notes: ADL = Activity of Daily Living; IADL = Instrumental Activity of Daily Living.

Table A5: Weighted Model III estimates on the probability of reporting to be sadder/more depressed during the first wave of the COVID-19 pandemic than before the outbreak: Average Marginal Effects (AMEs) and their confidence intervals (CI) at the 95% level

| Variable                                       | Excluding any item non-responses<br>Males (9,960 units) |                | Including the first round of imputations<br>Males (15,538 units) |                | Females (21,937 units) |                |
|------------------------------------------------|---------------------------------------------------------|----------------|------------------------------------------------------------------|----------------|------------------------|----------------|
|                                                | AME                                                     | CI 95%         | AME                                                              | CI 95%         | AME                    | CI 95%         |
| <i>Age (at 2020)</i>                           |                                                         |                |                                                                  |                |                        |                |
| < 60                                           | ref.                                                    |                | ref.                                                             |                | ref.                   |                |
| 60-64                                          | 0.020                                                   | [-0.011 0.051] | -0.001                                                           | [-0.030 0.027] | -0.005                 | [-0.026 0.017] |
| 65-69                                          | -0.003                                                  | [-0.036 0.030] | -0.017                                                           | [-0.049 0.015] | -0.012                 | [-0.036 0.012] |
| 70-74                                          | -0.011                                                  | [-0.045 0.024] | -0.020                                                           | [-0.054 0.013] | -0.006                 | [-0.031 0.020] |
| 75-79                                          | -0.009                                                  | [-0.044 0.026] | -0.030                                                           | [-0.065 0.005] | -0.016                 | [-0.043 0.012] |
| 80-84                                          | 0.011                                                   | [-0.027 0.049] | -0.023                                                           | [0.060 0.015]  | -0.007                 | [-0.036 0.022] |
| >84                                            | -0.014                                                  | [-0.053 0.025] | -0.039                                                           | [-0.079 0.000] | -0.036                 | [-0.066 0.005] |
| <i>Education</i>                               |                                                         |                |                                                                  |                |                        |                |
| Low                                            | ref.                                                    |                | ref.                                                             |                | ref.                   |                |
| Middle                                         | -0.023                                                  | [-0.039 0.006] | -0.001                                                           | [-0.018 0.016] | -0.010                 | [-0.023 0.004] |
| High                                           | -0.012                                                  | [-0.030 0.006] | 0.000                                                            | [-0.019 0.019] | -0.010                 | [-0.026 0.005] |
| <i>Depression categories (at 2015)</i>         |                                                         |                |                                                                  |                |                        |                |
| Very low risk of depression                    | ref.                                                    |                | ref.                                                             |                | ref.                   |                |
| Low risk of depression                         | 0.028                                                   | [-0.010 0.066] | 0.056                                                            | [0.002 0.111]  | 0.054                  | [0.012 0.096]  |
| Middle risk of depression                      | 0.054                                                   | [0.034 0.074]  | 0.080                                                            | [0.062 0.098]  | 0.071                  | [0.057 0.085]  |
| High risk of depression                        | 0.036                                                   | [0.022 0.050]  | 0.089                                                            | [0.073 0.105]  | 0.086                  | [0.074 0.099]  |
| Depressed                                      | 0.080                                                   | [0.031 0.128]  | 0.076                                                            | [0.036 0.117]  | 0.101                  | [0.066 0.137]  |
| Severely depressed                             | 0.098                                                   | [0.045 0.150]  | 0.173                                                            | [0.129 0.217]  | 0.159                  | [0.125 0.192]  |
| Extremely depressed                            | 0.108                                                   | [-0.011 0.228] | 0.179                                                            | [0.082 0.277]  | 0.158                  | [0.087 0.229]  |
| Become widow/er (closed to outbreak)           | -0.018                                                  | [-0.082 0.046] | 0.004                                                            | [-0.050 0.058] | 0.020                  | [-0.019 0.048] |
| Retired (closed to outbreak)                   | -0.016                                                  | [-0.043 0.011] | -0.011                                                           | [-0.043 0.021] | -0.010                 | [-0.007 0.049] |
| Had a heart attack/stroke (closed to outbreak) | 0.032                                                   | [-0.004 0.068] | 0.002                                                            | [-0.043 0.047] | 0.022                  | [-0.034 0.033] |
| Diagnosed a cancer (closed to outbreak)        | 0.004                                                   | [-0.033 0.041] | 0.044                                                            | [-0.006 0.094] | 0.001                  | [-0.005 0.082] |
| Ever diagnosed chronic lung disease            | 0.016                                                   | [-0.008 0.039] | 0.011                                                            | [-0.016 0.037] | 0.010                  | [-0.013 0.024] |
| Ever diagnosed diabetes                        | -0.010                                                  | [-0.026 0.006] | 0.003                                                            | [-0.017 0.023] | -0.003                 | [-0.016 0.013] |
| Ever diagnosed hypertension                    | 0.000                                                   | [-0.013 0.012] | 0.020                                                            | [0.005 0.034]  | 0.010                  | [-0.002 0.022] |
| Ever diagnosed cholesterol                     | 0.004                                                   | [-0.010 0.018] | 0.013                                                            | [-0.002 0.029] | 0.000                  | [-0.012 0.012] |
| Ever diagnosed Alzheimer's disease             | 0.012                                                   | [-0.042 0.066] | 0.011                                                            | [-0.045 0.068] | -0.021                 | [-0.056 0.003] |
| Ever diagnosed other affective diseases        | 0.088                                                   | [0.048 0.128]  | 0.079                                                            | [0.052 0.107]  | 0.041                  | [0.017 0.064]  |
| Ever diagnosed rheumatoid arthritis            | 0.001                                                   | [-0.024 0.026] | 0.016                                                            | [-0.005 0.037] | -0.009                 | [-0.009 0.020] |
| Ever diagnosed osteoarthritis                  | 0.030                                                   | [0.011 0.050]  | 0.022                                                            | [0.006 0.037]  | 0.025                  | [0.010 0.039]  |

Table A5 (cont.)

| Variable                                       | Excluding any item non-responses     |                                         |        | Including the first round of imputations |                                         |                |        |                 |
|------------------------------------------------|--------------------------------------|-----------------------------------------|--------|------------------------------------------|-----------------------------------------|----------------|--------|-----------------|
|                                                | Males (9,960 units)<br>AME<br>CI 95% | Females (13,910 units)<br>AME<br>CI 95% |        | Males (15,538 units)<br>AME<br>CI 95%    | Females (21,937 units)<br>AME<br>CI 95% |                |        |                 |
| At least one ADL limitation                    | -0.007                               | [-0.029 0.015]                          | 0.009  | [-0.015 0.033]                           | -0.007                                  | [-0.024 0.010] | 0.002  | [-0.016 0.021]  |
| At least one IADL limitation                   | 0.031                                | [0.009 0.054]                           | 0.015  | [-0.004 0.035]                           | 0.033                                   | [0.015 0.050]  | 0.012  | [-0.004 0.027]  |
| <i>Body Mass Index</i>                         |                                      |                                         |        |                                          |                                         |                |        |                 |
| Normal weight/underweighted                    | ref.                                 |                                         | ref.   |                                          | ref.                                    |                | ref.   |                 |
| Being overweight                               | -0.017                               | [-0.031 -0.002]                         | -0.001 | [-0.017 0.014]                           | -0.006                                  | [-0.018 0.006] | -0.007 | [-0.019 0.006]  |
| Being obese                                    | -0.005                               | [-0.023 0.013]                          | -0.028 | [-0.046 -0.010]                          | 0.003                                   | [-0.012 0.018] | -0.019 | [-0.034 -0.005] |
| Fluency test score (cognitive abilities)       | -0.001                               | [-0.002 0.000]                          | -0.001 | [-0.002 0.000]                           | 0.000                                   | [-0.001 0.001] | -0.001 | [-0.002 -0.001] |
| Household size                                 | -0.005                               | [-0.013 0.004]                          | -0.015 | [-0.024 -0.005]                          | -0.005                                  | [-0.012 0.002] | -0.015 | [-0.022 -0.007] |
| Living with a partner                          | -0.012                               | [-0.032 0.008]                          | 0.020  | [0.003 0.037]                            | -0.007                                  | [-0.023 0.009] | 0.010  | [-0.004 0.025]  |
| <i>Number of living children</i>               |                                      |                                         |        |                                          |                                         |                |        |                 |
| None                                           | ref.                                 |                                         | ref.   |                                          | ref.                                    |                | ref.   |                 |
| One                                            | 0.018                                | [-0.007 0.042]                          | 0.020  | [-0.008 0.047]                           | 0.015                                   | [-0.004 0.034] | 0.021  | [0.001 0.041]   |
| More than one                                  | 0.013                                | [-0.008 0.035]                          | -0.003 | [-0.027 0.022]                           | 0.010                                   | [-0.007 0.027] | 0.016  | [-0.002 0.034]  |
| <i>Job status</i>                              |                                      |                                         |        |                                          |                                         |                |        |                 |
| Employee                                       | ref.                                 |                                         | ref.   |                                          | ref.                                    |                | ref.   |                 |
| Self-employed                                  | 0.024                                | [-0.006 0.053]                          | -0.044 | [-0.089 0.001]                           | 0.008                                   | [-0.020 0.037] | -0.030 | [-0.072 0.011]  |
| Retired                                        | 0.034                                | [0.012 0.057]                           | 0.018  | [-0.009 0.032]                           | 0.012                                   | [-0.009 0.032] | -0.002 | [-0.024 0.020]  |
| Other (unemployed, permanently sick,...)       | 0.032                                | [0.001 0.062]                           | 0.008  | [-0.026 0.042]                           | 0.015                                   | [-0.014 0.044] | 0.010  | [-0.020 0.039]  |
| Homemaker                                      | 0.070                                | [-0.046 0.189]                          | 0.004  | [-0.025 0.032]                           | 0.015                                   | [-0.080 0.110] | 0.006  | [-0.019 0.031]  |
| <i>House ownership</i>                         |                                      |                                         |        |                                          |                                         |                |        |                 |
| Owner/Member of a cooperative                  | ref.                                 |                                         | ref.   |                                          | ref.                                    |                | ref.   |                 |
| Tenant/Subtenant                               | 0.023                                | [-0.002 0.044]                          | 0.028  | [0.007 0.049]                            | 0.024                                   | [0.006 0.041]  | 0.029  | [0.012 0.046]   |
| Rent free                                      | -0.007                               | [-0.035 0.020]                          | 0.012  | [-0.014 0.038]                           | 0.000                                   | [-0.023 0.023] | 0.004  | [-0.016 0.025]  |
| Anyone in the hh tested positive for COVID-19  | 0.004                                | [-0.021 0.029]                          | -0.004 | [-0.030 0.026]                           | 0.003                                   | [-0.017 0.023] | 0.006  | [-0.015 0.028]  |
| Anyone in the hh tested negative for COVID-19  | 0.033                                | [0.015 0.051]                           | 0.032  | [0.014 0.050]                            | 0.031                                   | [0.017 0.045]  | 0.046  | [0.032 0.060]   |
| Anyone in the hh hospitalised due to infection | 0.018                                | [-0.018 0.055]                          | -0.003 | [-0.041 0.036]                           | 0.025                                   | [-0.005 0.055] | 0.004  | [-0.026 0.035]  |
| Anyone in the hh died because infection        | 0.023                                | [-0.015 0.061]                          | 0.055  | [0.007 0.102]                            | 0.026                                   | [-0.004 0.056] | 0.041  | [0.006 0.077]   |
| Never/rarely personal contacts                 | 0.004                                | [-0.010 0.018]                          | 0.016  | [0.002 0.031]                            | 0.023                                   | [0.012 0.035]  | 0.029  | [0.017 0.041]   |
| Never/rarely electronic contacts               | -0.004                               | [-0.028 0.019]                          | -0.089 | [-0.120 -0.059]                          | -0.006                                  | [-0.025 0.013] | -0.082 | [-0.105 -0.058] |
| Helped others outside home                     | 0.011                                | [-0.008 0.030]                          | 0.013  | [-0.007 0.032]                           | 0.003                                   | [-0.013 0.018] | 0.016  | [0.000 0.032]   |
| Were helped by others outside home             | 0.036                                | [0.019 0.052]                           | 0.063  | [0.047 0.079]                            | 0.047                                   | [0.033 0.061]  | 0.069  | [0.056 0.082]   |
| Received additional financial support          | 0.018                                | [-0.011 0.048]                          | 0.027  | [-0.003 0.058]                           | 0.012                                   | [-0.011 0.034] | 0.025  | [0.001 0.049]   |
| Become unemployed/were laid off                | 0.054                                | [0.013 0.095]                           | 0.021  | [-0.018 0.061]                           | 0.060                                   | [-0.027 0.093] | 0.020  | [-0.010 0.051]  |
| Never left home since outbreak                 | -0.004                               | [-0.022 0.014]                          | 0.002  | [-0.017 0.021]                           | 0.002                                   | [-0.012 0.016] | -0.004 | [-0.018 0.011]  |
| Diagnosed major illness since wave 8           | 0.099                                | [0.069 0.128]                           | 0.105  | [0.077 0.132]                            | 0.089                                   | [0.069 0.109]  | 0.086  | [0.067 0.104]   |

Notes: Inverse-probability weights for each unit are used. ADL = Activity of Daily Living; IADL = Instrumental Activity of Daily Living; hh = household.

Table A6: Statistical power of the estimates of models III on the probability of reporting to be sadder/more depressed during the first wave of the COVID-19 pandemic than before the outbreak: simulation results

| Variable                                       | Males<br>(15,538 units) | Females<br>(21,937 units) |
|------------------------------------------------|-------------------------|---------------------------|
| <i>Age (at 2020)</i>                           |                         |                           |
| < 60                                           | ref.                    | ref.                      |
| 60-64                                          | 0.062                   | 0.070                     |
| 65-69                                          | 0.148                   | 0.185                     |
| 70-74                                          | 0.090                   | 0.090                     |
| 75-79                                          | 0.239                   | 0.238                     |
| 80-84                                          | 0.176                   | 0.096                     |
| >84                                            | 0.087                   | 0.717                     |
| <i>Education</i>                               |                         |                           |
| Low                                            | ref.                    | ref.                      |
| Middle                                         | 0.662                   | 0.277                     |
| High                                           | 0.600                   | 0.251                     |
| <i>Depression categories (at 2015)</i>         |                         |                           |
| Very low risk of depression                    | ref.                    | ref.                      |
| Low risk of depression                         | 0.512                   | 0.755                     |
| Middle risk of depression                      | 1.000                   | 1.000                     |
| High risk of depression                        | 1.000                   | 1.000                     |
| Depressed                                      | 0.963                   | 1.000                     |
| Severely depressed                             | 1.000                   | 1.000                     |
| Extremely depressed                            | 0.442                   | 0.999                     |
| Become widow/er (closed to outbreak)           | 0.098                   | 0.116                     |
| Retired (closed to outbreak)                   | 0.105                   | 0.303                     |
| Had a heart attack/stroke (closed to outbreak) | 0.312                   | 0.079                     |
| Diagnosed a cancer (closed to outbreak)        | 0.050                   | 0.498                     |
| Ever diagnosed chronic lung disease            | 0.105                   | 0.060                     |
| Ever diagnosed diabetes                        | 0.313                   | 0.106                     |
| Ever diagnosed hypertension                    | 0.055                   | 0.415                     |
| Ever diagnosed cholesterol                     | 0.115                   | 0.050                     |
| Ever diagnosed Alzheimer's disease             | 0.300                   | 0.569                     |
| Ever diagnosed other affective diseases        | 0.946                   | 0.999                     |
| Ever diagnosed rheumatoid arthritis            | 0.157                   | 0.115                     |
| Ever diagnosed osteoarthritis                  | 0.888                   | 0.685                     |
| At least one ADL limitation                    | 0.131                   | 0.065                     |
| At least one IADL limitation                   | 0.934                   | 0.377                     |
| <i>Body Mass Index</i>                         |                         |                           |
| Normal weight/underweighted                    | ref.                    | ref.                      |
| Being overweighted                             | 0.165                   | 0.279                     |
| Being obese                                    | 0.089                   | 0.791                     |



Table A6 (cnt.)

| Variable                                       | Males<br>(15,538 units) | Females<br>(21,937 units) |
|------------------------------------------------|-------------------------|---------------------------|
| Fluency test score                             | 0.074                   | 0.931                     |
| Household size                                 | 0.241                   | 0.943                     |
| Living with a partner                          | 0.154                   | 0.194                     |
| <i>Number of living children</i>               |                         |                           |
| None                                           | ref.                    | ref.                      |
| One                                            | 0.444                   | 0.513                     |
| More than one                                  | 0.301                   | 0.361                     |
| <i>Job status</i>                              |                         |                           |
| Employee                                       | ref.                    | ref.                      |
| Self-employed                                  | 0.066                   | 0.272                     |
| Retired                                        | 0.163                   | 0.053                     |
| Other (unemployed, permanently sick,...)       | 0.164                   | 0.099                     |
| Homemaker                                      | 0.078                   | 0.067                     |
| <i>House ownership</i>                         |                         |                           |
| Owner/Member of a cooperative                  | ref.                    | ref.                      |
| Tenant/Subtenant                               | 0.836                   | 0.930                     |
| Rent free                                      | 0.056                   | 0.053                     |
| Anyone in the hh tested positive for COVID-19  | 0.057                   | 0.063                     |
| Anyone in the hh tested negative for COVID-19  | 0.992                   | 1.000                     |
| Anyone in the hh hospitalised due to infection | 0.431                   | 0.080                     |
| Anyone in the hh died because infection        | 0.436                   | 0.538                     |
| Never/rarely personal contacts                 | 0.977                   | 0.996                     |
| Never/rarely electronic contacts               | 0.111                   | 1.000                     |
| Helped others outside home                     | 0.071                   | 0.538                     |
| Were helped by others outside home             | 1.000                   | 1.000                     |
| Received additional financial support          | 0.187                   | 0.527                     |
| Become unemployed/were laid off                | 0.976                   | 0.280                     |
| Never left home since outbreak                 | 0.069                   | 0.085                     |
| Diagnosed major illness since wave 8           | 1.000                   | 1.000                     |

*Notes:* ADL = Activity of Daily Living; IADL = Instrumental Activity of Daily Living;  
hh = household.
