# Supplementary material
Source: PubMed Central journal article supplement (PMC8848543)
Supplement: mmc3.pdf [file mmc3.pdf]

## Online Supplementary Materials - Appendix C

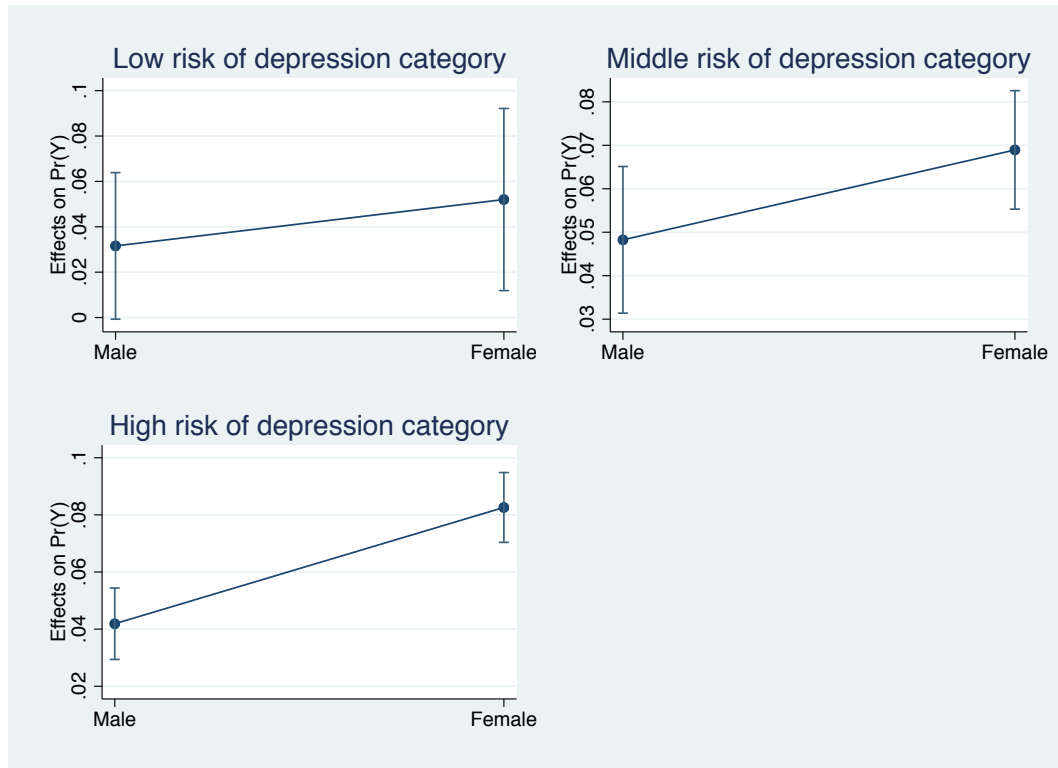

Figure C1: Comparison of marginal effects for men and women with respect to some depression categories, after Model IV estimation

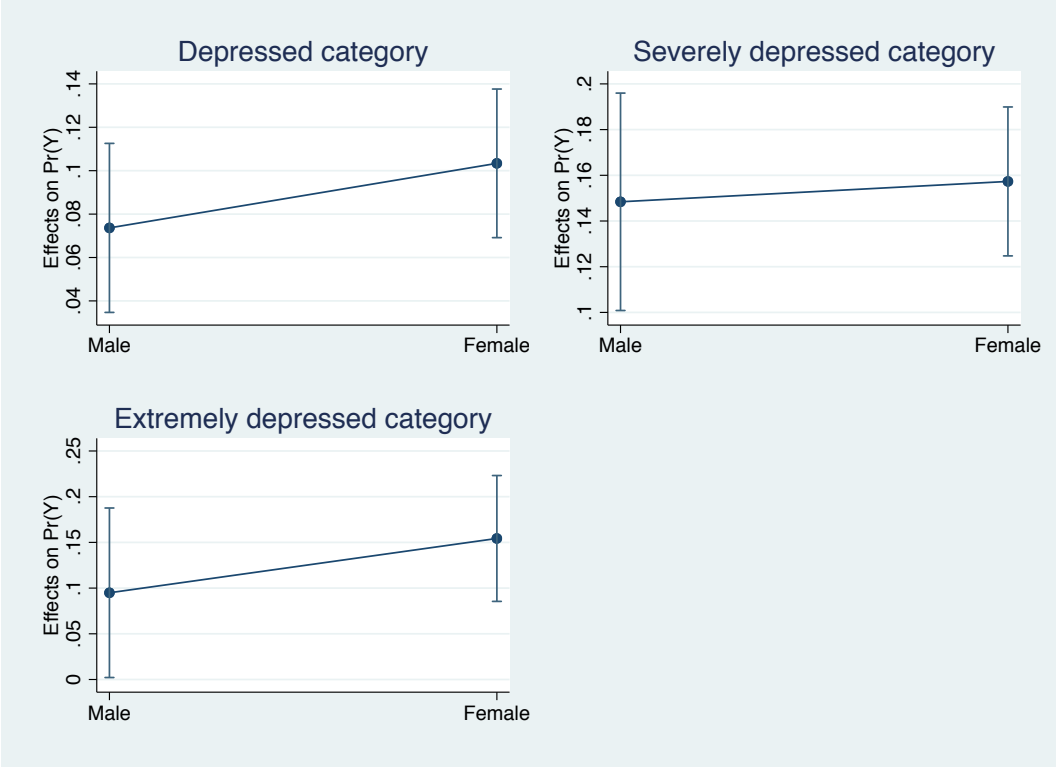

Figure C2: Comparison of marginal effects for men and women with respect to some depression categories, after Model IV estimation

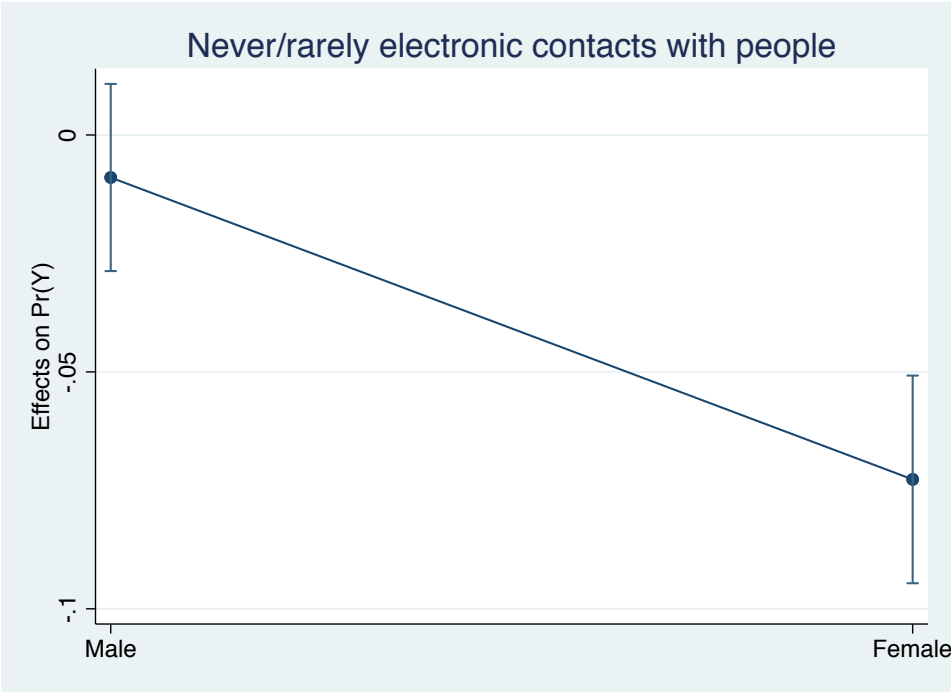

Figure C3: Comparison of marginal effects for men and women with respect to having never or rarely electronic contacts with people, after Model IV estimation
