# Supplementary material
Source: PubMed Central journal article supplement (PMC8848543)
Supplement: mmc4.pdf [file mmc4.pdf]

## MODEL ESTIMATION: MALES

MODEL I

|                               |                 |   |          |
|-------------------------------|-----------------|---|----------|
| Multiple-imputation estimates | Imputations     | = | 5        |
| Logistic regression           | Number of obs   | = | 15,538   |
|                               | Average RVI     | = | 0.0000   |
|                               | Largest FMI     | = | 0.0000   |
| DF adjustment: Large sample   | DF: min         | = | 1.22e+61 |
|                               | avg             | = | 1.01e+69 |
|                               | max             | = | .        |
| Model F test: Equal FMI       | F( 30, 1.3e+64) | = | 18.10    |
| Within VCE type: Robust       | Prob > F        | = | 0.0000   |

| dep_by_covid        | Coef.     | Std. Err. | t      | P> t  | [95% Conf. Interval] |           |
|---------------------|-----------|-----------|--------|-------|----------------------|-----------|
| -----               |           |           |        |       |                      |           |
| age_cat             |           |           |        |       |                      |           |
| 60-64               | -.0175856 | .118075   | -0.15  | 0.882 | -.2490082            | .2138371  |
| 65-69               | -.0924087 | .1150491  | -0.80  | 0.422 | -.3179009            | .1330834  |
| 70-74               | .0020198  | .1135727  | 0.02   | 0.986 | -.2205787            | .2246182  |
| 75-79               | -.0264292 | .1193364  | -0.22  | 0.825 | -.2603243            | .2074659  |
| 80-84               | .4112554  | .1186764  | 3.47   | 0.001 | .178654              | .6438568  |
| >84                 | .2538541  | .128882   | 1.97   | 0.049 | .00125               | .5064581  |
| -----               |           |           |        |       |                      |           |
| education           |           |           |        |       |                      |           |
| Middle              | -.1921332 | .0699019  | -2.75  | 0.006 | -.3291383            | -.0551281 |
| High                | -.2166551 | .0715195  | -3.03  | 0.002 | -.3568308            | -.0764795 |
| -----               |           |           |        |       |                      |           |
| dep_cat_AS          |           |           |        |       |                      |           |
| Low risk            | .3602495  | .1583859  | 2.27   | 0.023 | .0498188             | .6706803  |
| Middle risk         | .5868656  | .0782565  | 7.50   | 0.000 | .4334857             | .7402455  |
| High risk           | .5791024  | .0615391  | 9.41   | 0.000 | .4584879             | .6997169  |
| Depressed           | .8007297  | .1502307  | 5.33   | 0.000 | .506283              | 1.095176  |
| Severely depressed  | 1.449337  | .1438159  | 10.08  | 0.000 | 1.167463             | 1.731211  |
| Extremely depressed | 1.238228  | .337746   | 3.67   | 0.000 | .576258              | 1.900198  |
| -----               |           |           |        |       |                      |           |
| country             |           |           |        |       |                      |           |
| Germany             | .3447016  | .1759634  | 1.96   | 0.050 | -.0001803            | .6895835  |
| Sweden              | .2816695  | .206868   | 1.36   | 0.173 | -.1237843            | .6871233  |
| Spain               | .940242   | .1798717  | 5.23   | 0.000 | .5877                | 1.292784  |
| Italy               | 1.103338  | .1638678  | 6.73   | 0.000 | .7821632             | 1.424513  |
| France              | .4516516  | .1881219  | 2.40   | 0.016 | .0829395             | .8203638  |
| Denmark             | -.168879  | .2116775  | -0.80  | 0.425 | -.5837594            | .2460014  |
| Greece              | .6814009  | .1666302  | 4.09   | 0.000 | .3548118             | 1.00799   |
| Switzerland         | .2868327  | .1950087  | 1.47   | 0.141 | -.0953774            | .6690427  |
| Belgium             | .7430044  | .1644199  | 4.52   | 0.000 | .4207473             | 1.065261  |
| Israel              | .5444894  | .2127871  | 2.56   | 0.011 | .1274343             | .9615445  |
| Czech Republic      | -.2771575 | .2065027  | -1.34  | 0.180 | -.6818954            | .1275805  |
| Poland              | .376064   | .2207395  | 1.70   | 0.088 | -.0565774            | .8087054  |
| Luxembourg          | .7186154  | .2191265  | 3.28   | 0.001 | .2891353             | 1.148095  |
| Slovenia            | .0069912  | .1894339  | 0.04   | 0.971 | -.3642924            | .3782747  |
| Estonia             | .4065381  | .1710255  | 2.38   | 0.017 | .0713343             | .7417419  |
| Croatia             | .319023   | .1956291  | 1.63   | 0.103 | -.064403             | .702449   |
| -----               |           |           |        |       |                      |           |
| _cons               | -2.861935 | .1912717  | -14.96 | 0.000 | -3.236821            | -2.48705  |
| -----               |           |           |        |       |                      |           |

```

Multiple-imputation estimates      Imputations      =          5
Average marginal effects         Number of obs    =       15,538
                                Average RVI      =          0.0000
                                Largest FMI       =          0.0000
DF adjustment:  Large sample     DF:  min        =       2.87e+62
                                avg          =       5.81e+62
                                max          =          .
Within VCE type: Delta-method

```

```

Expression   : Pr(dep_by_covid), predict(pr)
dy/dx w.r.t. : 2.age_cat 3.age_cat 4.age_cat 5.age_cat 6.age_cat 7.age_cat 2.education 3.education
2.dep_cat_AS 3.dep_cat_AS 4.dep_cat_AS 5.dep_cat_AS 6.dep_cat_AS 7.dep_cat_AS 12.country 13.country
15.country 16.country 17.country 18.country 19.country 20.country 23.country 25.country 28.country
29.country 31.country 34.country 35.country 47.country

```

|                     | dy/dx     | Std. Err. | t     | P> t  | [95% Conf. Interval] |           |
|---------------------|-----------|-----------|-------|-------|----------------------|-----------|
| -----               |           |           |       |       |                      |           |
| age_cat             |           |           |       |       |                      |           |
| 60-64               | -.0015841 | .01066    | -0.15 | 0.882 | -.0224773            | .0193092  |
| 65-69               | -.0080945 | .0102332  | -0.79 | 0.429 | -.0281513            | .0119622  |
| 70-74               | .0001833  | .0103018  | 0.02  | 0.986 | -.0200079            | .0203744  |
| 75-79               | -.0023728 | .0107494  | -0.22 | 0.825 | -.0234412            | .0186956  |
| 80-84               | .0433537  | .0120627  | 3.59  | 0.000 | .0197112             | .0669961  |
| >84                 | .0252787  | .012731   | 1.99  | 0.047 | .0003264             | .0502311  |
| education           |           |           |       |       |                      |           |
| Middle              | -.0185646 | .0067611  | -2.75 | 0.006 | -.0318161            | -.005313  |
| High                | -.0207506 | .0068347  | -3.04 | 0.002 | -.0341465            | -.0073548 |
| dep_cat_AS          |           |           |       |       |                      |           |
| Low risk            | .0302452  | .0149871  | 2.02  | 0.044 | .000871              | .0596194  |
| Middle risk         | .0539325  | .0080663  | 6.69  | 0.000 | .0381229             | .0697422  |
| High risk           | .0530561  | .0059014  | 8.99  | 0.000 | .0414895             | .0646227  |
| Depressed           | .0799855  | .0190755  | 4.19  | 0.000 | .0425982             | .1173728  |
| Severely depressed  | .1827515  | .0257716  | 7.09  | 0.000 | .1322401             | .2332628  |
| Extremely depressed | .1453332  | .056498   | 2.57  | 0.010 | .034599              | .2560673  |
| country             |           |           |       |       |                      |           |
| Germany             | .0257369  | .0126602  | 2.03  | 0.042 | .0009233             | .0505506  |
| Sweden              | .0204819  | .015206   | 1.35  | 0.178 | -.0093213            | .0502852  |
| Spain               | .0897041  | .0165788  | 5.41  | 0.000 | .0572102             | .1221981  |
| Italy               | .1122545  | .0141787  | 7.92  | 0.000 | .0844648             | .1400441  |
| France              | .0352659  | .0145171  | 2.43  | 0.015 | .0068129             | .0637189  |
| Denmark             | -.0101679 | .0127441  | -0.80 | 0.425 | -.0351459            | .01481    |
| Greece              | .0585264  | .0128772  | 4.54  | 0.000 | .0332876             | .0837651  |
| Switzerland         | .0209026  | .0141915  | 1.47  | 0.141 | -.0069123            | .0487175  |
| Belgium             | .0654511  | .0128022  | 5.11  | 0.000 | .0403593             | .090543   |
| Israel              | .0441918  | .018104   | 2.44  | 0.015 | .0087086             | .0796749  |
| Czech Republic      | -.015954  | .0120029  | -1.33 | 0.184 | -.0394792            | .0075712  |
| Poland              | .02845    | .0173081  | 1.64  | 0.100 | -.0054733            | .0623733  |
| Luxembourg          | .0626735  | .0207496  | 3.02  | 0.003 | .0220051             | .1033419  |
| Slovenia            | .000453   | .0122686  | 0.04  | 0.971 | -.0235929            | .024499   |
| Estonia             | .0311503  | .0123654  | 2.52  | 0.012 | .0069145             | .0553861  |
| Croatia             | .0235646  | .0143832  | 1.64  | 0.101 | -.0046259            | .051755   |

Note: dy/dx for factor levels is the discrete change from the base level.

MODEL II

```

Multiple-imputation estimates          Imputations      =          5
Logistic regression                   Number of obs    =        15,538
                                      Average RVI      =         0.1416
                                      Largest FMI     =         0.5566
DF adjustment:  Large sample          DF:      min    =         15.77
                                      avg          =    4879315.32
                                      max          =         2.77e+08
Model F test:      Equal FMI          F( 57,13930.2) =         10.18
Within VCE type:  Robust              Prob > F        =         0.0000
    
```

| dep_by_covid              | Coef.     | Std. Err. | t     | P> t  | [95% Conf. Interval] |           |
|---------------------------|-----------|-----------|-------|-------|----------------------|-----------|
| -----                     |           |           |       |       |                      |           |
| age_cat                   |           |           |       |       |                      |           |
| 60-64                     | -.0678426 | .1231362  | -0.55 | 0.582 | -.3092601            | .1735748  |
| 65-69                     | -.1886275 | .1381862  | -1.37 | 0.173 | -.4601822            | .0829272  |
| 70-74                     | -.1188285 | .1431986  | -0.83 | 0.407 | -.4000605            | .1624034  |
| 75-79                     | -.1836146 | .150139   | -1.22 | 0.222 | -.4784835            | .1112542  |
| 80-84                     | .1954833  | .1514607  | 1.29  | 0.197 | -.1016019            | .4925685  |
| >84                       | -.0495023 | .163722   | -0.30 | 0.762 | -.3707195            | .2717149  |
| education                 |           |           |       |       |                      |           |
| Middle                    | -.1540877 | .0711309  | -2.17 | 0.030 | -.2935157            | -.0146598 |
| High                      | -.1327321 | .0743434  | -1.79 | 0.074 | -.2784581            | .0129939  |
| dep_cat_AS                |           |           |       |       |                      |           |
| Low risk                  | .3208691  | .160817   | 2.00  | 0.046 | .0056379             | .6361002  |
| Middle risk               | .5367406  | .0797465  | 6.73  | 0.000 | .3804343             | .6930469  |
| High risk                 | .480095   | .0632478  | 7.59  | 0.000 | .3561272             | .6040628  |
| Depressed                 | .6880526  | .1546136  | 4.45  | 0.000 | .3850131             | .9910922  |
| Severely depressed        | 1.230351  | .1491238  | 8.25  | 0.000 | .9380461             | 1.522655  |
| Extremely depressed       | .8905681  | .347303   | 2.56  | 0.010 | .2098388             | 1.571297  |
| 1.widow_last2y            | .1066383  | .2149182  | 0.50  | 0.620 | -.3154228            | .5286995  |
| 1.retired_last2y          | .053773   | .1767629  | 0.30  | 0.764 | -.3122129            | .419759   |
| 1.heart_att_stroke_last2y | .2154432  | .1292785  | 1.67  | 0.098 | -.0404145            | .4713008  |
| 1.cancer_last2y           | .1045585  | .1749345  | 0.60  | 0.553 | -.2486071            | .4577241  |
| 1.diabetes_ever_diagn     | -.0275843 | .0669093  | -0.41 | 0.680 | -.1587612            | .1035926  |
| 1.lung_dis_ever_diagn     | .0966551  | .0999789  | 0.97  | 0.337 | -.1028055            | .2961157  |
| 1.hypertens_ever_diagn    | .00666007 | .0597671  | 0.11  | 0.912 | -.110592             | .1237933  |
| 1.cholester_ever_diagn    | -.0518292 | .0699652  | -0.74 | 0.461 | -.1914345            | .0877762  |
| 1.alzheimer_ever_diagn    | -.2377069 | .2079711  | -1.14 | 0.270 | -.6791149            | .2037011  |
| 1.affect_dis_ever_diagn   | .4011304  | .101034   | 3.97  | 0.000 | .2028943             | .5993665  |
| 1.art_rheum_ever_diagn    | -.0482052 | .0919952  | -0.52 | 0.600 | -.2285177            | .1321073  |
| 1.osteoart_ever_diagn     | .2472216  | .0764453  | 3.23  | 0.002 | .096113              | .3983303  |
| 1.adl1                    | -.0027245 | .1135217  | -0.02 | 0.981 | -.2330485            | .2275994  |
| 1.iadl1                   | .3131946  | .0926729  | 3.38  | 0.001 | .1294929             | .4968964  |
| bmi_class                 |           |           |       |       |                      |           |
| Overweighted              | -.0559553 | .0649193  | -0.86 | 0.389 | -.1834718            | .0715612  |
| Obese                     | .0124744  | .0780129  | 0.16  | 0.873 | -.1404874            | .1654362  |
| fluency                   | -.0046635 | .0052703  | -0.88 | 0.383 | -.0154221            | .0060951  |
| hhszize                   | -.0782045 | .0382644  | -2.04 | 0.041 | -.1532019            | -.0032072 |
| 1.partner_hh              | -.0444801 | .0814482  | -0.55 | 0.585 | -.2041291            | .1151689  |
| child_class               |           |           |       |       |                      |           |
| 1 child                   | .2438379  | .1263848  | 1.93  | 0.061 | -.0122184            | .4998943  |
| More than 1 child         | .2232839  | .1098217  | 2.03  | 0.048 | .0025604             | .4440074  |
| job_status                |           |           |       |       |                      |           |
| Self-employed             | .2022599  | .1919523  | 1.05  | 0.297 | -.1838157            | .5883354  |
| Retired                   | .1391744  | .1430492  | 0.97  | 0.338 | -.1521807            | .4305294  |
| Unempl., Perm sick, other | .2250623  | .1703717  | 1.32  | 0.190 | -.1138814            | .5640061  |
| Homemaker                 | .2762037  | .5528712  | 0.50  | 0.620 | -.8414079            | 1.393815  |
| house_owner               |           |           |       |       |                      |           |
| Tenant/Subtenant          | .2155709  | .0977428  | 2.21  | 0.032 | .0192473             | .4118945  |
| Rent free                 | .0767723  | .1212183  | 0.63  | 0.527 | -.1610634            | .3146079  |
| country                   |           |           |       |       |                      |           |
| Germany                   | .3519201  | .1815528  | 1.94  | 0.053 | -.0039254            | .7077656  |
| Sweden                    | .3707813  | .2126046  | 1.74  | 0.081 | -.0459171            | .7874797  |
| Spain                     | 1.049024  | .1883445  | 5.57  | 0.000 | .6798714             | 1.418177  |
| Italy                     | 1.264649  | .1734525  | 7.29  | 0.000 | .92468               | 1.604617  |
| France                    | .4959129  | .1958928  | 2.53  | 0.011 | .1119699             | .8798558  |
| Denmark                   | -.1230844 | .2193728  | -0.56 | 0.575 | -.5530497            | .3068809  |
| Greece                    | .8298473  | .1771679  | 4.68  | 0.000 | .4825775             | 1.177117  |
| Switzerland               | .3591761  | .2012737  | 1.78  | 0.074 | -.0353144            | .7536666  |
| Belgium                   | .7234874  | .1714353  | 4.22  | 0.000 | .3874734             | 1.059501  |

|                |           |          |        |       |           |           |
|----------------|-----------|----------|--------|-------|-----------|-----------|
| Israel         | .6636453  | .2224134 | 2.98   | 0.003 | .2277069  | 1.099584  |
| Czech Republic | -.2171131 | .2100737 | -1.03  | 0.301 | -.62885   | .1946238  |
| Poland         | .4038304  | .227015  | 1.78   | 0.075 | -.0411844 | .8488452  |
| Luxembourg     | .8296306  | .2229055 | 3.72   | 0.000 | .3927415  | 1.26652   |
| Slovenia       | .1393917  | .1943347 | 0.72   | 0.473 | -.2414982 | .5202816  |
| Estonia        | .4673518  | .1770049 | 2.64   | 0.008 | .1204277  | .8142759  |
| Croatia        | .4223865  | .2022707 | 2.09   | 0.037 | .0259343  | .8188387  |
| _____          | _____     | _____    | _____  | _____ | _____     | _____     |
| _cons          | -2.99367  | .2660553 | -11.25 | 0.000 | -3.515716 | -2.471625 |

```

Multiple-imputation estimates      Imputations      =      5
Average marginal effects         Number of obs    =    15,538
                                  Average RVI      =     0.1460
                                  Largest FMI     =     0.5679
DF adjustment:  Large sample     DF:  min        =     15.12
                                  avg             =   957,439.21
Within VCE type: Delta-method    max            =     5.07e+07

```

```

Expression   : Pr(dep_by_covid), predict(pr)
dy/dx w.r.t. : 2.age_cat 3.age_cat 4.age_cat 5.age_cat 6.age_cat 7.age_cat 2.education 3.education
2.dep_cat_AS 3.dep_cat_AS 4.dep_cat_AS 5.dep_cat_AS 6.dep_cat_AS 7.dep_cat_AS 1.widow_last2y
1.retired_last2y 1.heart_att_stroke_last2y 1.cancer_last2y 1.diabetes_ever_diagn 1.lung_dis_ever_diagn
1.hypertens_ever_diagn 1.cholester_ever_diagn 1.alzheimer_ever_diagn 1.affect_dis_ever_diagn
1.art_rheum_ever_diagn 1.osteoart_ever_diagn 1.adl2 1.iadl2 2.bmi_class 3.bmi_class fluency hhsiz
1.partner_hh 2.child_class 3.child_class 2.job_status 3.job_status 4.job_status 5.job_status
2.house_owner 3.house_owner 12.country 13.country 15.country 16.country 17.country 18.country
19.country 20.country 23.country 25.country 28.country 29.country 31.country 34.country 35.country
47.country

```

|                           | dy/dx     | Std. Err. | t     | P> t  | [95% Conf. Interval] |           |
|---------------------------|-----------|-----------|-------|-------|----------------------|-----------|
| -----                     |           |           |       |       |                      |           |
| age_cat                   |           |           |       |       |                      |           |
| 60-64                     | -.0065533 | .0120136  | -0.55 | 0.585 | -.0301078            | .0170012  |
| 65-69                     | -.0174247 | .0132506  | -1.32 | 0.189 | -.0434649            | .0086154  |
| 70-74                     | -.011263  | .0138518  | -0.81 | 0.416 | -.0384681            | .015942   |
| 75-79                     | -.0169931 | .0142823  | -1.19 | 0.235 | -.0450455            | .0110592  |
| 80-84                     | .0206099  | .0156072  | 1.32  | 0.187 | -.0099989            | .0512187  |
| >84                       | -.004824  | .0159291  | -0.30 | 0.762 | -.0360773            | .0264293  |
| education                 |           |           |       |       |                      |           |
| Middle                    | -.014525  | .0067132  | -2.16 | 0.031 | -.0276841            | -.001366  |
| High                      | -.0126069 | .0070468  | -1.79 | 0.074 | -.02642              | .0012062  |
| dep_cat_AS                |           |           |       |       |                      |           |
| Low risk                  | .027287   | .0151745  | 1.80  | 0.072 | -.0024579            | .0570319  |
| Middle risk               | .0496133  | .0081527  | 6.09  | 0.000 | .0336337             | .0655929  |
| High risk                 | .0434191  | .0059217  | 7.33  | 0.000 | .0318123             | .0550259  |
| Depressed                 | .0673721  | .0185881  | 3.62  | 0.000 | .0309397             | .1038045  |
| Severely depressed        | .1463392  | .0242184  | 6.04  | 0.000 | .0988666             | .1938118  |
| Extremely depressed       | .0940394  | .0483067  | 1.95  | 0.052 | -.0006437            | .1887224  |
| 1.widow_last2y            | .0103975  | .0215377  | 0.48  | 0.629 | -.0318951            | .0526901  |
| 1.retired_last2y          | .0053749  | .0171426  | 0.31  | 0.757 | -.0301808            | .0409306  |
| 1.heart_att_stroke_last2y | .0215941  | .0138827  | 1.56  | 0.121 | -.0057759            | .0489641  |
| 1.cancer_last2y           | .0102984  | .0176643  | 0.58  | 0.563 | -.0254735            | .0460703  |
| 1.diabetes_ever_diagn     | -.0025552 | .0061693  | -0.41 | 0.679 | -.0146502            | .0095398  |
| 1.lung_dis_ever_diagn     | .0092969  | .009823   | 0.95  | 0.347 | -.0102984            | .0288922  |
| 1.hypertens_ever_diagn    | .0006142  | .0055694  | 0.11  | 0.912 | -.0103065            | .0115349  |
| 1.cholester_ever_diagn    | -.0048007 | .0064569  | -0.74 | 0.460 | -.0176847            | .0080832  |
| 1.alzheimer_ever_diagn    | -.0200898 | .016797   | -1.20 | 0.250 | -.0558665            | .015687   |
| 1.affect_dis_ever_diagn   | .0421089  | .0118392  | 3.56  | 0.000 | .01888               | .0653379  |
| 1.art_rheum_ever_diagn    | -.0044346 | .0083545  | -0.53 | 0.596 | -.0208095            | .0119404  |
| 1.osteoart_ever_diagn     | .0242646  | .0078725  | 3.08  | 0.002 | .0087065             | .0398228  |
| 1.adl2                    | -.0001861 | .0105854  | -0.02 | 0.986 | -.0216695            | .0212973  |
| 1.iadl2                   | .0313194  | .0099025  | 3.16  | 0.002 | .0116891             | .0509498  |
| bmi_class                 |           |           |       |       |                      |           |
| Overweighted              | -.0051995 | .0060603  | -0.86 | 0.391 | -.0171024            | .0067034  |
| Obese                     | .0011942  | .0074366  | 0.16  | 0.872 | -.013387             | .0157754  |
| fluency                   | -.0004348 | .0004913  | -0.88 | 0.383 | -.0014377            | .0005681  |
| hhsiz                     | -.007291  | .0035667  | -2.04 | 0.041 | -.0142817            | -.0003003 |
| 1.partner_hh              | -.0041873 | .0077354  | -0.54 | 0.588 | -.0193496            | .0109751  |
| child_class               |           |           |       |       |                      |           |
| 1 child                   | .0214575  | .01084    | 1.98  | 0.055 | -.0004852            | .0434002  |
| More than 1 child         | .0194746  | .0090324  | 2.16  | 0.036 | .0013368             | .0376124  |
| job_status                |           |           |       |       |                      |           |
| Self-employed             | .0185032  | .0180653  | 1.02  | 0.311 | -.0177793            | .0547858  |

|                           |  |           |          |       |       |           |          |
|---------------------------|--|-----------|----------|-------|-------|-----------|----------|
| Retired                   |  | .012327   | .0123626 | 1.00  | 0.326 | -.0128655 | .0375194 |
| Unempl., Perm sick, other |  | .0207077  | .0160515 | 1.29  | 0.200 | -.0111693 | .0525847 |
| Homemaker                 |  | .0274734  | .0575123 | 0.48  | 0.636 | -.0889494 | .1438961 |
| house_owner               |  |           |          |       |       |           |          |
| Tenant/Subtenant          |  | .0212828  | .0101909 | 2.09  | 0.042 | .0008022  | .0417633 |
| Rent free                 |  | .007223   | .0116302 | 0.62  | 0.535 | -.015597  | .030043  |
| country                   |  |           |          |       |       |           |          |
| Germany                   |  | .0246732  | .0122388 | 2.02  | 0.044 | .0006848  | .0486617 |
| Sweden                    |  | .0261992  | .0152164 | 1.72  | 0.085 | -.0036245 | .0560229 |
| Spain                     |  | .0978978  | .017099  | 5.73  | 0.000 | .0643837  | .1314118 |
| Italy                     |  | .1283254  | .0149899 | 8.56  | 0.000 | .0989445  | .1577063 |
| France                    |  | .0369257  | .014413  | 2.56  | 0.010 | .0086766  | .0651747 |
| Denmark                   |  | -.0070701 | .0126045 | -0.56 | 0.575 | -.0317747 | .0176345 |
| Greece                    |  | .0709208  | .0136153 | 5.21  | 0.000 | .0442311  | .0976105 |
| Switzerland               |  | .025257   | .0141052 | 1.79  | 0.073 | -.0023888 | .0529028 |
| Belgium                   |  | .0591973  | .012459  | 4.75  | 0.000 | .0347772  | .0836175 |
| Israel                    |  | .0529804  | .0188219 | 2.81  | 0.005 | .0160887  | .089872  |
| Czech Republic            |  | -.0119979 | .0117052 | -1.03 | 0.305 | -.0349396 | .0109437 |
| Poland                    |  | .0289499  | .0169056 | 1.71  | 0.087 | -.0041917 | .0620914 |
| Luxembourg                |  | .070894   | .0208248 | 3.40  | 0.001 | .0300779  | .1117101 |
| Slovenia                  |  | .0089386  | .0123457 | 0.72  | 0.469 | -.0152586 | .0331357 |
| Estonia                   |  | .0343847  | .0122138 | 2.82  | 0.005 | .010446   | .0583234 |
| Croatia                   |  | .0305029  | .0145568 | 2.10  | 0.036 | .0019711  | .0590347 |

-----  
Note: dy/dx for factor levels is the discrete change from the base level.

MODEL III

|                               |                |   |            |
|-------------------------------|----------------|---|------------|
| Multiple-imputation estimates | Imputations    | = | 5          |
| Logistic regression           | Number of obs  | = | 15,538     |
|                               | Average RVI    | = | 0.1215     |
|                               | Largest FMI    | = | 0.5998     |
| DF adjustment: Large sample   | DF: min        | = | 13.49      |
|                               | avg            | = | 779,303.13 |
|                               | max            | = | 4.53e+07   |
| Model F test: Equal FMI       | F( 69,22317.5) | = | 11.40      |
| Within VCE type: Robust       | Prob > F       | = | 0.0000     |

| dep_by_covid              | Coef.     | Std. Err. | t     | P> t  | [95% Conf. Interval] |           |
|---------------------------|-----------|-----------|-------|-------|----------------------|-----------|
| -----                     |           |           |       |       |                      |           |
| age_cat                   |           |           |       |       |                      |           |
| 60-64                     | -.0650283 | .1243668  | -0.52 | 0.601 | -.3088528            | .1787962  |
| 65-69                     | -.1720605 | .141461   | -1.22 | 0.225 | -.450263             | .106142   |
| 70-74                     | -.133607  | .1477467  | -0.90 | 0.366 | -.4239924            | .1567784  |
| 75-79                     | -.2399458 | .1548412  | -1.55 | 0.122 | -.544189             | .0642974  |
| 80-84                     | .1035004  | .1572985  | 0.66  | 0.511 | -.2051751            | .4121758  |
| >84                       | -.1519479 | .1718012  | -0.88 | 0.377 | -.4892438            | .185348   |
| education                 |           |           |       |       |                      |           |
| Middle                    | -.1662024 | .0722253  | -2.30 | 0.021 | -.3077767            | -.0246282 |
| High                      | -.1566562 | .0754987  | -2.07 | 0.038 | -.3046454            | -.008667  |
| dep_cat_AS                |           |           |       |       |                      |           |
| Low risk                  | .3421253  | .1625683  | 2.10  | 0.035 | .0234708             | .6607798  |
| Middle risk               | .5046481  | .0807621  | 6.25  | 0.000 | .3463542             | .662942   |
| High risk                 | .4445278  | .0641281  | 6.93  | 0.000 | .3188367             | .570219   |
| Depressed                 | .6701552  | .1561105  | 4.29  | 0.000 | .364183              | .9761275  |
| Severely depressed        | 1.224552  | .1495211  | 8.19  | 0.000 | .9314791             | 1.517625  |
| Extremely depressed       | .8394032  | .3323486  | 2.53  | 0.012 | .1879873             | 1.490819  |
| 1.widow_last2y            |           |           |       |       |                      |           |
| 1.retired_last2y          | .0292926  | .1813633  | 0.16  | 0.873 | -.3469301            | .4055152  |
| 1.heart_att_stroke_last2y | .160356   | .1273722  | 1.26  | 0.209 | -.0906341            | .4113461  |
| 1.cancer_last2y           | .0458464  | .1739055  | 0.26  | 0.793 | -.3051386            | .3968315  |
| 1.diabetes_ever_diagn     | -.0397541 | .0672332  | -0.59 | 0.554 | -.1715526            | .0920443  |
| 1.lung_dis_ever_diagn     | .0583059  | .1025446  | 0.57  | 0.572 | -.1474381            | .2640499  |
| 1.hypertens_ever_diagn    | -.0183354 | .0606108  | -0.30 | 0.762 | -.1371916            | .1005208  |
| 1.cholester_ever_diagn    | -.0736925 | .0699337  | -1.05 | 0.295 | -.2129556            | .0655707  |
| 1.alzheimer_ever_diagn    | -.2230684 | .2166844  | -1.03 | 0.321 | -.6894619            | .2433252  |
| 1.affect_dis_ever_diagn   | .3798638  | .1020795  | 3.72  | 0.000 | .1796102             | .5801173  |
| 1.art_rheum_ever_diagn    | -.0565515 | .094292   | -0.60 | 0.549 | -.2414629            | .1283599  |
| 1.osteoaart_ever_diagn    | .209362   | .0772149  | 2.71  | 0.007 | .056914              | .36181    |
| 1.adl1                    | -.0303102 | .1156023  | -0.26 | 0.795 | -.2647006            | .2040802  |
| 1.iadl1                   | .2585976  | .0905102  | 2.86  | 0.005 | .0803738             | .4368214  |
| bmi_class                 |           |           |       |       |                      |           |
| Overweighted              | -.057407  | .066232   | -0.87 | 0.387 | -.1876017            | .0727877  |
| Obese                     | .0197287  | .0796298  | 0.25  | 0.804 | -.1364528            | .1759102  |
| fluency                   |           |           |       |       |                      |           |
| hhszize                   | -.0496799 | .0380752  | -1.30 | 0.192 | -.1243085            | .0249486  |
| 1.partner_hh              | -.0920644 | .0826595  | -1.11 | 0.265 | -.2540853            | .0699564  |
| child_class               |           |           |       |       |                      |           |
| 1 child                   | .1884917  | .1271193  | 1.48  | 0.145 | -.0679394            | .4449229  |
| More than 1 child         | .1419639  | .1132142  | 1.25  | 0.216 | -.0855981            | .369526   |
| job_status                |           |           |       |       |                      |           |
| Self-employed             | .137303   | .1944717  | 0.71  | 0.484 | -.2549243            | .5295302  |
| Retired                   | .1936781  | .1484927  | 1.30  | 0.202 | -.1091304            | .4964866  |
| Unempl., Perm sick, other | .2841544  | .1739025  | 1.63  | 0.106 | -.0619369            | .6302458  |
| Homemaker                 | .2755201  | .5651379  | 0.49  | 0.628 | -.8598239            | 1.410864  |
| house_owner               |           |           |       |       |                      |           |
| Tenant/Subtenant          | .2048063  | .1040117  | 1.97  | 0.057 | -.0065865            | .416199   |
| Rent free                 | .0680722  | .1261752  | 0.54  | 0.590 | -.1800527            | .3161971  |
| 1.covid_pos               |           |           |       |       |                      |           |
| 1.covid_neg               | .3106797  | .0682701  | 4.55  | 0.000 | .1768728             | .4444867  |
| 1.hosp_covid              | .259376   | .138238   | 1.88  | 0.061 | -.0115668            | .5303187  |
| 1.die_covid               | .2790719  | .1363836  | 2.05  | 0.041 | .0117631             | .5463808  |
| 1.no_pers_contact         | .2352349  | .0589436  | 3.99  | 0.000 | .1196988             | .3507711  |
| 1.no_soc_contact          | -.0688831 | .1053371  | -0.65 | 0.513 | -.2753423            | .1375761  |
| 1.help_given              | .0444778  | .0816202  | 0.54  | 0.586 | -.1154963            | .2044518  |
| 1.help_received           | .4715435  | .0652877  | 7.22  | 0.000 | .3435805             | .5995065  |
| 1.financial_received      | .1331047  | .1119126  | 1.19  | 0.234 | -.0862422            | .3524517  |
| 1.unempl_covid            | .5732445  | .1303203  | 4.40  | 0.000 | .3178129             | .8286762  |



|                           |           |          |       |       |           |          |
|---------------------------|-----------|----------|-------|-------|-----------|----------|
| bmi_class                 |           |          |       |       |           |          |
| Overweighted              | -.0052069 | .0060351 | -0.86 | 0.389 | -.0170692 | .0066554 |
| Obese                     | .0018452  | .0074291 | 0.25  | 0.804 | -.0127261 | .0164165 |
| fluency                   |           |          |       |       |           |          |
| hhszise                   | -.0004744 | .000483  | -0.98 | 0.333 | -.0014576 | .0005088 |
| 1.partner_hh              | -.0085476 | .0078174 | -1.30 | 0.192 | -.0113249 | .0022734 |
| child_class               |           |          |       |       |           |          |
| 1 child                   | .0166708  | .0110071 | 1.51  | 0.137 | -.0055135 | .0388552 |
| More than 1 child         | .0123226  | .009503  | 1.30  | 0.201 | -.0067678 | .0314129 |
| job_status                |           |          |       |       |           |          |
| Self-employed             | .0116558  | .0168111 | 0.69  | 0.492 | -.0222349 | .0455465 |
| Retired                   | .0166389  | .012269  | 1.36  | 0.185 | -.008392  | .0416699 |
| Unempl., Perm sick, other | .0253535  | .0159479 | 1.59  | 0.115 | -.0063288 | .0570358 |
| Homemaker                 | .0257586  | .0554725 | 0.46  | 0.644 | -.0857245 | .1372416 |
| house_owner               |           |          |       |       |           |          |
| Tenant/Subtenant          | .0196925  | .0105222 | 1.87  | 0.070 | -.0017155 | .0411005 |
| Rent free                 | .0062681  | .0117661 | 0.53  | 0.595 | -.0168715 | .0294078 |
| 1.covid_pos               |           |          |       |       |           |          |
| 1.covid_neg               | .0036322  | .0099273 | 0.37  | 0.714 | -.0158253 | .0230896 |
| 1.hosp_covid              | .0301219  | .0070208 | 4.29  | 0.000 | .0163615  | .0438823 |
| 1.die_covid               | .0255974  | .0147169 | 1.74  | 0.082 | -.0032474 | .0544422 |
| 1.no_pers_contact         | .0277584  | .0147464 | 1.88  | 0.060 | -.0011442 | .056661  |
| 1.no_soc_contact          | .0221266  | .0057125 | 3.87  | 0.000 | .0109294  | .0333238 |
| 1.help_given              | -.0061477 | .0092115 | -0.67 | 0.505 | -.0242021 | .0119067 |
| 1.help_received           | .0040971  | .0076002 | 0.54  | 0.590 | -.0107992 | .0189933 |
| 1.financial_received      | .0466947  | .0069967 | 6.67  | 0.000 | .0329813  | .0604082 |
| 1.unempl_covid            | .0125886  | .01098   | 1.15  | 0.252 | -.008932  | .0341093 |
| 1.never_left_home         | .0622994  | .0165576 | 3.76  | 0.000 | .0298461  | .0947528 |
| 1.change_illness          | .0024809  | .0069714 | 0.36  | 0.722 | -.0111834 | .0161452 |
|                           | .0851664  | .0096002 | 8.87  | 0.000 | .0663495  | .1039834 |
| country                   |           |          |       |       |           |          |
| Germany                   | .038225   | .0115893 | 3.30  | 0.001 | .0155091  | .0609409 |
| Sweden                    | .031313   | .0140059 | 2.24  | 0.025 | .0038617  | .0587643 |
| Spain                     | .1118681  | .0164168 | 6.81  | 0.000 | .0796912  | .1440449 |
| Italy                     | .1388295  | .0143573 | 9.67  | 0.000 | .1106885  | .1669704 |
| France                    | .052214   | .0140261 | 3.72  | 0.000 | .0247232  | .0797048 |
| Denmark                   | .0041958  | .011891  | 0.35  | 0.724 | -.0191103 | .0275019 |
| Greece                    | .0941269  | .0135349 | 6.95  | 0.000 | .0675967  | .1206571 |
| Switzerland               | .0282587  | .0127613 | 2.21  | 0.027 | .0032468  | .0532707 |
| Belgium                   | .0570956  | .0111031 | 5.14  | 0.000 | .0353337  | .0788575 |
| Israel                    | .059006   | .0184153 | 3.20  | 0.001 | .0229118  | .0951002 |
| Czech Republic            | -.0005656 | .0109136 | -0.05 | 0.959 | -.0219559 | .0208246 |
| Poland                    | .0441896  | .0168826 | 2.62  | 0.009 | .0110936  | .0772856 |
| Luxembourg                | .0566179  | .0177935 | 3.18  | 0.001 | .021743   | .0914928 |
| Slovenia                  | .0199919  | .0124318 | 1.61  | 0.108 | -.004374  | .0443579 |
| Estonia                   | .0509244  | .0117181 | 4.35  | 0.000 | .0279573  | .0738914 |
| Croatia                   | .0505944  | .0144981 | 3.49  | 0.000 | .0221775  | .0790114 |

-----  
Note: dy/dx for factor levels is the discrete change from the base level.



**MODEL ESTIMATION: FEMALES**

MODEL I

```

Multiple-imputation estimates      Imputations      =      5
Logistic regression              Number of obs    =    21,937
                                  Average RVI      =     0.0000
                                  Largest FMI       =     0.0000
DF adjustment:  Large sample      DF:   min       =    6.94e+61
                                  avg         =    1.23e+65
                                  max         =      .
Model F test:   Equal FMI        F( 30, 1.5e+66) =    32.88
Within VCE type: Robust          Prob > F         =     0.0000
    
```

| dep_by_covid        | Coef.     | Std. Err. | t      | P> t  | [95% Conf. Interval] |
|---------------------|-----------|-----------|--------|-------|----------------------|
| age_cat             |           |           |        |       |                      |
| 60-64               | .0446272  | .0683863  | 0.65   | 0.514 | -.0894074 .1786618   |
| 65-69               | .0253488  | .0668575  | 0.38   | 0.705 | -.1056895 .1563871   |
| 70-74               | .124518   | .0665069  | 1.87   | 0.061 | -.0058331 .254869    |
| 75-79               | .1290525  | .0705858  | 1.83   | 0.068 | -.009293 .2673981    |
| 80-84               | .220774   | .0737339  | 2.99   | 0.003 | .0762582 .3652899    |
| >84                 | .0779861  | .0787735  | 0.99   | 0.322 | -.0764072 .2323794   |
| education           |           |           |        |       |                      |
| Middle              | -.0890802 | .0445652  | -2.00  | 0.046 | -.1764264 -.0017341  |
| High                | -.1238406 | .0483386  | -2.56  | 0.010 | -.2185825 -.0290987  |
| dep_cat_AS          |           |           |        |       |                      |
| Low risk            | .4596997  | .1387471  | 3.31   | 0.001 | .1877604 .7316389    |
| Middle risk         | .5758272  | .0498038  | 11.56  | 0.000 | .4782136 .6734408    |
| High risk           | .7124293  | .0443045  | 16.08  | 0.000 | .6255942 .7992645    |
| Depressed           | .8268828  | .1033634  | 8.00   | 0.000 | .6242943 1.029471    |
| Severely depressed  | 1.20406   | .0855239  | 14.08  | 0.000 | 1.036436 1.371683    |
| Extremely depressed | 1.245924  | .1766978  | 7.05   | 0.000 | .8996024 1.592245    |
| country             |           |           |        |       |                      |
| Germany             | .2760925  | .1085265  | 2.54   | 0.011 | .0633844 .4888006    |
| Sweden              | .1623365  | .1333732  | 1.22   | 0.224 | -.0990702 .4237432   |
| Spain               | .9615565  | .1101006  | 8.73   | 0.000 | .7457633 1.17735     |
| Italy               | 1.035689  | .09923    | 10.44  | 0.000 | .8412016 1.230176    |
| France              | .718603   | .1084756  | 6.62   | 0.000 | .5059948 .9312113    |
| Denmark             | -.1411193 | .1281276  | -1.10  | 0.271 | -.3922448 .1100061   |
| Greece              | .4710744  | .1013904  | 4.65   | 0.000 | .272353 .6697959     |
| Switzerland         | .3541445  | .1175778  | 3.01   | 0.003 | .1236963 .5845928    |
| Belgium             | .7879505  | .0974697  | 8.08   | 0.000 | .5969133 .9789876    |
| Israel              | .3731726  | .1328895  | 2.81   | 0.005 | .112714 .6336312     |
| Czech Republic      | -.0859837 | .1130061  | -0.76  | 0.447 | -.3074716 .1355041   |
| Poland              | .392614   | .132195   | 2.97   | 0.003 | .1335167 .6517114    |
| Luxembourg          | .7558393  | .1411517  | 5.35   | 0.000 | .479187 1.032492     |
| Slovenia            | -.2567393 | .1145671  | -2.24  | 0.025 | -.4812866 -.032192   |
| Estonia             | .2675451  | .0983598  | 2.72   | 0.007 | .0747633 .4603268    |
| Croatia             | .0077372  | .123577   | 0.06   | 0.950 | -.2344693 .2499438   |
| _cons               | -2.311632 | .1088171  | -21.24 | 0.000 | -2.52491 -2.098355   |

```

Multiple-imputation estimates      Imputations      =      5
Average marginal effects         Number of obs    =    21,937
                                  Average RVI      =      0.0000
                                  Largest FMI      =      0.0000
DF adjustment:  Large sample     DF:  min        =    6.08e+60
                                  avg            =    1.66e+62
                                  max            =      .
Within VCE type: Delta-method

```

```

Expression : Pr(dep_by_covid), predict(pr)
dy/dx w.r.t. : 2.age_cat 3.age_cat 4.age_cat 5.age_cat 6.age_cat 7.age_cat 2.education 3.education
2.dep_cat_AS 3.dep_cat_AS 4.dep_cat_AS 5.dep_cat_AS 6.dep_cat_AS 7.dep_cat_AS 12.country 13.country
15.country 16.country 17.country 18.country 19.country 20.country 23.country 25.country 28.country
29.country 31.country 34.country 35.country 47.country

```

|                     | dy/dx     | Std. Err. | t     | P> t  | [95% Conf. Interval] |           |
|---------------------|-----------|-----------|-------|-------|----------------------|-----------|
| -----               |           |           |       |       |                      |           |
| age_cat             |           |           |       |       |                      |           |
| 60-64               | .0065557  | .0100235  | 0.65  | 0.513 | -.01309              | .0262013  |
| 65-69               | .0037034  | .0097499  | 0.38  | 0.704 | -.0154061            | .0228128  |
| 70-74               | .0187056  | .0099004  | 1.89  | 0.059 | -.0006989            | .03811    |
| 75-79               | .0194111  | .0105691  | 1.84  | 0.066 | -.0013039            | .0401261  |
| 80-84               | .0340493  | .0113551  | 3.00  | 0.003 | .0117938             | .0563049  |
| >84                 | .0115643  | .0117014  | 0.99  | 0.323 | -.01137              | .0344986  |
| education           |           |           |       |       |                      |           |
| Middle              | -.0137124 | .0068578  | -2.00 | 0.046 | -.0271535            | -.0002713 |
| High                | -.0188832 | .0073388  | -2.57 | 0.010 | -.033267             | -.0044993 |
| dep_cat_AS          |           |           |       |       |                      |           |
| Low risk            | .0610214  | .0208879  | 2.92  | 0.003 | .0200818             | .101961   |
| Middle risk         | .0793396  | .0070523  | 11.25 | 0.000 | .0655173             | .0931618  |
| High risk           | .1024089  | .0062505  | 16.38 | 0.000 | .0901581             | .1146597  |
| Depressed           | .1229855  | .0184401  | 6.67  | 0.000 | .0868436             | .1591274  |
| Severely depressed  | .1983048  | .0171806  | 11.54 | 0.000 | .1646315             | .2319781  |
| Extremely depressed | .2073059  | .0377441  | 5.49  | 0.000 | .1333288             | .2812829  |
| country             |           |           |       |       |                      |           |
| Germany             | .036549   | .0142177  | 2.57  | 0.010 | .0086828             | .0644151  |
| Sweden              | .0206892  | .0172352  | 1.20  | 0.230 | -.0130912            | .0544696  |
| Spain               | .1564059  | .0177479  | 8.81  | 0.000 | .1216206             | .1911912  |
| Italy               | .1717349  | .0150475  | 11.41 | 0.000 | .1422423             | .2012274  |
| France              | .1092406  | .0162519  | 6.72  | 0.000 | .0773876             | .1410937  |
| Denmark             | -.0161993 | .0146195  | -1.11 | 0.268 | -.044853             | .0124544  |
| Greece              | .0664165  | .0136954  | 4.85  | 0.000 | .0395741             | .093259   |
| Switzerland         | .0480955  | .0161019  | 2.99  | 0.003 | .0165363             | .0796546  |
| Belgium             | .1222022  | .013892   | 8.80  | 0.000 | .0949744             | .14943    |
| Israel              | .0509931  | .0187779  | 2.72  | 0.007 | .0141891             | .0877971  |
| Czech Republic      | -.0100624 | .0132657  | -0.76 | 0.448 | -.0360628            | .015938   |
| Poland              | .0539872  | .0187963  | 2.87  | 0.004 | .0171472             | .0908273  |
| Luxembourg          | .1161492  | .0235506  | 4.93  | 0.000 | .0699909             | .1623074  |
| Slovenia            | -.0282949 | .0127662  | -2.22 | 0.027 | -.0533162            | -.0032737 |
| Estonia             | .0353176  | .0125511  | 2.81  | 0.005 | .0107179             | .0599172  |
| Croatia             | .0009354  | .0149432  | 0.06  | 0.950 | -.0283527            | .0302235  |
| -----               |           |           |       |       |                      |           |

Note: dy/dx for factor levels is the discrete change from the base level.

MODEL II

```

Multiple-imputation estimates
Logistic regression
Imputations = 5
Number of obs = 21,937
Average RVI = 0.1542
Largest FMI = 0.6444
DF adjustment: Large sample
DF: min = 11.58
      avg = 34,218.12
      max = 691,109.45
Model F test: Equal FMI F( 57,12002.8) = 17.56
Within VCE type: Robust Prob > F = 0.0000
  
```

| dep_by_covid              | Coef.     | Std. Err. | t     | P> t  | [95% Conf. Interval] |           |
|---------------------------|-----------|-----------|-------|-------|----------------------|-----------|
| -----                     |           |           |       |       |                      |           |
| age_cat                   |           |           |       |       |                      |           |
| 60-64                     | -.0290272 | .0721407  | -0.40 | 0.687 | -.1704464            | .112392   |
| 65-69                     | -.0898575 | .0817271  | -1.10 | 0.272 | -.2504871            | .0707721  |
| 70-74                     | -.0272553 | .0877099  | -0.31 | 0.756 | -.1997597            | .1452491  |
| 75-79                     | -.0635142 | .0930849  | -0.68 | 0.495 | -.2464644            | .1194361  |
| 80-84                     | -.0063488 | .0982044  | -0.06 | 0.948 | -.1993805            | .1866829  |
| >84                       | -.2102966 | .1076746  | -1.95 | 0.052 | -.421979             | .0013857  |
| education                 |           |           |       |       |                      |           |
| Middle                    | -.0555711 | .0465254  | -1.19 | 0.232 | -.1467937            | .0356516  |
| High                      | -.0594371 | .0528042  | -1.13 | 0.261 | -.1630399            | .0441658  |
| dep_cat_AS                |           |           |       |       |                      |           |
| Low risk                  | .397538   | .141645   | 2.81  | 0.005 | .1199115             | .6751645  |
| Middle risk               | .5353458  | .0504416  | 10.61 | 0.000 | .43648               | .6342116  |
| High risk                 | .6251009  | .0459071  | 13.62 | 0.000 | .535115              | .7150867  |
| Depressed                 | .7282691  | .1051575  | 6.93  | 0.000 | .5221515             | .9343867  |
| Severely depressed        | 1.014915  | .0895895  | 11.33 | 0.000 | .8392992             | 1.190531  |
| Extremely depressed       | 1.048652  | .1837193  | 5.71  | 0.000 | .6884603             | 1.408844  |
| 1.widow_last2y            | .0727751  | .107911   | 0.67  | 0.500 | -.1387418            | .2842921  |
| 1.retired_last2y          | .0793881  | .1061784  | 0.75  | 0.459 | -.1354924            | .2942685  |
| 1.heart_att_stroke_last2y | -.027889  | .1383152  | -0.20 | 0.842 | -.3111038            | .2553257  |
| 1.cancer_last2y           | .1984344  | .1339065  | 1.48  | 0.145 | -.0712191            | .4680878  |
| 1.diabetes_ever_diagn     | .0027152  | .0492917  | 0.06  | 0.956 | -.0939426            | .099373   |
| 1.lung_dis_ever_diagn     | .0816964  | .0682444  | 1.20  | 0.235 | -.0543131            | .217706   |
| 1.hypertens_ever_diagn    | .0767878  | .0406534  | 1.89  | 0.059 | -.0029973            | .156573   |
| 1.cholester_ever_diagn    | .0060368  | .0536036  | 0.11  | 0.911 | -.1054857            | .1175593  |
| 1.alzheimer_ever_diagn    | -.2422981 | .1248268  | -1.94 | 0.064 | -.4996821            | .0150859  |
| 1.affect_dis_ever_diagn   | .3277741  | .0537211  | 6.10  | 0.000 | .2224231             | .433125   |
| 1.art_rheum_ever_diagn    | .0562919  | .0542716  | 1.04  | 0.302 | -.0513997            | .1639834  |
| 1.osteoaart_ever_diagn    | .1159677  | .0438269  | 2.65  | 0.009 | .0295134             | .202422   |
| 1.adl1                    | .0354257  | .0633818  | 0.56  | 0.577 | -.0893421            | .1601935  |
| 1.iadl1                   | .1316726  | .079076   | 1.67  | 0.123 | -.041321             | .3046662  |
| bmi_class                 |           |           |       |       |                      |           |
| Overweighted              | -.0138347 | .0498126  | -0.28 | 0.783 | -.114615             | .0869456  |
| Obese                     | -.0897255 | .050814   | -1.77 | 0.078 | -.1895559            | .010105   |
| fluency                   | -.0061652 | .0034054  | -1.81 | 0.077 | -.0130161            | .0006856  |
| hhszize                   | -.1317958 | .025764   | -5.12 | 0.000 | -.1822923            | -.0812992 |
| 1.partner_hh              | .0653466  | .0475999  | 1.37  | 0.170 | -.0279519            | .158645   |
| child_class               |           |           |       |       |                      |           |
| 1 child                   | .1800311  | .0725734  | 2.48  | 0.014 | .0370944             | .3229679  |
| More than 1 child         | .1486661  | .063869   | 2.33  | 0.020 | .0233162             | .2740159  |
| job_status                |           |           |       |       |                      |           |
| Self-employed             | -.235025  | .2096326  | -1.12 | 0.275 | -.6712576            | .2012077  |
| Retired                   | .0141405  | .0903241  | 0.16  | 0.877 | -.1697565            | .1980376  |
| Unempl., Perm sick, other | .0312902  | .1045105  | 0.30  | 0.765 | -.1749754            | .2375558  |
| Homemaker                 | .0128181  | .1070741  | 0.12  | 0.906 | -.2086495            | .2342857  |
| house_owner               |           |           |       |       |                      |           |
| Tenant/Subtenant          | .1719585  | .0592532  | 2.90  | 0.005 | .0544602             | .2894569  |
| Rent free                 | .0901077  | .0829785  | 1.09  | 0.284 | -.0779027            | .2581181  |
| country                   |           |           |       |       |                      |           |
| Germany                   | .2669608  | .1104261  | 2.42  | 0.016 | .0505252             | .4833964  |
| Sweden                    | .2316769  | .1364722  | 1.70  | 0.090 | -.0358134            | .4991671  |
| Spain                     | 1.0374    | .1162011  | 8.93  | 0.000 | .8096388             | 1.265161  |
| Italy                     | 1.138706  | .105839   | 10.76 | 0.000 | .931206              | 1.346206  |
| France                    | .7626614  | .1127751  | 6.76  | 0.000 | .5416068             | .983716   |
| Denmark                   | -.1055488 | .1316845  | -0.80 | 0.423 | -.3636766            | .152579   |
| Greece                    | .548344   | .1096236  | 5.00  | 0.000 | .3333776             | .7633103  |
| Switzerland               | .4304963  | .1208654  | 3.56  | 0.000 | .1935852             | .6674074  |
| Belgium                   | .7411465  | .1028005  | 7.21  | 0.000 | .5395703             | .9427228  |

|                |  |           |          |        |       |           |           |
|----------------|--|-----------|----------|--------|-------|-----------|-----------|
| Israel         |  | .4595792  | .1376748 | 3.34   | 0.001 | .189721   | .7294373  |
| Czech Republic |  | -.0284008 | .1150469 | -0.25  | 0.805 | -.2538906 | .197089   |
| Poland         |  | .4711762  | .135948  | 3.47   | 0.001 | .204717   | .7376354  |
| Luxembourg     |  | .8571733  | .1432649 | 5.98   | 0.000 | .5763739  | 1.137973  |
| Slovenia       |  | -.131702  | .1171716 | -1.12  | 0.261 | -.3613586 | .0979546  |
| Estonia        |  | .3380846  | .1009323 | 3.35   | 0.001 | .1402605  | .5359087  |
| Croatia        |  | .0880289  | .1276735 | 0.69   | 0.491 | -.1622102 | .338268   |
|                |  |           |          |        |       |           |           |
| _cons          |  | -2.208569 | .1699931 | -12.99 | 0.000 | -2.543754 | -1.873385 |

```
-----
Multiple-imputation estimates      Imputations      =      5
Average marginal effects         Number of obs    =    21,937
                                   Average RVI      =     0.1566
                                   Largest FMI      =     0.6441
DF adjustment:  Large sample      DF:  min        =     11.59
                                   avg             =    32,182.48
Within VCE type: Delta-method     max             =   506,001.03
-----
```

```
Expression   : Pr(dep_by_covid), predict(pr)
dy/dx w.r.t. : 2.age_cat 3.age_cat 4.age_cat 5.age_cat 6.age_cat 7.age_cat 2.education 3.education
2.dep_cat_AS 3.dep_cat_AS 4.dep_cat_AS 5.dep_cat_AS 6.dep_cat_AS 7.dep_cat_AS 1.widow_last2y
1.retired_last2y 1.heart_att_stroke_last2y 1.cancer_last2y 1.diabetes_ever_diagn 1.lung_dis_ever_diagn
1.hypertens_ever_diagn 1.cholester_ever_diagn 1.alzheimer_ever_diagn 1.affect_dis_ever_diagn
1.art_rheum_ever_diagn 1.osteart_ever_diagn 1.adl2 1.iadl2 2.bmi_class 3.bmi_class fluency hsize
1.partner_hh 2.child_class 3.child_class 2.job_status 3.job_status 4.job_status 5.job_status
2.house_owner 3.house_owner 12.country 13.country 15.country 16.country 17.country 18.country
19.country 20.country 23.country 25.country 28.country 29.country 31.country 34.country 35.country
47.country
```

|                           | dy/dx     | Std. Err. | t     | P> t  | [95% Conf. Interval] |           |
|---------------------------|-----------|-----------|-------|-------|----------------------|-----------|
| age_cat                   |           |           |       |       |                      |           |
| 60-64                     | -.0044807 | .0111488  | -0.40 | 0.688 | -.0263362            | .0173748  |
| 65-69                     | -.0136325 | .0125241  | -1.09 | 0.277 | -.0382494            | .0109844  |
| 70-74                     | -.0042111 | .0135545  | -0.31 | 0.756 | -.0308696            | .0224474  |
| 75-79                     | -.0097064 | .0142754  | -0.68 | 0.497 | -.0377645            | .0183517  |
| 80-84                     | -.000993  | .0152214  | -0.07 | 0.948 | -.0309123            | .0289264  |
| >84                       | -.0308582 | .015827   | -1.95 | 0.052 | -.0619752            | .0002587  |
| education                 |           |           |       |       |                      |           |
| Middle                    | -.0084124 | .0070464  | -1.19 | 0.233 | -.0222285            | .0054036  |
| High                      | -.0089876 | .0079712  | -1.13 | 0.260 | -.0246276            | .0066525  |
| dep_cat_AS                |           |           |       |       |                      |           |
| Low risk                  | .0530739  | .0210266  | 2.52  | 0.012 | .0118615             | .0942862  |
| Middle risk               | .074598   | .0071816  | 10.39 | 0.000 | .060522              | .0886739  |
| High risk                 | .0894954  | .006462   | 13.85 | 0.000 | .0768287             | .1021622  |
| Depressed                 | .1074654  | .0181496  | 5.92  | 0.000 | .0718909             | .1430398  |
| Severely depressed        | .1619235  | .0170148  | 9.52  | 0.000 | .1285712             | .1952758  |
| Extremely depressed       | .1687657  | .0368851  | 4.58  | 0.000 | .0964522             | .2410791  |
| 1.widow_last2y            | .011173   | .0168628  | 0.66  | 0.508 | -.0218799            | .0442259  |
| 1.retired_last2y          | .0122764  | .0165838  | 0.74  | 0.464 | -.0212691            | .045822   |
| 1.heart_att_stroke_last2y | -.0039875 | .0205389  | -0.19 | 0.847 | -.0460405            | .0380655  |
| 1.cancer_last2y           | .0315553  | .022214   | 1.42  | 0.162 | -.0131576            | .0762681  |
| 1.diabetes_ever_diagn     | .0004111  | .0074341  | 0.06  | 0.956 | -.0141667            | .0149889  |
| 1.lung_dis_ever_diagn     | .012558   | .0106699  | 1.18  | 0.243 | -.0087142            | .0338303  |
| 1.hypertens_ever_diagn    | .0115605  | .0061145  | 1.89  | 0.059 | -.0004396            | .0235606  |
| 1.cholester_ever_diagn    | .0009191  | .0080877  | 0.11  | 0.911 | -.0159094            | .0177475  |
| 1.alzheimer_ever_diagn    | -.0341467 | .016576   | -2.06 | 0.050 | -.0683455            | .0000522  |
| 1.affect_dis_ever_diagn   | .0527191  | .0091704  | 5.75  | 0.000 | .0347351             | .0707032  |
| 1.art_rheum_ever_diagn    | .0085775  | .0083471  | 1.03  | 0.307 | -.0079885            | .0251436  |
| 1.osteart_ever_diagn      | .0176717  | .0067468  | 2.62  | 0.010 | .0043636             | .0309798  |
| 1.adl2                    | .0053861  | .0096852  | 0.56  | 0.579 | -.0136793            | .0244515  |
| 1.iadl2                   | .0202627  | .0123525  | 1.64  | 0.128 | -.0067573            | .0472827  |
| bmi_class                 |           |           |       |       |                      |           |
| Overweighted              | -.0021069 | .0075871  | -0.28 | 0.783 | -.017457             | .0132431  |
| Obese                     | -.0133944 | .0075619  | -1.77 | 0.077 | -.0282543            | .0014654  |
| fluency                   | -.0009288 | .0005128  | -1.81 | 0.076 | -.0019605            | .0001028  |
| hsize                     | -.0198578 | .0038779  | -5.12 | 0.000 | -.0274584            | -.0122573 |
| 1.partner_hh              | .0098123  | .0071222  | 1.38  | 0.168 | -.0041477            | .0237723  |
| child_class               |           |           |       |       |                      |           |
| 1 child                   | .0263952  | .0104961  | 2.51  | 0.013 | .0057081             | .0470823  |
| More than 1 child         | .0215994  | .009001   | 2.40  | 0.017 | .003933              | .0392659  |
| job_status                |           |           |       |       |                      |           |
| Self-employed             | -.0328084 | .0280794  | -1.17 | 0.256 | -.0913276            | .0257109  |

|                           |  |           |          |       |       |           |          |
|---------------------------|--|-----------|----------|-------|-------|-----------|----------|
| Retired                   |  | .0020697  | .0135464 | 0.15  | 0.880 | -.0254995 | .0296389 |
| Unempl., Perm sick, other |  | .0046954  | .0158321 | 0.30  | 0.767 | -.0265466 | .0359375 |
| Homemaker                 |  | .0018847  | .0160842 | 0.12  | 0.908 | -.0313695 | .035139  |
| house_owner               |  |           |          |       |       |           |          |
| Tenant/Subtenant          |  | .026693   | .0094884 | 2.81  | 0.006 | .0078725  | .0455136 |
| Rent free                 |  | .0137342  | .0128158 | 1.07  | 0.291 | -.0122013 | .0396697 |
| country                   |  |           |          |       |       |           |          |
| Germany                   |  | .0337477  | .0138199 | 2.44  | 0.015 | .0066607  | .0608347 |
| Sweden                    |  | .028944   | .0173932 | 1.66  | 0.096 | -.0051471 | .063035  |
| Spain                     |  | .165429   | .018474  | 8.95  | 0.000 | .1292193  | .2016387 |
| Italy                     |  | .1863413  | .0159443 | 11.69 | 0.000 | .155079   | .2176035 |
| France                    |  | .1126873  | .0164352 | 6.86  | 0.000 | .0804728  | .1449017 |
| Denmark                   |  | -.0117426 | .014587  | -0.81 | 0.421 | -.040336  | .0168508 |
| Greece                    |  | .0759309  | .0146548 | 5.18  | 0.000 | .0471896  | .1046723 |
| Switzerland               |  | .0574224  | .0163146 | 3.52  | 0.000 | .0254434  | .0894013 |
| Belgium                   |  | .1088209  | .0140692 | 7.73  | 0.000 | .0812292  | .1364125 |
| Israel                    |  | .061876   | .0193244 | 3.20  | 0.001 | .0239982  | .0997538 |
| Czech Republic            |  | -.0032469 | .0131623 | -0.25 | 0.805 | -.0290448 | .022551  |
| Poland                    |  | .0636741  | .0191511 | 3.32  | 0.001 | .0261376  | .1012107 |
| Luxembourg                |  | .1301429  | .0237436 | 5.48  | 0.000 | .0836058  | .17668   |
| Slovenia                  |  | -.0145213 | .0129802 | -1.12 | 0.263 | -.0399626 | .0109199 |
| Estonia                   |  | .0437583  | .0125568 | 3.48  | 0.000 | .0191473  | .0683692 |
| Croatia                   |  | .0104718  | .0152327 | 0.69  | 0.492 | -.0193841 | .0403277 |

-----  
Note: dy/dx for factor levels is the discrete change from the base level.

MODEL III

```

Multiple-imputation estimates          Imputations      =          5
Logistic regression                   Number of obs    =        21,937
                                       Average RVI      =         0.1337
                                       Largest FMI      =         0.6807
DF adjustment:  Large sample          DF:      min     =         10.27
                                       avg           =       1402343.37
                                       max           =         8.32e+07
Model F test:      Equal FMI          F( 69,18845.8)  =         18.58
Within VCE type:   Robust              Prob > F         =         0.0000
    
```

| dep_by_covid              | Coef.     | Std. Err. | t     | P> t  | [95% Conf. Interval] |           |
|---------------------------|-----------|-----------|-------|-------|----------------------|-----------|
| -----                     |           |           |       |       |                      |           |
| age_cat                   |           |           |       |       |                      |           |
| 60-64                     | -.0330462 | .0727204  | -0.45 | 0.650 | -.1755982            | .1095057  |
| 65-69                     | -.0917262 | .0827394  | -1.11 | 0.268 | -.2542919            | .0708396  |
| 70-74                     | -.0670303 | .0894474  | -0.75 | 0.454 | -.2428907            | .1088301  |
| 75-79                     | -.131521  | .095258   | -1.38 | 0.168 | -.3186732            | .0556312  |
| 80-84                     | -.0790781 | .1016346  | -0.78 | 0.437 | -.278802             | .1206458  |
| >84                       | -.283995  | .1107997  | -2.56 | 0.011 | -.5017088            | -.0662811 |
| education                 |           |           |       |       |                      |           |
| Middle                    | -.0665886 | .0468955  | -1.42 | 0.156 | -.1585288            | .0253515  |
| High                      | -.0726417 | .0533177  | -1.36 | 0.173 | -.1772343            | .0319509  |
| dep_cat_AS                |           |           |       |       |                      |           |
| Low risk                  | .4064374  | .1432501  | 2.84  | 0.005 | .1256648             | .6872101  |
| Middle risk               | .5120157  | .0509634  | 10.05 | 0.000 | .4121272             | .6119042  |
| High risk                 | .6003765  | .0462009  | 12.99 | 0.000 | .5098164             | .6909366  |
| Depressed                 | .7364751  | .1055222  | 6.98  | 0.000 | .5296416             | .9433086  |
| Severely depressed        | 1.019905  | .0908354  | 11.23 | 0.000 | .8418489             | 1.197962  |
| Extremely depressed       | 1.023666  | .1855325  | 5.52  | 0.000 | .6599001             | 1.387432  |
| 1.widow_last2y            | .0769782  | .1092065  | 0.70  | 0.481 | -.1370745            | .2910308  |
| 1.retired_last2y          | .0712718  | .1084655  | 0.66  | 0.515 | -.1488959            | .2914395  |
| 1.heart_att_stroke_last2y | -.0562583 | .1510893  | -0.37 | 0.714 | -.3743082            | .2617916  |
| 1.cancer_last2y           | .1607815  | .131306   | 1.22  | 0.225 | -.1016623            | .4232253  |
| 1.diabetes_ever_diagn     | -.0115159 | .050161   | -0.23 | 0.818 | -.1099108            | .0868791  |
| 1.lung_dis_ever_diagn     | .0427627  | .069213   | 0.62  | 0.539 | -.0952489            | .1807743  |
| 1.hypertens_ever_diagn    | .0605064  | .0404617  | 1.50  | 0.135 | -.0188293            | .139842   |
| 1.cholester_ever_diagn    | -.0073401 | .0538345  | -0.14 | 0.893 | -.1192081            | .1045279  |
| 1.alzheimer_ever_diagn    | -.2108076 | .1255461  | -1.68 | 0.105 | -.4690472            | .0474319  |
| 1.affect_dis_ever_diagn   | .3142415  | .0549963  | 5.71  | 0.000 | .2063259             | .4221572  |
| 1.art_rheum_ever_diagn    | .0508916  | .0535038  | 0.95  | 0.343 | -.0548612            | .1566445  |
| 1.osteoaart_ever_diagn    | .0899509  | .0439966  | 2.04  | 0.042 | .0032022             | .1766997  |
| 1.adl1                    | .0212657  | .0640614  | 0.33  | 0.740 | -.1048753            | .1474067  |
| 1.iadl1                   | .0977939  | .0837067  | 1.17  | 0.269 | -.0880533            | .2836411  |
| bmi_class                 |           |           |       |       |                      |           |
| Overweighted              | -.0229208 | .0479699  | -0.48 | 0.634 | -.1188349            | .0729933  |
| Obese                     | -.1123505 | .0511834  | -2.20 | 0.029 | -.2128501            | -.0118509 |
| fluency                   | -.0085696 | .0035703  | -2.40 | 0.022 | -.0158083            | -.0013308 |
| hhszize                   | -.0906264 | .0255682  | -3.54 | 0.000 | -.1407395            | -.0405133 |
| 1.partner_hh              | .0544278  | .0478007  | 1.14  | 0.255 | -.0392611            | .1481167  |
| child_class               |           |           |       |       |                      |           |
| 1 child                   | .139288   | .0748082  | 1.86  | 0.064 | -.0083004            | .2868764  |
| More than 1 child         | .0777926  | .0657118  | 1.18  | 0.237 | -.0512461            | .2068313  |
| job_status                |           |           |       |       |                      |           |
| Self-employed             | -.281258  | .2114665  | -1.33 | 0.197 | -.7197696            | .1572537  |
| Retired                   | .019685   | .0932008  | 0.21  | 0.834 | -.1706145            | .2099846  |
| Unempl., Perm sick, other | .0287695  | .1068829  | 0.27  | 0.788 | -.182358             | .239897   |
| Homemaker                 | .0445712  | .1091343  | 0.41  | 0.687 | -.1811271            | .2702696  |
| house_owner               |           |           |       |       |                      |           |
| Tenant/Subtenant          | .1655275  | .0594122  | 2.79  | 0.006 | .0479651             | .2830898  |
| Rent free                 | .0837235  | .0821395  | 1.02  | 0.313 | -.0815633            | .2490103  |
| 1.covid_pos               | .0272596  | .0709749  | 0.38  | 0.701 | -.1118487            | .1663679  |
| 1.covid_neg               | .2863207  | .0443501  | 6.46  | 0.000 | .1993961             | .3732453  |
| 1.hosp_covid              | .0613309  | .1015951  | 0.60  | 0.546 | -.1377918            | .2604536  |
| 1.die_covid               | .2249749  | .1061171  | 2.12  | 0.034 | .016989              | .4329609  |
| 1.no_pers_contact         | .1867884  | .0398962  | 4.68  | 0.000 | .1085887             | .2649882  |
| 1.no_soc_contact          | -.6130102 | .1121332  | -5.47 | 0.000 | -.8327921            | -.3932284 |
| 1.help_given              | .1066234  | .0514626  | 2.07  | 0.038 | .0057586             | .2074882  |
| 1.help_received           | .4532382  | .0414972  | 10.92 | 0.000 | .371905              | .5345714  |
| 1.financial_received      | .163295   | .0760142  | 2.15  | 0.032 | .0143088             | .3122813  |
| 1.unempl_covid            | .1447476  | .0966912  | 1.50  | 0.134 | -.0447645            | .3342598  |



|                           |           |          |       |       |           |           |
|---------------------------|-----------|----------|-------|-------|-----------|-----------|
| bmi_class                 |           |          |       |       |           |           |
| Overweighted              | -.0034311 | .0071815 | -0.48 | 0.635 | -.0177906 | .0109284  |
| Obese                     | -.0164329 | .0074526 | -2.20 | 0.028 | -.0310692 | -.0017967 |
| fluency                   |           |          |       |       |           |           |
| hhszise                   | -.0012665 | .0005272 | -2.40 | 0.022 | -.0023353 | -.0001977 |
| 1.partner_hh              | -.0133944 | .0037787 | -3.54 | 0.000 | -.0208005 | -.0059883 |
|                           | .0080217  | .0070248 | 1.14  | 0.253 | -.0057469 | .0217903  |
| child_class               |           |          |       |       |           |           |
| 1 child                   | .0204571  | .0108828 | 1.88  | 0.062 | -.0010301 | .0419443  |
| More than 1 child         | .0112319  | .0093488 | 1.20  | 0.230 | -.0071274 | .0295911  |
| job_status                |           |          |       |       |           |           |
| Self-employed             | -.0380091 | .0271918 | -1.40 | 0.177 | -.0945423 | .0185242  |
| Retired                   | .0028406  | .0136669 | 0.21  | 0.837 | -.0250502 | .0307315  |
| Unempl., Perm sick, other | .0042129  | .0158158 | 0.27  | 0.790 | -.0270252 | .035451   |
| Homemaker                 | .0065648  | .0161224 | 0.41  | 0.688 | -.0267546 | .0398842  |
| house_owner               |           |          |       |       |           |           |
| Tenant/Subtenant          | .0251627  | .0092993 | 2.71  | 0.008 | .0067581  | .0435673  |
| Rent free                 | .0125011  | .0124109 | 1.01  | 0.319 | -.0124607 | .0374629  |
| 1.covid_pos               |           |          |       |       |           |           |
| 1.covid_neg               | .0040532  | .0106154 | 0.38  | 0.703 | -.0167527 | .0248591  |
| 1.hosp_covid              | .0440532  | .0070726 | 6.23  | 0.000 | .0301912  | .0579152  |
| 1.die_covid               | .0091993  | .015461  | 0.59  | 0.552 | -.0211037 | .0395023  |
| 1.no_pers_contact         | .0351017  | .017419  | 2.02  | 0.044 | .000961   | .0692423  |
| 1.no_soc_contact          | .0281871  | .0061323 | 4.60  | 0.000 | .0161673  | .040207   |
| 1.help_given              | -.0773108 | .0117767 | -6.56 | 0.000 | -.1003932 | -.0542284 |
| 1.help_received           | .0160549  | .0078911 | 2.03  | 0.042 | .0005885  | .0315213  |
| 1.financial_received      | .0697997  | .0066032 | 10.57 | 0.000 | .0568576  | .0827418  |
| 1.unempl_covid            | .0249665  | .0120069 | 2.08  | 0.038 | .0014332  | .0484998  |
| 1.never_left_home         | .0221358  | .0152777 | 1.45  | 0.147 | -.0078081 | .0520797  |
| 1.change_illness          | -.0032641 | .0071821 | -0.45 | 0.649 | -.0173411 | .010813   |
|                           | .0839633  | .0094654 | 8.87  | 0.000 | .0654111  | .1025155  |
| country                   |           |          |       |       |           |           |
| Germany                   | .0556821  | .0131922 | 4.22  | 0.000 | .0298255  | .0815387  |
| Sweden                    | .0387748  | .0163391 | 2.37  | 0.018 | .0067502  | .0707995  |
| Spain                     | .1893549  | .0179498 | 10.55 | 0.000 | .1541711  | .2245387  |
| Italy                     | .2072341  | .015484  | 13.38 | 0.000 | .1768687  | .2375994  |
| France                    | .1399083  | .0160019 | 8.74  | 0.000 | .1085437  | .1712729  |
| Denmark                   | .0070059  | .0139849 | 0.50  | 0.616 | -.0204064 | .0344183  |
| Greece                    | .1043761  | .0143532 | 7.27  | 0.000 | .0762196  | .1325326  |
| Switzerland               | .064536   | .0152828 | 4.22  | 0.000 | .0345797  | .0944923  |
| Belgium                   | .1153285  | .0131479 | 8.77  | 0.000 | .0895429  | .141114   |
| Israel                    | .0710454  | .0191436 | 3.71  | 0.000 | .0335211  | .1085697  |
| Czech Republic            | .0180379  | .0125775 | 1.43  | 0.152 | -.0066137 | .0426896  |
| Poland                    | .0846014  | .0187779 | 4.51  | 0.000 | .0477956  | .1214071  |
| Luxembourg                | .110928   | .0215279 | 5.15  | 0.000 | .0687336  | .1531224  |
| Slovenia                  | .0028969  | .0130679 | 0.22  | 0.825 | -.0227162 | .0285101  |
| Estonia                   | .0721992  | .0121221 | 5.96  | 0.000 | .0484401  | .0959582  |
| Croatia                   | .0408713  | .0152855 | 2.67  | 0.008 | .0109117  | .0708309  |

-----  
Note: dy/dx for factor levels is the discrete change from the base level.



**MODEL ESTIMATION: ALL RESPONDENTS**

MODEL IV

|                               |                |   |            |
|-------------------------------|----------------|---|------------|
| Multiple-imputation estimates | Imputations    | = | 5          |
| Logistic regression           | Number of obs  | = | 37,475     |
|                               | Average RVI    | = | 0.1204     |
|                               | Largest FMI    | = | 0.6378     |
| DF adjustment: Large sample   | DF: min        | = | 11.84      |
|                               | avg            | = | 275,871.79 |
|                               | max            | = | 4221617.60 |
| Model F test: Equal FMI       | F( 70,23015.1) | = | 34.30      |
| Within VCE type: Robust       | Prob > F       | = | 0.0000     |

| dep_by_covid              | Coef.     | Std. Err. | t     | P> t  | [95% Conf. Interval] |           |
|---------------------------|-----------|-----------|-------|-------|----------------------|-----------|
| female                    |           |           |       |       |                      |           |
| Female                    | .5342109  | .0353908  | 15.09 | 0.000 | .4648392             | .6035825  |
| age_cat                   |           |           |       |       |                      |           |
| 60-64                     | -.0412338 | .0626645  | -0.66 | 0.511 | -.1640917            | .081624   |
| 65-69                     | -.1208418 | .0719552  | -1.68 | 0.094 | -.2625104            | .0208268  |
| 70-74                     | -.0942599 | .077188   | -1.22 | 0.223 | -.2463545            | .0578348  |
| 75-79                     | -.1700802 | .0814638  | -2.09 | 0.038 | -.3303938            | -.0097666 |
| 80-84                     | -.021669  | .0854222  | -0.25 | 0.800 | -.1896724            | .1463344  |
| >84                       | -.2457506 | .0930855  | -2.64 | 0.009 | -.4287937            | -.0627075 |
| education                 |           |           |       |       |                      |           |
| Middle                    | -.0958257 | .0388249  | -2.47 | 0.014 | -.1719241            | -.0197272 |
| High                      | -.1008951 | .042726   | -2.36 | 0.018 | -.184644             | -.0171462 |
| dep_cat_AS                |           |           |       |       |                      |           |
| Low risk                  | .3775566  | .1070458  | 3.53  | 0.000 | .1677468             | .5873664  |
| Middle risk               | .5090306  | .0425993  | 11.95 | 0.000 | .4255373             | .592524   |
| High risk                 | .5572451  | .0371284  | 15.01 | 0.000 | .484472              | .6300182  |
| Depressed                 | .7201886  | .0875038  | 8.23  | 0.000 | .5486785             | .8916987  |
| Severely depressed        | 1.056127  | .0778229  | 13.57 | 0.000 | .9035875             | 1.208667  |
| Extremely depressed       | .9548794  | .1613504  | 5.92  | 0.000 | .6386152             | 1.271144  |
| 1.widow_last2y            | .1009182  | .099221   | 1.02  | 0.309 | -.0937639            | .2956002  |
| 1.retired_last2y          | .0563236  | .0975227  | 0.58  | 0.570 | -.1461855            | .2588326  |
| 1.heart_att_stroke_last2y | .0577647  | .102891   | 0.56  | 0.579 | -.1533679            | .2688974  |
| 1.cancer_last2y           | .1203421  | .1009012  | 1.19  | 0.237 | -.0806426            | .3213269  |
| 1.diabetes_ever_diagn     | -.0235463 | .0404618  | -0.58 | 0.561 | -.1029403            | .0558476  |
| 1.lung_dis_ever_diagn     | .0560047  | .0593206  | 0.94  | 0.350 | -.0636263            | .1756357  |
| 1.hypertens_ever_diagn    | .0328779  | .033885   | 0.97  | 0.332 | -.0335973            | .0993532  |
| 1.cholester_ever_diagn    | -.0277077 | .0392599  | -0.71 | 0.483 | -.1062897            | .0508743  |
| 1.alzheimer_ever_diagn    | -.2188694 | .0876154  | -2.50 | 0.013 | -.3916391            | -.0460996 |
| 1.affect_dis_ever_diagn   | .3359547  | .0489211  | 6.87  | 0.000 | .2398908             | .4320185  |
| 1.art_rheum_ever_diagn    | .015921   | .0461103  | 0.35  | 0.730 | -.0748932            | .1067352  |
| 1.osteoart_ever_diagn     | .1141015  | .0374564  | 3.05  | 0.003 | .0404177             | .1877852  |
| 1.adl1                    | .0042428  | .0610769  | 0.07  | 0.945 | -.1192529            | .1277385  |
| 1.iadl1                   | .1399788  | .0679382  | 2.06  | 0.062 | -.0082724            | .28823    |
| bmi_class                 |           |           |       |       |                      |           |
| Overweight                | -.041476  | .0390984  | -1.06 | 0.292 | -.1193031            | .0363511  |
| Obese                     | -.0875317 | .041988   | -2.08 | 0.037 | -.1698492            | -.0052142 |
| fluency                   | -.0072179 | .0027661  | -2.61 | 0.011 | -.0127392            | -.0016966 |
| hhszize                   | -.0785636 | .0213448  | -3.68 | 0.000 | -.1203996            | -.0367277 |
| 1.partner_hh              | .036219   | .0410556  | 0.88  | 0.378 | -.0442504            | .1166884  |
| child_class               |           |           |       |       |                      |           |
| 1 child                   | .1480163  | .0633878  | 2.34  | 0.021 | .0225754             | .2734573  |
| More than 1 child         | .0893066  | .0573799  | 1.56  | 0.122 | -.0242134            | .2028265  |
| job_status                |           |           |       |       |                      |           |
| Self-employed             | -.102103  | .1446114  | -0.71 | 0.487 | -.3996074            | .1954014  |
| Retired                   | .0774918  | .0836279  | 0.93  | 0.365 | -.0968403            | .2518239  |
| Unempl., Perm sick, other | .0905649  | .0900935  | 1.01  | 0.316 | -.0874358            | .2685657  |
| Homemaker                 | .0786744  | .1012439  | 0.78  | 0.446 | -.1328334            | .2901822  |
| house_owner               |           |           |       |       |                      |           |
| Tenant/Subtenant          | .1813069  | .0560102  | 3.24  | 0.003 | .0674315             | .2951822  |
| Rent free                 | .0774769  | .0690484  | 1.12  | 0.266 | -.0605094            | .2154632  |
| 1.covid_pos               | .0315726  | .0588886  | 0.54  | 0.592 | -.0838472            | .1469924  |
| 1.covid_neg               | .2939614  | .0371192  | 7.92  | 0.000 | .221209              | .3667138  |
| 1.hosp_covid              | .1247103  | .081815   | 1.52  | 0.127 | -.0356442            | .2850648  |



|                           |  |           |          |       |       |           |           |
|---------------------------|--|-----------|----------|-------|-------|-----------|-----------|
| 1.cancer_last2y           |  | .0155418  | .0133909 | 1.16  | 0.249 | -.0111232 | .0422067  |
| 1.diabetes_ever_diagn     |  | -.0029192 | .0049973 | -0.58 | 0.559 | -.012725  | .0068865  |
| 1.lung_dis_ever_diagn     |  | .0070897  | .0075902 | 0.93  | 0.356 | -.0082211 | .0224004  |
| 1.hypertens_ever_diagn    |  | .0040935  | .0042164 | 0.97  | 0.332 | -.0041782 | .0123651  |
| 1.cholester_ever_diagn    |  | -.0034407 | .0048671 | -0.71 | 0.482 | -.0131822 | .0063008  |
| 1.alzheimer_ever_diagn    |  | -.0256625 | .0096468 | -2.66 | 0.008 | -.0446824 | -.0066427 |
| 1.affect_dis_ever_diagn   |  | .0451363  | .0070461 | 6.41  | 0.000 | .0313008  | .0589717  |
| 1.art_rheum_ever_diagn    |  | .0019944  | .0057836 | 0.34  | 0.731 | -.0093969 | .0133857  |
| 1.osteart_ever_diagn      |  | .0144246  | .0048018 | 3.00  | 0.003 | .0049789  | .0238702  |
| 1.adl2                    |  | .0005503  | .0076291 | 0.07  | 0.943 | -.0148786 | .0159793  |
| 1.iadl2                   |  | .0178803  | .0088469 | 2.02  | 0.066 | -.0014184 | .037179   |
| bmi_class                 |  |           |          |       |       |           |           |
| Overweighted              |  | -.005217  | .0049226 | -1.06 | 0.292 | -.0150149 | .0045808  |
| Obese                     |  | -.0108675 | .0051924 | -2.09 | 0.036 | -.0210477 | -.0006873 |
| fluency                   |  | -.0008992 | .0003444 | -2.61 | 0.011 | -.0015866 | -.0002117 |
| hhszise                   |  | -.0097873 | .0026588 | -3.68 | 0.000 | -.0149986 | -.004576  |
| 1.partner_hh              |  | .0044955  | .0050774 | 0.89  | 0.376 | -.0054563 | .0144473  |
| child_class               |  |           |          |       |       |           |           |
| 1 child                   |  | .0182573  | .0077295 | 2.36  | 0.020 | .0029507  | .0335639  |
| More than 1 child         |  | .0108188  | .0068259 | 1.58  | 0.115 | -.002687  | .0243246  |
| job_status                |  |           |          |       |       |           |           |
| Self-employed             |  | -.0118546 | .0165783 | -0.72 | 0.481 | -.0460169 | .0223078  |
| Retired                   |  | .0094621  | .0101111 | 0.94  | 0.360 | -.011611  | .0305352  |
| Unempl., Perm sick, other |  | .0111203  | .0111135 | 1.00  | 0.318 | -.0108106 | .0330511  |
| Homemaker                 |  | .0096215  | .0123845 | 0.78  | 0.446 | -.0162188 | .0354617  |
| house_owner               |  |           |          |       |       |           |           |
| Tenant/Subtenant          |  | .0234172  | .007509  | 3.12  | 0.004 | .0081402  | .0386941  |
| Rent free                 |  | .0097337  | .0087942 | 1.11  | 0.273 | -.007834  | .0273014  |
| 1.covid_pos               |  | .0039633  | .0074477 | 0.53  | 0.595 | -.0106339 | .0185606  |
| 1.covid_neg               |  | .0383806  | .0050596 | 7.59  | 0.000 | .028464   | .0482972  |
| 1.hosp_covid              |  | .0160526  | .010871  | 1.48  | 0.140 | -.0052543 | .0373594  |
| 1.die_covid               |  | .0329335  | .0118445 | 2.78  | 0.005 | .0097186  | .0561483  |
| 1.no_pers_contact         |  | .0260738  | .0043091 | 6.05  | 0.000 | .0176274  | .0345202  |
| 1.no_soc_contact          |  | -.0383557 | .0079536 | -4.82 | 0.000 | -.0539446 | -.0227668 |
| 1.help_given              |  | .0112802  | .0055765 | 2.02  | 0.043 | .0003505  | .0222099  |
| 1.help_received           |  | .0606339  | .0048372 | 12.53 | 0.000 | .0511531  | .0701147  |
| 1.financial_received      |  | .0188383  | .0084001 | 2.24  | 0.025 | .0023742  | .0353024  |
| 1.unempl_covid            |  | .0375747  | .011209  | 3.35  | 0.001 | .0156048  | .0595446  |
| 1.never_left_home         |  | -.0014754 | .0050974 | -0.29 | 0.772 | -.0114661 | .0085154  |
| 1.change_illness          |  | .0846232  | .0068141 | 12.42 | 0.000 | .0712678  | .0979786  |
| country                   |  |           |          |       |       |           |           |
| Germany                   |  | .0494154  | .0090388 | 5.47  | 0.000 | .0316992  | .0671317  |
| Sweden                    |  | .036617   | .0111551 | 3.28  | 0.001 | .0147532  | .0584807  |
| Spain                     |  | .1592989  | .0124664 | 12.78 | 0.000 | .1348652  | .1837327  |
| Italy                     |  | .1800464  | .0106721 | 16.87 | 0.000 | .1591277  | .2009651  |
| France                    |  | .104198   | .0109637 | 9.50  | 0.000 | .0827094  | .1256866  |
| Denmark                   |  | .0057238  | .0094697 | 0.60  | 0.546 | -.0128384 | .0242859  |
| Greece                    |  | .1007179  | .0099085 | 10.16 | 0.000 | .081295   | .1201407  |
| Switzerland               |  | .0483156  | .0102789 | 4.70  | 0.000 | .0281683  | .0684629  |
| Belgium                   |  | .09179    | .0088317 | 10.39 | 0.000 | .0744786  | .1091014  |
| Israel                    |  | .0674276  | .013508  | 4.99  | 0.000 | .040952   | .0939032  |
| Czech Republic            |  | .0121434  | .00865   | 1.40  | 0.160 | -.0048102 | .0290971  |
| Poland                    |  | .0691202  | .012981  | 5.32  | 0.000 | .0436777  | .0945627  |
| Luxembourg                |  | .0892602  | .014505  | 6.15  | 0.000 | .0608308  | .1176895  |
| Slovenia                  |  | .0102655  | .0091647 | 1.12  | 0.263 | -.0076975 | .0282284  |
| Estonia                   |  | .0641299  | .0084873 | 7.56  | 0.000 | .0474951  | .0807647  |
| Croatia                   |  | .0462122  | .0107591 | 4.30  | 0.000 | .0251246  | .0672998  |

-----  
Note: dy/dx for factor levels is the discrete change from the base level.

## TESTING GENDER DIFFERENCES

|                               |                 |   |            |
|-------------------------------|-----------------|---|------------|
| Multiple-imputation estimates | Imputations     | = | 5          |
| Logistic regression           | Number of obs   | = | 37,475     |
|                               | Average RVI     | = | 0.1417     |
|                               | Largest FMI     | = | 0.6815     |
| DF adjustment: Large sample   | DF: min         | = | 10.25      |
|                               | avg             | = | 342,734.88 |
|                               | max             | = | 1.93e+07   |
| Model F test: Equal FMI       | F( 123,31005.3) | = | 19.37      |
| Within VCE type: Robust       | Prob > F        | = | 0.0000     |

| dep_by_covid                   | Coef.     | Std. Err. | t     | P> t  | [95% Conf. Interval] |           |
|--------------------------------|-----------|-----------|-------|-------|----------------------|-----------|
| female                         |           |           |       |       |                      |           |
| Female                         | .7045974  | .2352912  | 2.99  | 0.003 | .2431677             | 1.166027  |
| age_cat#female                 |           |           |       |       |                      |           |
| 60-64#Male                     | -.0784651 | .1243188  | -0.63 | 0.528 | -.3222064            | .1652761  |
| 60-64#Female                   | -.0272338 | .0724868  | -0.38 | 0.707 | -.1693259            | .1148583  |
| 65-69#Male                     | -.1808138 | .1415751  | -1.28 | 0.202 | -.4592843            | .0976568  |
| 65-69#Female                   | -.0856327 | .0822632  | -1.04 | 0.298 | -.2472663            | .0760009  |
| 70-74#Male                     | -.1426314 | .1475538  | -0.97 | 0.334 | -.4326392            | .1473764  |
| 70-74#Female                   | -.0562312 | .0889402  | -0.63 | 0.528 | -.2311175            | .1186551  |
| 75-79#Male                     | -.2504183 | .1541214  | -1.62 | 0.105 | -.5532365            | .0523999  |
| 75-79#Female                   | -.1183158 | .0946636  | -1.25 | 0.212 | -.3043126            | .0676811  |
| 80-84#Male                     | .0910988  | .1562356  | 0.58  | 0.560 | -.2154722            | .3976699  |
| 80-84#Female                   | -.0662328 | .1010152  | -0.66 | 0.512 | -.2647507            | .1322851  |
| >84#Male                       | -.1786567 | .170482   | -1.05 | 0.295 | -.5133624            | .156049   |
| >84#Female                     | -.2632971 | .1097849  | -2.40 | 0.017 | -.4790135            | -.0475807 |
| education#female               |           |           |       |       |                      |           |
| Middle#Male                    | -.1796988 | .0696028  | -2.58 | 0.010 | -.3161598            | -.0432378 |
| Middle#Female                  | -.0655353 | .0465143  | -1.41 | 0.159 | -.1567433            | .0256727  |
| High#Male                      | -.16151   | .0732151  | -2.21 | 0.027 | -.3050403            | -.0179798 |
| High#Female                    | -.0763192 | .0528233  | -1.44 | 0.149 | -.1799605            | .0273221  |
| dep_cat_AS#female              |           |           |       |       |                      |           |
| Low risk#Male                  | .3444329  | .1621252  | 2.12  | 0.034 | .0266552             | .6622106  |
| Low risk#Female                | .4038041  | .1429154  | 2.83  | 0.005 | .1236876             | .6839206  |
| Middle risk#Male               | .4983638  | .0805436  | 6.19  | 0.000 | .3404997             | .6562279  |
| Middle risk#Female             | .5170022  | .0508293  | 10.17 | 0.000 | .4173775             | .616627   |
| High risk#Male                 | .4414416  | .0640758  | 6.89  | 0.000 | .3158531             | .5670301  |
| High risk#Female               | .6035564  | .0460104  | 13.12 | 0.000 | .5133716             | .6937413  |
| Depressed#Male                 | .7071851  | .1566037  | 4.52  | 0.000 | .4002465             | 1.014124  |
| Depressed#Female               | .7284881  | .1051945  | 6.93  | 0.000 | .5222947             | .9346814  |
| Severely depressed#Male        | 1.210324  | .1489043  | 8.13  | 0.000 | .9184633             | 1.502185  |
| Severely depressed#Female      | 1.023545  | .0903433  | 11.33 | 0.000 | .8464591             | 1.200631  |
| Extremely depressed#Male       | .8639754  | .3365994  | 2.57  | 0.010 | .2042349             | 1.523716  |
| Extremely depressed#Female     | 1.007766  | .1844039  | 5.46  | 0.000 | .6461979             | 1.369333  |
| widow_last2y#female            |           |           |       |       |                      |           |
| 1#Male                         | .141341   | .2176727  | 0.65  | 0.516 | -.2862446            | .5689266  |
| 1#Female                       | .0706833  | .1090664  | 0.65  | 0.517 | -.1430928            | .2844594  |
| retired_last2y#female          |           |           |       |       |                      |           |
| 1#Male                         | .034871   | .1818757  | 0.19  | 0.850 | -.3426923            | .4124343  |
| 1#Female                       | .0776138  | .1076055  | 0.72  | 0.475 | -.1405167            | .2957444  |
| heart_att_stroke_last2y#female |           |           |       |       |                      |           |
| 1#Male                         | .1630275  | .1285644  | 1.27  | 0.206 | -.0905985            | .4166535  |
| 1#Female                       | -.0549568 | .1497822  | -0.37 | 0.718 | -.3695843            | .2596706  |
| cancer_last2y#female           |           |           |       |       |                      |           |
| 1#Male                         | .0463874  | .172754   | 0.27  | 0.790 | -.3015691            | .3943439  |
| 1#Female                       | .1654296  | .1311292  | 1.26  | 0.212 | -.0967386            | .4275977  |
| diabetes_ever_diagn#female     |           |           |       |       |                      |           |
| 1#Male                         | -.045527  | .0675037  | -0.67 | 0.500 | -.1778735            | .0868196  |
| 1#Female                       | -.0106657 | .0500654  | -0.21 | 0.831 | -.1088778            | .0875463  |
| lung_dis_ever_diagn#female     |           |           |       |       |                      |           |
| 1#Male                         | .052749   | .1022894  | 0.52  | 0.608 | -.1523179            | .2578159  |
| 1#Female                       | .0450108  | .0691257  | 0.65  | 0.517 | -.0928375            | .182859   |
| hypertens_ever_diagn#female    |           |           |       |       |                      |           |
| 1#Male                         | .0051867  | .060446   | 0.09  | 0.932 | -.1133387            | .1237121  |
| 1#Female                       | .0526366  | .0404151  | 1.30  | 0.193 | -.0266125            | .1318857  |

|                                  |           |          |       |       |           |           |  |
|----------------------------------|-----------|----------|-------|-------|-----------|-----------|--|
| cholester_ever_diagn#female      |           |          |       |       |           |           |  |
| 1#Male                           | -.0750894 | .0694306 | -1.08 | 0.283 | -.2133647 | .0631859  |  |
| 1#Female                         | -.0090021 | .0531422 | -0.17 | 0.867 | -.1191362 | .1011321  |  |
| alzheimer_ever_diagn#female      |           |          |       |       |           |           |  |
| 1#Male                           | -.2276675 | .2152197 | -1.06 | 0.308 | -.690295  | .23496    |  |
| 1#Female                         | -.2100717 | .125493  | -1.67 | 0.106 | -.4683472 | .0482038  |  |
| affect_dis_ever_diagn#female     |           |          |       |       |           |           |  |
| 1#Male                           | .391696   | .1015294 | 3.86  | 0.000 | .1925638  | .5908281  |  |
| 1#Female                         | .320403   | .0547751 | 5.85  | 0.000 | .2129327  | .4278732  |  |
| art_rheum_ever_diagn#female      |           |          |       |       |           |           |  |
| 1#Male                           | -.0450617 | .0931938 | -0.48 | 0.629 | -.2278531 | .1377298  |  |
| 1#Female                         | .0431742  | .0528215 | 0.82  | 0.415 | -.0611094 | .1474578  |  |
| osteoart_ever_diagn#female       |           |          |       |       |           |           |  |
| 1#Male                           | .1586954  | .0750393 | 2.11  | 0.036 | .0106641  | .3067267  |  |
| 1#Female                         | .1016727  | .0433129 | 2.35  | 0.020 | .0163394  | .1870059  |  |
| adl2#female                      |           |          |       |       |           |           |  |
| 1#Male                           | -.0448743 | .1157342 | -0.39 | 0.701 | -.2799863 | .1902377  |  |
| 1#Female                         | .0303577  | .0639041 | 0.48  | 0.635 | -.0954738 | .1561892  |  |
| iadl2#female                     |           |          |       |       |           |           |  |
| 1#Male                           | .2605723  | .0898555 | 2.90  | 0.004 | .0837106  | .4374341  |  |
| 1#Female                         | .0953732  | .0835918 | 1.14  | 0.280 | -.0902761 | .2810224  |  |
| bmi_class#female                 |           |          |       |       |           |           |  |
| Overweighted#Male                | -.0483444 | .065811  | -0.73 | 0.463 | -.1776497 | .0809608  |  |
| Overweighted#Female              | -.0288483 | .0478783 | -0.60 | 0.549 | -.1246038 | .0669072  |  |
| Obese#Male                       | .0207253  | .079541  | 0.26  | 0.794 | -.1353133 | .1767638  |  |
| Obese#Female                     | -.1158338 | .0506561 | -2.29 | 0.022 | -.215265  | -.0164025 |  |
| female#c.fluency                 |           |          |       |       |           |           |  |
| Male                             | -.0074891 | .0050917 | -1.47 | 0.150 | -.0178112 | .0028329  |  |
| Female                           | -.0075634 | .0034668 | -2.18 | 0.035 | -.014568  | -.0005588 |  |
| female#c.hhsz                    |           |          |       |       |           |           |  |
| Male                             | -.04286   | .0377584 | -1.14 | 0.256 | -.1168725 | .0311524  |  |
| Female                           | -.0927364 | .0253983 | -3.65 | 0.000 | -.1425163 | -.0429566 |  |
| partner_hh#female                |           |          |       |       |           |           |  |
| 1#Male                           | -.088368  | .0824878 | -1.07 | 0.284 | -.2500561 | .0733201  |  |
| 1#Female                         | .05604    | .0476561 | 1.18  | 0.240 | -.0373658 | .1494457  |  |
| child_class#female               |           |          |       |       |           |           |  |
| 1 child#Male                     | .1954521  | .1271171 | 1.54  | 0.132 | -.061087  | .4519912  |  |
| 1 child#Female                   | .1387103  | .0748979 | 1.85  | 0.066 | -.0091424 | .286563   |  |
| More than 1 child#Male           | .1398741  | .1126765 | 1.24  | 0.221 | -.08671   | .3664582  |  |
| More than 1 child#Female         | .0804676  | .0653489 | 1.23  | 0.219 | -.0478449 | .2087801  |  |
| job_status#female                |           |          |       |       |           |           |  |
| Self-employed#Male               | .1532004  | .1930202 | 0.79  | 0.432 | -.235799  | .5421998  |  |
| Self-employed#Female             | -.2855485 | .2114858 | -1.35 | 0.191 | -.7241785 | .1530814  |  |
| Retired#Male                     | .1774429  | .1465556 | 1.21  | 0.235 | -.1212114 | .4760972  |  |
| Retired#Female                   | .0243624  | .0927242 | 0.26  | 0.795 | -.1650472 | .213772   |  |
| Unempl., Perm sick, other#Male   | .2776867  | .1735335 | 1.60  | 0.113 | -.0675885 | .6229618  |  |
| Unempl., Perm sick, other#Female | .0260695  | .1067323 | 0.24  | 0.807 | -.1848201 | .2369591  |  |
| Homemaker#Male                   | .2715128  | .5622097 | 0.48  | 0.631 | -.8567854 | 1.399811  |  |
| Homemaker#Female                 | .0321325  | .1078154 | 0.30  | 0.768 | -.1908144 | .2550793  |  |
| house_owner#female               |           |          |       |       |           |           |  |
| Tenant/Subtenant#Male            | .1768275  | .1018927 | 1.74  | 0.092 | -.030212  | .3838671  |  |
| Tenant/Subtenant#Female          | .1802556  | .0589018 | 3.06  | 0.003 | .0636469  | .2968642  |  |
| Rent free#Male                   | .0446272  | .123744  | 0.36  | 0.719 | -.1989159 | .2881702  |  |
| Rent free#Female                 | .0909115  | .0807385 | 1.13  | 0.265 | -.0710489 | .252872   |  |
| covid_pos#female                 |           |          |       |       |           |           |  |
| 1#Male                           | .0176171  | .1055449 | 0.17  | 0.867 | -.1892499 | .2244841  |  |
| 1#Female                         | .0367342  | .07085   | 0.52  | 0.604 | -.1021293 | .1755976  |  |
| covid_neg#female                 |           |          |       |       |           |           |  |
| 1#Male                           | .2834172  | .0664017 | 4.27  | 0.000 | .1532721  | .4135624  |  |
| 1#Female                         | .2974645  | .0438261 | 6.79  | 0.000 | .2115669  | .3833621  |  |
| hosp_covid#female                |           |          |       |       |           |           |  |
| 1#Male                           | .2443292  | .1373519 | 1.78  | 0.075 | -.0248771 | .5135355  |  |
| 1#Female                         | .0673926  | .1018126 | 0.66  | 0.508 | -.1321565 | .2669418  |  |

|                           |           |          |        |       |           |           |  |
|---------------------------|-----------|----------|--------|-------|-----------|-----------|--|
| die_covid#female          |           |          |        |       |           |           |  |
| 1#Male                    | .2628871  | .1348215 | 1.95   | 0.051 | -.0013591 | .5271333  |  |
| 1#Female                  | .2348532  | .1062219 | 2.21   | 0.027 | .0266621  | .4430443  |  |
| no_pers_contact#female    |           |          |        |       |           |           |  |
| 1#Male                    | .2322792  | .0586294 | 3.96   | 0.000 | .1173586  | .3471999  |  |
| 1#Female                  | .1882916  | .0397747 | 4.73   | 0.000 | .1103301  | .266253   |  |
| no_soc_contact#female     |           |          |        |       |           |           |  |
| 1#Male                    | -.091073  | .1047792 | -0.87  | 0.385 | -.2964394 | .1142933  |  |
| 1#Female                  | -.6039149 | .1118596 | -5.40  | 0.000 | -.8231595 | -.3846702 |  |
| help_given#female         |           |          |        |       |           |           |  |
| 1#Male                    | .0288768  | .0810277 | 0.36   | 0.722 | -.1299355 | .187689   |  |
| 1#Female                  | .1151744  | .0512819 | 2.25   | 0.025 | .0146637  | .2156851  |  |
| help_received#female      |           |          |        |       |           |           |  |
| 1#Male                    | .4689629  | .0642517 | 7.30   | 0.000 | .3430313  | .5948944  |  |
| 1#Female                  | .45322    | .0412173 | 11.00  | 0.000 | .3724353  | .5340046  |  |
| financial_received#female |           |          |        |       |           |           |  |
| 1#Male                    | .1981314  | .1012802 | 1.96   | 0.050 | -.0003771 | .3966398  |  |
| 1#Female                  | .1304874  | .0730858 | 1.79   | 0.074 | -.0127596 | .2737345  |  |
| unempl_covid#female       |           |          |        |       |           |           |  |
| 1#Male                    | .5486074  | .129773  | 4.23   | 0.000 | .2942488  | .802966   |  |
| 1#Female                  | .1534092  | .0963959 | 1.59   | 0.112 | -.0355237 | .3423422  |  |
| never_left_home#female    |           |          |        |       |           |           |  |
| 1#Male                    | .0624625  | .0745616 | 0.84   | 0.402 | -.0836817 | .2086068  |  |
| 1#Female                  | -.0369469 | .0485651 | -0.76  | 0.447 | -.1321365 | .0582428  |  |
| change_illness#female     |           |          |        |       |           |           |  |
| 1#Male                    | .754589   | .0723716 | 10.43  | 0.000 | .6127377  | .8964403  |  |
| 1#Female                  | .5170629  | .0528391 | 9.79   | 0.000 | .4134983  | .6206276  |  |
| country                   |           |          |        |       |           |           |  |
| Germany                   | .5018976  | .0960454 | 5.23   | 0.000 | .3136478  | .6901474  |  |
| Sweden                    | .3855198  | .1165131 | 3.31   | 0.001 | .1571568  | .6138827  |  |
| Spain                     | 1.264495  | .1004566 | 12.59  | 0.000 | 1.067602  | 1.461388  |  |
| Italy                     | 1.386118  | .093016  | 14.90  | 0.000 | 1.203792  | 1.568445  |  |
| France                    | .9284608  | .0995242 | 9.33   | 0.000 | .7333917  | 1.12353   |  |
| Denmark                   | .0676036  | .1153666 | 0.59   | 0.558 | -.1585271 | .2937344  |  |
| Greece                    | .9022699  | .0957653 | 9.42   | 0.000 | .7145477  | 1.089992  |  |
| Switzerland               | .5058375  | .1053544 | 4.80   | 0.000 | .2993415  | .7123336  |  |
| Belgium                   | .8376977  | .0897551 | 9.33   | 0.000 | .6617595  | 1.013636  |  |
| Israel                    | .6500795  | .1237197 | 5.25   | 0.000 | .4075857  | .8925733  |  |
| Czech Republic            | .1301934  | .1028916 | 1.27   | 0.206 | -.0714716 | .3318584  |  |
| Poland                    | .6641456  | .1186717 | 5.60   | 0.000 | .43155    | .8967411  |  |
| Luxembourg                | .8176327  | .122008  | 6.70   | 0.000 | .5785002  | 1.056765  |  |
| Slovenia                  | .1194507  | .1096604 | 1.09   | 0.276 | -.095486  | .3343874  |  |
| Estonia                   | .6241393  | .0907299 | 6.88   | 0.000 | .4463113  | .8019673  |  |
| Croatia                   | .4721256  | .1108791 | 4.26   | 0.000 | .254799   | .6894521  |  |
| _cons                     | -3.390741 | .219547  | -15.44 | 0.000 | -3.821395 | -2.960087 |  |

```

-----
Multiple-imputation estimates          Imputations      =          5
Average marginal effects              Number of obs    =       37,475
                                      Average RVI      =         0.0377
                                      Largest FMI     =         0.1208
DF adjustment:  Large sample          DF:              =
                                      min              =       302.56
                                      avg              =     1,310.52
Within VCE type: Delta-method        max              =     7,838.46

```

```

Expression   : Pr(dep_by_covid), predict(pr)
dy/dx w.r.t. : 2.age_cat 3.age_cat 4.age_cat 5.age_cat 6.age_cat 7.age_cat
1._at       : female           =           0
2._at       : female           =           1

```

|           | dy/dx          | Std. Err. | t     | P> t  | [95% Conf. Interval] |          |
|-----------|----------------|-----------|-------|-------|----------------------|----------|
| -----     |                |           |       |       |                      |          |
| 1.age_cat | (base outcome) |           |       |       |                      |          |
| -----     |                |           |       |       |                      |          |
| 2.age_cat |                |           |       |       |                      |          |
| _at       |                |           |       |       |                      |          |
| 1         | -.0083847      | .0134171  | -0.62 | 0.532 | -.0346932            | .0179237 |
| 2         | -.0039857      | .0106166  | -0.38 | 0.707 | -.0247971            | .0168257 |
| -----     |                |           |       |       |                      |          |

| 3.age_cat |  |           |          |       |       |           |           |
|-----------|--|-----------|----------|-------|-------|-----------|-----------|
| _at       |  |           |          |       |       |           |           |
| 1         |  | -.0186712 | .0150872 | -1.24 | 0.217 | -.0483604 | .011018   |
| 2         |  | -.012325  | .0119571 | -1.03 | 0.303 | -.0358208 | .0111709  |
| -----     |  |           |          |       |       |           |           |
| 4.age_cat |  |           |          |       |       |           |           |
| _at       |  |           |          |       |       |           |           |
| 1         |  | -.0149149 | .0157601 | -0.95 | 0.345 | -.0458982 | .0160684  |
| 2         |  | -.0081608 | .0129652 | -0.63 | 0.529 | -.033656  | .0173344  |
| -----     |  |           |          |       |       |           |           |
| 5.age_cat |  |           |          |       |       |           |           |
| _at       |  |           |          |       |       |           |           |
| 1         |  | -.0252654 | .0161051 | -1.57 | 0.117 | -.0569248 | .006394   |
| 2         |  | -.0168752 | .0136142 | -1.24 | 0.216 | -.0436275 | .0098771  |
| -----     |  |           |          |       |       |           |           |
| 6.age_cat |  |           |          |       |       |           |           |
| _at       |  |           |          |       |       |           |           |
| 1         |  | .0101672  | .0173424 | 0.59  | 0.558 | -.0238577 | .0441921  |
| 2         |  | -.0095818 | .0146376 | -0.65 | 0.513 | -.0383493 | .0191858  |
| -----     |  |           |          |       |       |           |           |
| 7.age_cat |  |           |          |       |       |           |           |
| _at       |  |           |          |       |       |           |           |
| 1         |  | -.0184577 | .0178206 | -1.04 | 0.301 | -.0534558 | .0165403  |
| 2         |  | -.0360707 | .0150631 | -2.39 | 0.017 | -.0656714 | -.0064701 |

Note: dy/dx for factor levels is the discrete change from the base level.

|                               |               |   |          |
|-------------------------------|---------------|---|----------|
| Multiple-imputation estimates | Imputations   | = | 5        |
| Average marginal effects      | Number of obs | = | 37,475   |
|                               | Average RVI   | = | 0.0317   |
|                               | Largest FMI   | = | 0.0622   |
| DF adjustment: Large sample   | DF: min       | = | 1,094.56 |
|                               | avg           | = | 2,486.46 |
| Within VCE type: Delta-method | max           | = | 3,884.60 |

Expression : Pr(dep\_by\_covid), predict(pr)  
dy/dx w.r.t. : 2.education 3.education  
1.\_at : female = 0  
2.\_at : female = 1

|             | dy/dx          | Std. Err. | t     | P> t  | [95% Conf. Interval] |           |
|-------------|----------------|-----------|-------|-------|----------------------|-----------|
| 1.education | (base outcome) |           |       |       |                      |           |
| -----       |                |           |       |       |                      |           |
| 2.education |                |           |       |       |                      |           |
| _at         |                |           |       |       |                      |           |
| 1           | -.0183741      | .0071698  | -2.56 | 0.010 | -.0324335            | -.0043147 |
| 2           | -.0093015      | .0066069  | -1.41 | 0.159 | -.022257             | .0036541  |
| -----       |                |           |       |       |                      |           |
| 3.education |                |           |       |       |                      |           |
| _at         |                |           |       |       |                      |           |
| 1           | -.0166102      | .0075331  | -2.20 | 0.028 | -.0313793            | -.0018411 |
| 2           | -.0107996      | .007461   | -1.45 | 0.148 | -.025439             | .0038399  |

Note: dy/dx for factor levels is the discrete change from the base level.

|                               |               |   |            |
|-------------------------------|---------------|---|------------|
| Multiple-imputation estimates | Imputations   | = | 5          |
| Average marginal effects      | Number of obs | = | 37,475     |
|                               | Average RVI   | = | 0.0133     |
|                               | Largest FMI   | = | 0.0369     |
| DF adjustment: Large sample   | DF: min       | = | 3,046.41   |
|                               | avg           | = | 34,770.42  |
| Within VCE type: Delta-method | max           | = | 138,637.18 |

Expression : Pr(dep\_by\_covid), predict(pr)  
dy/dx w.r.t. : 2.dep\_cat\_AS 3.dep\_cat\_AS 4.dep\_cat\_AS 5.dep\_cat\_AS 6.dep\_cat\_AS 7.dep\_cat\_AS  
1.\_at : female = 0  
2.\_at : female = 1

|              | dy/dx          | Std. Err. | t    | P> t  | [95% Conf. Interval] |          |
|--------------|----------------|-----------|------|-------|----------------------|----------|
| 1.dep_cat_AS | (base outcome) |           |      |       |                      |          |
| -----        |                |           |      |       |                      |          |
| 2.dep_cat_AS |                |           |      |       |                      |          |
| _at          |                |           |      |       |                      |          |
| 1            | .0315739       | .0164775  | 1.92 | 0.055 | -.0007237            | .0638716 |
| 2            | .0520082       | .0204779  | 2.54 | 0.011 | .0118711             | .0921452 |

| -----        |  |          |          |       |       |          |          |
|--------------|--|----------|----------|-------|-------|----------|----------|
| 3.dep_cat_AS |  |          |          |       |       |          |          |
| _at          |  |          |          |       |       |          |          |
| 1            |  | .0482542 | .0086049 | 5.61  | 0.000 | .0313872 | .0651213 |
| 2            |  | .0689403 | .0069556 | 9.91  | 0.000 | .0553075 | .0825731 |
| -----        |  |          |          |       |       |          |          |
| 4.dep_cat_AS |  |          |          |       |       |          |          |
| _at          |  |          |          |       |       |          |          |
| 1            |  | .041886  | .0063692 | 6.58  | 0.000 | .0294007 | .0543713 |
| 2            |  | .082598  | .0062385 | 13.24 | 0.000 | .0703695 | .0948264 |
| -----        |  |          |          |       |       |          |          |
| 5.dep_cat_AS |  |          |          |       |       |          |          |
| _at          |  |          |          |       |       |          |          |
| 1            |  | .0736397 | .0198685 | 3.71  | 0.000 | .0346979 | .1125815 |
| 2            |  | .1033863 | .0174665 | 5.92  | 0.000 | .0691499 | .1376227 |
| -----        |  |          |          |       |       |          |          |
| 6.dep_cat_AS |  |          |          |       |       |          |          |
| _at          |  |          |          |       |       |          |          |
| 1            |  | .1484068 | .0242676 | 6.12  | 0.000 | .1008393 | .1959744 |
| 2            |  | .1573158 | .0166248 | 9.46  | 0.000 | .1247286 | .1899031 |
| -----        |  |          |          |       |       |          |          |
| 7.dep_cat_AS |  |          |          |       |       |          |          |
| _at          |  |          |          |       |       |          |          |
| 1            |  | .0948878 | .0473136 | 2.01  | 0.045 | .0021515 | .1876241 |
| 2            |  | .1542931 | .0351159 | 4.39  | 0.000 | .0854399 | .2231463 |
| -----        |  |          |          |       |       |          |          |

Note: dy/dx for factor levels is the discrete change from the base level.

|                               |               |   |           |
|-------------------------------|---------------|---|-----------|
| Multiple-imputation estimates | Imputations   | = | 5         |
| Average marginal effects      | Number of obs | = | 37,475    |
|                               | Average RVI   | = | 0.0516    |
|                               | Largest FMI   | = | 0.0863    |
| DF adjustment: Large sample   | DF: min       | = | 579.20    |
|                               | avg           | = | 13,135.29 |
| Within VCE type: Delta-method | max           | = | 25,691.39 |

Expression : Pr(dep\_by\_covid), predict(pr)  
dy/dx w.r.t. : 1.widow\_last2y  
1.\_at : female = 0  
2.\_at : female = 1

| -----                                        |  |          |          |      |       |           |          |
|----------------------------------------------|--|----------|----------|------|-------|-----------|----------|
| dy/dx Std. Err. t P> t  [95% Conf. Interval] |  |          |          |      |       |           |          |
| -----                                        |  |          |          |      |       |           |          |
| 0.widow_1~2y   (base outcome)                |  |          |          |      |       |           |          |
| -----                                        |  |          |          |      |       |           |          |
| 1.widow_1~2y                                 |  |          |          |      |       |           |          |
| _at                                          |  |          |          |      |       |           |          |
| 1                                            |  | .0150082 | .0239583 | 0.63 | 0.531 | -.0320475 | .062064  |
| 2                                            |  | .0101469 | .0159391 | 0.64 | 0.524 | -.0210946 | .0413884 |
| -----                                        |  |          |          |      |       |           |          |

Note: dy/dx for factor levels is the discrete change from the base level.

|                               |               |   |        |
|-------------------------------|---------------|---|--------|
| Multiple-imputation estimates | Imputations   | = | 5      |
| Average marginal effects      | Number of obs | = | 37,475 |
|                               | Average RVI   | = | 0.6334 |
|                               | Largest FMI   | = | 0.4847 |
| DF adjustment: Large sample   | DF: min       | = | 20.89  |
|                               | avg           | = | 28.94  |
| Within VCE type: Delta-method | max           | = | 36.99  |

Expression : Pr(dep\_by\_covid), predict(pr)  
dy/dx w.r.t. : 1.retired\_last2y  
1.\_at : female = 0  
2.\_at : female = 1

| -----                                        |  |          |          |      |       |           |          |
|----------------------------------------------|--|----------|----------|------|-------|-----------|----------|
| dy/dx Std. Err. t P> t  [95% Conf. Interval] |  |          |          |      |       |           |          |
| -----                                        |  |          |          |      |       |           |          |
| 0.retired~2y   (base outcome)                |  |          |          |      |       |           |          |
| -----                                        |  |          |          |      |       |           |          |
| 1.retired~2y                                 |  |          |          |      |       |           |          |
| _at                                          |  |          |          |      |       |           |          |
| 1                                            |  | .0039249 | .0188834 | 0.21 | 0.837 | -.0353578 | .0432077 |
| 2                                            |  | .0112244 | .0157125 | 0.71 | 0.479 | -.0206124 | .0430612 |
| -----                                        |  |          |          |      |       |           |          |

Note: dy/dx for factor levels is the discrete change from the base level.



```

Multiple-imputation estimates      Imputations      =      5
Average marginal effects         Number of obs    =    37,475
                                Average RVI      =    0.5343
                                Largest FMI       =    0.5205
DF adjustment:  Large sample     DF:      min    =    18.09
                                avg              =    94.13
                                max              =   170.17
Within VCE type: Delta-method

```

```

Expression : Pr(dep_by_covid), predict(pr)
dy/dx w.r.t. : 1.heart_att_stroke_last2y
1._at      : female          =      0
2._at      : female          =      1

```

|              | dy/dx          | Std. Err. | t     | P> t  | [95% Conf. Interval] |          |
|--------------|----------------|-----------|-------|-------|----------------------|----------|
| -----        |                |           |       |       |                      |          |
| 0.heart_a~2y | (base outcome) |           |       |       |                      |          |
| -----        |                |           |       |       |                      |          |
| 1.heart_a~2y |                |           |       |       |                      |          |
| _at          |                |           |       |       |                      |          |
| 1            | .0173934       | .0143742  | 1.21  | 0.228 | -.0109813            | .0457681 |
| 2            | -.0073741      | .020497   | -0.36 | 0.723 | -.0504214            | .0356731 |

Note: dy/dx for factor levels is the discrete change from the base level.

```

Multiple-imputation estimates      Imputations      =      5
Average marginal effects         Number of obs    =    37,475
                                Average RVI      =    0.3925
                                Largest FMI       =    0.3390
DF adjustment:  Large sample     DF:      min    =    42.08
                                avg              =    52.19
                                max              =    62.30
Within VCE type: Delta-method

```

```

Expression : Pr(dep_by_covid), predict(pr)
dy/dx w.r.t. : 1.cancer_last2y
1._at      : female          =      0
2._at      : female          =      1

```

|              | dy/dx          | Std. Err. | t    | P> t  | [95% Conf. Interval] |          |
|--------------|----------------|-----------|------|-------|----------------------|----------|
| -----        |                |           |      |       |                      |          |
| 0.cancer_~2y | (base outcome) |           |      |       |                      |          |
| -----        |                |           |      |       |                      |          |
| 1.cancer_~2y |                |           |      |       |                      |          |
| _at          |                |           |      |       |                      |          |
| 1            | .0049265       | .0181061  | 0.27 | 0.787 | -.031611             | .041464  |
| 2            | .024408        | .020072   | 1.22 | 0.229 | -.0157115            | .0645276 |

Note: dy/dx for factor levels is the discrete change from the base level.

```

Multiple-imputation estimates      Imputations      =      5
Average marginal effects         Number of obs    =    37,475
                                Average RVI      =    0.0443
                                Largest FMI       =    0.0551
DF adjustment:  Large sample     DF:      min    =   1,386.89
                                avg              =   2,777.87
                                max              =   4,168.85
Within VCE type: Delta-method

```

```

Expression : Pr(dep_by_covid), predict(pr)
dy/dx w.r.t. : 1.diabetes_ever_diagn
1._at      : female          =      0
2._at      : female          =      1

```

|              | dy/dx          | Std. Err. | t     | P> t  | [95% Conf. Interval] |          |
|--------------|----------------|-----------|-------|-------|----------------------|----------|
| -----        |                |           |       |       |                      |          |
| 0.diabetes~n | (base outcome) |           |       |       |                      |          |
| -----        |                |           |       |       |                      |          |
| 1.diabetes~n |                |           |       |       |                      |          |
| _at          |                |           |       |       |                      |          |
| 1            | -.0045573      | .0067073  | -0.68 | 0.497 | -.0177073            | .0085926 |
| 2            | -.0014974      | .0070271  | -0.21 | 0.831 | -.0152823            | .0122875 |

Note: dy/dx for factor levels is the discrete change from the base level.

```

Multiple-imputation estimates      Imputations      =      5
Average marginal effects         Number of obs    =    37,475
                                Average RVI      =    0.3452
                                Largest FMI       =    0.2974
DF adjustment:   Large sample    DF:   min       =    54.10
                                avg         =    61.57
                                max         =    69.04
Within VCE type: Delta-method

```

```

Expression   : Pr(dep_by_covid), predict(pr)
dy/dx w.r.t. : 1.lung_dis_ever_diagn
1._at       : female           =      0
2._at       : female           =      1

```

|              | dy/dx          | Std. Err. | t    | P> t  | [95% Conf. Interval] |          |
|--------------|----------------|-----------|------|-------|----------------------|----------|
| -----+-----  |                |           |      |       |                      |          |
| 0.lung_dis~n | (base outcome) |           |      |       |                      |          |
| -----+-----  |                |           |      |       |                      |          |
| 1.lung_dis~n |                |           |      |       |                      |          |
| _at          |                |           |      |       |                      |          |
| 1            | .0054355       | .0106186  | 0.51 | 0.611 | -.0158526            | .0267236 |
| 2            | .0064338       | .0099539  | 0.65 | 0.520 | -.0134235            | .0262911 |

Note: dy/dx for factor levels is the discrete change from the base level.

```

Multiple-imputation estimates      Imputations      =      5
Average marginal effects         Number of obs    =    37,475
                                Average RVI      =    0.0405
                                Largest FMI       =    0.0402
DF adjustment:   Large sample    DF:   min       =   2,568.28
                                avg         =   2,629.59
                                max         =   2,690.90
Within VCE type: Delta-method

```

```

Expression   : Pr(dep_by_covid), predict(pr)
dy/dx w.r.t. : 1.hypertens_ever_diagn
1._at       : female           =      0
2._at       : female           =      1

```

|              | dy/dx          | Std. Err. | t    | P> t  | [95% Conf. Interval] |          |
|--------------|----------------|-----------|------|-------|----------------------|----------|
| -----+-----  |                |           |      |       |                      |          |
| 0.hyperten~n | (base outcome) |           |      |       |                      |          |
| -----+-----  |                |           |      |       |                      |          |
| 1.hyperten~n |                |           |      |       |                      |          |
| _at          |                |           |      |       |                      |          |
| 1            | .0005164       | .0061146  | 0.08 | 0.933 | -.0114733            | .0125061 |
| 2            | .0074105       | .0056873  | 1.30 | 0.193 | -.0037416            | .0185626 |

Note: dy/dx for factor levels is the discrete change from the base level.

```

Multiple-imputation estimates      Imputations      =      5
Average marginal effects         Number of obs    =    37,475
                                Average RVI      =    0.5286
                                Largest FMI       =    0.4701
DF adjustment:   Large sample    DF:   min       =    22.20
                                avg         =    46.12
                                max         =    70.05
Within VCE type: Delta-method

```

```

Expression   : Pr(dep_by_covid), predict(pr)
dy/dx w.r.t. : 1.cholester_ever_diagn
1._at       : female           =      0
2._at       : female           =      1

```

|              | dy/dx          | Std. Err. | t     | P> t  | [95% Conf. Interval] |          |
|--------------|----------------|-----------|-------|-------|----------------------|----------|
| -----+-----  |                |           |       |       |                      |          |
| 0.choleste~n | (base outcome) |           |       |       |                      |          |
| -----+-----  |                |           |       |       |                      |          |
| 1.choleste~n |                |           |       |       |                      |          |
| _at          |                |           |       |       |                      |          |
| 1            | -.0075636      | .0069788  | -1.08 | 0.282 | -.0214822            | .006355  |
| 2            | -.0012594      | .0074799  | -0.17 | 0.868 | -.0167635            | .0142447 |

Note: dy/dx for factor levels is the discrete change from the base level.

```

Multiple-imputation estimates      Imputations      =      5
Average marginal effects         Number of obs    =    37,475
                                Average RVI       =    0.9563
                                Largest FMI        =    0.6098
DF adjustment:  Large sample     DF:  min        =    13.02
                                avg          =    18.99
Within VCE type: Delta-method    max          =    24.96

```

```

Expression : Pr(dep_by_covid), predict(pr)
dy/dx w.r.t. : 1.alzheimer_ever_diagn
1._at      : female          =      0
2._at      : female          =      1

```

|              | dy/dx          | Std. Err. | t     | P> t  | [95% Conf. Interval] |          |
|--------------|----------------|-----------|-------|-------|----------------------|----------|
| -----        |                |           |       |       |                      |          |
| 0.alzheime~n | (base outcome) |           |       |       |                      |          |
| -----        |                |           |       |       |                      |          |
| 1.alzheime~n |                |           |       |       |                      |          |
| _at          |                |           |       |       |                      |          |
| 1            | -.0209842      | .019358   | -1.08 | 0.298 | -.0627967            | .0208284 |
| 2            | -.0278813      | .0158476  | -1.76 | 0.091 | -.0605226            | .00476   |

Note: dy/dx for factor levels is the discrete change from the base level.

```

Multiple-imputation estimates      Imputations      =      5
Average marginal effects         Number of obs    =    37,475
                                Average RVI       =    0.0514
                                Largest FMI        =    0.0618
DF adjustment:  Large sample     DF:  min        =    1,106.55
                                avg          =    1,978.04
Within VCE type: Delta-method    max          =    2,849.53

```

```

Expression : Pr(dep_by_covid), predict(pr)
dy/dx w.r.t. : 1.affect_dis_ever_diagn
1._at      : female          =      0
2._at      : female          =      1

```

|              | dy/dx          | Std. Err. | t    | P> t  | [95% Conf. Interval] |          |
|--------------|----------------|-----------|------|-------|----------------------|----------|
| -----        |                |           |      |       |                      |          |
| 0.affect_d~n | (base outcome) |           |      |       |                      |          |
| -----        |                |           |      |       |                      |          |
| 1.affect_d~n |                |           |      |       |                      |          |
| _at          |                |           |      |       |                      |          |
| 1            | .0436591       | .0124504  | 3.51 | 0.000 | .0192464             | .0680718 |
| 2            | .0483503       | .008795   | 5.50 | 0.000 | .0310935             | .0656071 |

Note: dy/dx for factor levels is the discrete change from the base level.

```

Multiple-imputation estimates      Imputations      =      5
Average marginal effects         Number of obs    =    37,475
                                Average RVI       =    0.1180
                                Largest FMI        =    0.1664
DF adjustment:  Large sample     DF:  min        =    163.79
                                avg          =    884.94
Within VCE type: Delta-method    max          =    1,606.09

```

```

Expression : Pr(dep_by_covid), predict(pr)
dy/dx w.r.t. : 1.art_rheum_ever_diagn
1._at      : female          =      0
2._at      : female          =      1

```

|              | dy/dx          | Std. Err. | t     | P> t  | [95% Conf. Interval] |          |
|--------------|----------------|-----------|-------|-------|----------------------|----------|
| -----        |                |           |       |       |                      |          |
| 0.art_rheu~n | (base outcome) |           |       |       |                      |          |
| -----        |                |           |       |       |                      |          |
| 1.art_rheu~n |                |           |       |       |                      |          |
| _at          |                |           |       |       |                      |          |
| 1            | -.0045106      | .009246   | -0.49 | 0.626 | -.022646             | .0136249 |
| 2            | .0061427       | .0075711  | 0.81  | 0.418 | -.0088069            | .0210923 |

Note: dy/dx for factor levels is the discrete change from the base level.

```

Multiple-imputation estimates      Imputations      =          5
Average marginal effects          Number of obs     =       37,475
                                   Average RVI         =        0.1572
                                   Largest FMI         =        0.1488
DF adjustment:  Large sample      DF:   min        =       202.91
                                   avg          =       219.41
                                   max          =       235.90
Within VCE type: Delta-method

```

```

Expression   : Pr(dep_by_covid), predict(pr)
dy/dx w.r.t. : 1.osteart_ever_diagn
1._at       : female           =          0
2._at       : female           =          1

```

|             | dy/dx          | Std. Err. | t    | P> t  | [95% Conf. Interval] |          |
|-------------|----------------|-----------|------|-------|----------------------|----------|
| -----       |                |           |      |       |                      |          |
| 0.osteart~n | (base outcome) |           |      |       |                      |          |
| -----       |                |           |      |       |                      |          |
| 1.osteart~n |                |           |      |       |                      |          |
| _at         |                |           |      |       |                      |          |
| 1           | .0164062       | .0079761  | 2.06 | 0.041 | .0006796             | .0321328 |
| 2           | .0145111       | .0062401  | 2.33 | 0.021 | .0022177             | .0268044 |

Note: dy/dx for factor levels is the discrete change from the base level.

```

Multiple-imputation estimates      Imputations      =          5
Average marginal effects          Number of obs     =       37,475
                                   Average RVI         =        0.3333
                                   Largest FMI         =        0.3803
DF adjustment:  Large sample      DF:   min        =        33.69
                                   avg          =       147.08
                                   max          =       260.48
Within VCE type: Delta-method

```

```

Expression   : Pr(dep_by_covid), predict(pr)
dy/dx w.r.t. : 1.adl2
1._at       : female           =          0
2._at       : female           =          1

```

|        | dy/dx          | Std. Err. | t     | P> t  | [95% Conf. Interval] |          |
|--------|----------------|-----------|-------|-------|----------------------|----------|
| -----  |                |           |       |       |                      |          |
| 0.adl2 | (base outcome) |           |       |       |                      |          |
| -----  |                |           |       |       |                      |          |
| 1.adl2 |                |           |       |       |                      |          |
| _at    |                |           |       |       |                      |          |
| 1      | -.0044459      | .0115141  | -0.39 | 0.702 | -.0278534            | .0189616 |
| 2      | .0043155       | .0091179  | 0.47  | 0.636 | -.0136387            | .0222696 |

Note: dy/dx for factor levels is the discrete change from the base level.

```

Multiple-imputation estimates      Imputations      =          5
Average marginal effects          Number of obs     =       37,475
                                   Average RVI         =        0.8987
                                   Largest FMI         =        0.6809
DF adjustment:  Large sample      DF:   min        =        10.27
                                   avg          =       140.95
                                   max          =       271.64
Within VCE type: Delta-method

```

```

Expression   : Pr(dep_by_covid), predict(pr)
dy/dx w.r.t. : 1.iadl2
1._at       : female           =          0
2._at       : female           =          1

```

|         | dy/dx          | Std. Err. | t    | P> t  | [95% Conf. Interval] |          |
|---------|----------------|-----------|------|-------|----------------------|----------|
| -----   |                |           |      |       |                      |          |
| 0.iadl2 | (base outcome) |           |      |       |                      |          |
| -----   |                |           |      |       |                      |          |
| 1.iadl2 |                |           |      |       |                      |          |
| _at     |                |           |      |       |                      |          |
| 1       | .0276006       | .010042   | 2.75 | 0.006 | .0078306             | .0473707 |
| 2       | .0137057       | .0121209  | 1.13 | 0.284 | -.0132067            | .040618  |

Note: dy/dx for factor levels is the discrete change from the base level.

```

Multiple-imputation estimates      Imputations      =      5
Average marginal effects          Number of obs    =    37,475
                                   Average RVI        =     0.1614
                                   Largest FMI         =     0.2807
DF adjustment:   Large sample     DF:   min        =     60.41
                                   avg          =    640.86
Within VCE type: Delta-method     max          =   1,321.82

```

```

Expression   : Pr(dep_by_covid), predict(pr)
dy/dx w.r.t. : 2.bmi_class 3.bmi_class
1._at       : female           =      0
2._at       : female           =      1

```

|             | dy/dx          | Std. Err. | t     | P> t  | [95% Conf. Interval] |           |
|-------------|----------------|-----------|-------|-------|----------------------|-----------|
| -----       |                |           |       |       |                      |           |
| 1.bmi_class | (base outcome) |           |       |       |                      |           |
| -----       |                |           |       |       |                      |           |
| 2.bmi_class |                |           |       |       |                      |           |
| _at         |                |           |       |       |                      |           |
| 1           | -.0048702      | .0066568  | -0.73 | 0.465 | -.0179514            | .008211   |
| 2           | -.0041201      | .0068381  | -0.60 | 0.549 | -.0177964            | .0095562  |
| -----       |                |           |       |       |                      |           |
| 3.bmi_class |                |           |       |       |                      |           |
| _at         |                |           |       |       |                      |           |
| 1           | .0021385       | .0081878  | 0.26  | 0.794 | -.0139239            | .0182009  |
| 2           | -.016157       | .0070293  | -2.30 | 0.022 | -.0299575            | -.0023564 |
| -----       |                |           |       |       |                      |           |

Note: dy/dx for factor levels is the discrete change from the base level.

```

Multiple-imputation estimates      Imputations      =      5
Average marginal effects          Number of obs    =    37,475
                                   Average RVI        =     0.4778
                                   Largest FMI         =     0.3595
DF adjustment:   Large sample     DF:   min        =     37.57
                                   avg          =     39.20
Within VCE type: Delta-method     max          =     40.84

```

```

Expression   : Pr(dep_by_covid), predict(pr)
dy/dx w.r.t. : fluency
1._at       : female           =      0
2._at       : female           =      1

```

|       | dy/dx     | Std. Err. | t     | P> t  | [95% Conf. Interval] |           |
|-------|-----------|-----------|-------|-------|----------------------|-----------|
| ----- |           |           |       |       |                      |           |
| _at   |           |           |       |       |                      |           |
| 1     | -.0007571 | .0005131  | -1.48 | 0.148 | -.0017963            | .000282   |
| 2     | -.0010654 | .0004877  | -2.18 | 0.035 | -.0020504            | -.0000803 |
| ----- |           |           |       |       |                      |           |

```

Multiple-imputation estimates      Imputations      =      5
Average marginal effects          Number of obs    =    37,475
                                   Average RVI        =     0.0106
                                   Largest FMI         =     0.0170
DF adjustment:   Large sample     DF:   min        =   14,000.31
                                   avg          =  125,825.89
Within VCE type: Delta-method     max          =  237,651.48

```

```

Expression   : Pr(dep_by_covid), predict(pr)
dy/dx w.r.t. : hhsize
1._at       : female           =      0
2._at       : female           =      1

```

|       | dy/dx     | Std. Err. | t     | P> t  | [95% Conf. Interval] |           |
|-------|-----------|-----------|-------|-------|----------------------|-----------|
| ----- |           |           |       |       |                      |           |
| _at   |           |           |       |       |                      |           |
| 1     | -.0043349 | .0038213  | -1.13 | 0.257 | -.0118253            | .0031554  |
| 2     | -.0130659 | .0035777  | -3.65 | 0.000 | -.0200781            | -.0060537 |
| ----- |           |           |       |       |                      |           |

```

Multiple-imputation estimates      Imputations      =      5
Average marginal effects          Number of obs    =    37,475
                                   Average RVI        =     0.0121
                                   Largest FMI         =     0.0167
DF adjustment:   Large sample     DF:   min        =   14,496.39
                                   avg          =   44,877.74
Within VCE type: Delta-method     max          =   75,259.10

```



| -----        |  |          |          |      |       |                    |
|--------------|--|----------|----------|------|-------|--------------------|
| 5.job_status |  |          |          |      |       |                    |
| _at          |  |          |          |      |       |                    |
| 1            |  | .0281105 | .0609    | 0.46 | 0.646 | -.0941574 .1503785 |
| 2            |  | .0044871 | .0151573 | 0.30 | 0.770 | -.0268398 .035814  |

Note: dy/dx for factor levels is the discrete change from the base level.

|                               |               |   |        |
|-------------------------------|---------------|---|--------|
| Multiple-imputation estimates | Imputations   | = | 5      |
| Average marginal effects      | Number of obs | = | 37,475 |
|                               | Average RVI   | = | 0.3330 |
|                               | Largest FMI   | = | 0.3741 |
| DF adjustment: Large sample   | DF: min       | = | 34.79  |
|                               | avg           | = | 124.90 |
| Within VCE type: Delta-method | max           | = | 291.09 |

Expression : Pr(dep\_by\_covid), predict(pr)  
dy/dx w.r.t. : 2.house\_owner 3.house\_owner  
1.\_at : female = 0  
2.\_at : female = 1

| -----                                        |  |          |          |      |       |                    |
|----------------------------------------------|--|----------|----------|------|-------|--------------------|
| dy/dx Std. Err. t P> t  [95% Conf. Interval] |  |          |          |      |       |                    |
| -----                                        |  |          |          |      |       |                    |
| 1.house_ow~r   (base outcome)                |  |          |          |      |       |                    |
| -----                                        |  |          |          |      |       |                    |
| 2.house_ow~r                                 |  |          |          |      |       |                    |
| _at                                          |  |          |          |      |       |                    |
| 1                                            |  | .0186614 | .0111468 | 1.67 | 0.103 | -.0039728 .0412956 |
| 2                                            |  | .0262502 | .0088772 | 2.96 | 0.004 | .008674 .0438264   |
| -----                                        |  |          |          |      |       |                    |
| 3.house_ow~r                                 |  |          |          |      |       |                    |
| _at                                          |  |          |          |      |       |                    |
| 1                                            |  | .0045608 | .0126354 | 0.36 | 0.718 | -.0203076 .0294291 |
| 2                                            |  | .0129624 | .011688  | 1.11 | 0.272 | -.010474 .0363987  |

Note: dy/dx for factor levels is the discrete change from the base level.

|                               |               |   |            |
|-------------------------------|---------------|---|------------|
| Multiple-imputation estimates | Imputations   | = | 5          |
| Average marginal effects      | Number of obs | = | 37,475     |
|                               | Average RVI   | = | 0.0037     |
|                               | Largest FMI   | = | 0.0066     |
| DF adjustment: Large sample   | DF: min       | = | 92,080.21  |
|                               | avg           | = | 3290119.99 |
| Within VCE type: Delta-method | max           | = | 6488159.78 |

Expression : Pr(dep\_by\_covid), predict(pr)  
dy/dx w.r.t. : 1.covid\_pos  
1.\_at : female = 0  
2.\_at : female = 1

| -----                                        |  |          |          |      |       |                    |
|----------------------------------------------|--|----------|----------|------|-------|--------------------|
| dy/dx Std. Err. t P> t  [95% Conf. Interval] |  |          |          |      |       |                    |
| -----                                        |  |          |          |      |       |                    |
| 0.covid_pos   (base outcome)                 |  |          |          |      |       |                    |
| -----                                        |  |          |          |      |       |                    |
| 1.covid_pos                                  |  |          |          |      |       |                    |
| _at                                          |  |          |          |      |       |                    |
| 1                                            |  | .0017912 | .0107795 | 0.17 | 0.868 | -.0193365 .0229189 |
| 2                                            |  | .0052193 | .0101501 | 0.51 | 0.607 | -.0146745 .025113  |

Note: dy/dx for factor levels is the discrete change from the base level.

|                               |               |   |            |
|-------------------------------|---------------|---|------------|
| Multiple-imputation estimates | Imputations   | = | 5          |
| Average marginal effects      | Number of obs | = | 37,475     |
|                               | Average RVI   | = | 0.0022     |
|                               | Largest FMI   | = | 0.0029     |
| DF adjustment: Large sample   | DF: min       | = | 486,974.22 |
|                               | avg           | = | 1127433.86 |
| Within VCE type: Delta-method | max           | = | 1767893.50 |

Expression : Pr(dep\_by\_covid), predict(pr)  
dy/dx w.r.t. : 1.covid\_neg  
1.\_at : female = 0  
2.\_at : female = 1

| -----                                        |  |  |  |  |  |  |
|----------------------------------------------|--|--|--|--|--|--|
| dy/dx Std. Err. t P> t  [95% Conf. Interval] |  |  |  |  |  |  |
| -----                                        |  |  |  |  |  |  |
| 0.covid_neg   (base outcome)                 |  |  |  |  |  |  |

| -----       |  |          |          |      |       |                   |
|-------------|--|----------|----------|------|-------|-------------------|
| 1.covid_neg |  |          |          |      |       |                   |
| _at         |  |          |          |      |       |                   |
| 1           |  | .0301844 | .0074717 | 4.04 | 0.000 | .0155402 .0448286 |
| 2           |  | .0438425 | .0067228 | 6.52 | 0.000 | .0306661 .0570188 |

Note: dy/dx for factor levels is the discrete change from the base level.

|                               |               |   |            |
|-------------------------------|---------------|---|------------|
| Multiple-imputation estimates | Imputations   | = | 5          |
| Average marginal effects      | Number of obs | = | 37,475     |
|                               | Average RVI   | = | 0.0028     |
|                               | Largest FMI   | = | 0.0045     |
| DF adjustment: Large sample   | DF: min       | = | 201,143.23 |
|                               | avg           | = | 1768884.33 |
| Within VCE type: Delta-method | max           | = | 3336625.44 |

Expression : Pr(dep\_by\_covid), predict(pr)  
dy/dx w.r.t. : 1.hosp\_covid  
1.\_at : female = 0  
2.\_at : female = 1

| -----        |  |                |           |      |       |                      |
|--------------|--|----------------|-----------|------|-------|----------------------|
|              |  | dy/dx          | Std. Err. | t    | P> t  | [95% Conf. Interval] |
| 0.hosp_covid |  | (base outcome) |           |      |       |                      |
| 1.hosp_covid |  |                |           |      |       |                      |
| _at          |  |                |           |      |       |                      |
| 1            |  | .0265448       | .0159711  | 1.66 | 0.097 | -.0047582 .0578478   |
| 2            |  | .0096568       | .0148323  | 0.65 | 0.515 | -.019414 .0387276    |

Note: dy/dx for factor levels is the discrete change from the base level.

|                               |               |   |            |
|-------------------------------|---------------|---|------------|
| Multiple-imputation estimates | Imputations   | = | 5          |
| Average marginal effects      | Number of obs | = | 37,475     |
|                               | Average RVI   | = | 0.0026     |
|                               | Largest FMI   | = | 0.0043     |
| DF adjustment: Large sample   | DF: min       | = | 217,535.01 |
|                               | avg           | = | 2298551.41 |
| Within VCE type: Delta-method | max           | = | 4379567.81 |

Expression : Pr(dep\_by\_covid), predict(pr)  
dy/dx w.r.t. : 1.die\_covid  
1.\_at : female = 0  
2.\_at : female = 1

| -----       |  |                |           |      |       |                      |
|-------------|--|----------------|-----------|------|-------|----------------------|
|             |  | dy/dx          | Std. Err. | t    | P> t  | [95% Conf. Interval] |
| 0.die_covid |  | (base outcome) |           |      |       |                      |
| 1.die_covid |  |                |           |      |       |                      |
| _at         |  |                |           |      |       |                      |
| 1           |  | .0287655       | .0159124  | 1.81 | 0.071 | -.0024225 .0599535   |
| 2           |  | .0350971       | .0167765  | 2.09 | 0.036 | .0022157 .0679786    |

Note: dy/dx for factor levels is the discrete change from the base level.

|                               |               |   |           |
|-------------------------------|---------------|---|-----------|
| Multiple-imputation estimates | Imputations   | = | 5         |
| Average marginal effects      | Number of obs | = | 37,475    |
|                               | Average RVI   | = | 0.0194    |
|                               | Largest FMI   | = | 0.0255    |
| DF adjustment: Large sample   | DF: min       | = | 6,293.68  |
|                               | avg           | = | 15,038.07 |
| Within VCE type: Delta-method | max           | = | 23,782.45 |

Expression : Pr(dep\_by\_covid), predict(pr)  
dy/dx w.r.t. : 1.no\_pers\_contact  
1.\_at : female = 0  
2.\_at : female = 1

| -----       |  |                |           |      |       |                      |
|-------------|--|----------------|-----------|------|-------|----------------------|
|             |  | dy/dx          | Std. Err. | t    | P> t  | [95% Conf. Interval] |
| 0.no_pers~t |  | (base outcome) |           |      |       |                      |
| 1.no_pers~t |  |                |           |      |       |                      |
| _at         |  |                |           |      |       |                      |
| 1           |  | .024247        | .0063718  | 3.81 | 0.000 | .0117561 .0367379    |
| 2           |  | .0271058       | .0058324  | 4.65 | 0.000 | .015674 .0385377     |

Note: dy/dx for factor levels is the discrete change from the base level.





```

Multiple-imputation estimates      Imputations      =          5
Average marginal effects          Number of obs    =       37,475
                                   Average RVI        =         0.0070
                                   Largest FMI         =         0.0076
DF adjustment:  Large sample      DF:  min         =       70,498.02
                                   avg                 =       89,969.90
                                   max                 =      109,441.78
Within VCE type: Delta-method

```

```

Expression   : Pr(dep_by_covid), predict(pr)
dy/dx w.r.t. : 1.financial_received
1._at       : female           =          0
2._at       : female           =          1

```

|              | dy/dx          | Std. Err. | t    | P> t  | [95% Conf. Interval] |          |
|--------------|----------------|-----------|------|-------|----------------------|----------|
| -----        |                |           |      |       |                      |          |
| 0.financia~d | (base outcome) |           |      |       |                      |          |
| -----        |                |           |      |       |                      |          |
| 1.financia~d |                |           |      |       |                      |          |
| _at          |                |           |      |       |                      |          |
| 1            | .0211183       | .0114023  | 1.85 | 0.064 | -.0012301            | .0434668 |
| 2            | .0189198       | .0108994  | 1.74 | 0.083 | -.0024428            | .0402824 |

Note: dy/dx for factor levels is the discrete change from the base level.

```

Multiple-imputation estimates      Imputations      =          5
Average marginal effects          Number of obs    =       37,475
                                   Average RVI        =         0.0094
                                   Largest FMI         =         0.0158
DF adjustment:  Large sample      DF:  min         =       16,359.10
                                   avg                 =      243,058.85
                                   max                 =       469,758.61
Within VCE type: Delta-method

```

```

Expression   : Pr(dep_by_covid), predict(pr)
dy/dx w.r.t. : 1.unempl_covid
1._at       : female           =          0
2._at       : female           =          1

```

|              | dy/dx          | Std. Err. | t    | P> t  | [95% Conf. Interval] |          |
|--------------|----------------|-----------|------|-------|----------------------|----------|
| -----        |                |           |      |       |                      |          |
| 0.unempl_c~d | (base outcome) |           |      |       |                      |          |
| -----        |                |           |      |       |                      |          |
| 1.unempl_c~d |                |           |      |       |                      |          |
| _at          |                |           |      |       |                      |          |
| 1            | .0649792       | .017758   | 3.66 | 0.000 | .0301716             | .0997868 |
| 2            | .0224487       | .0146245  | 1.54 | 0.125 | -.0062149            | .0511123 |

Note: dy/dx for factor levels is the discrete change from the base level.

```

Multiple-imputation estimates      Imputations      =          5
Average marginal effects          Number of obs    =       37,475
                                   Average RVI        =         0.0118
                                   Largest FMI         =         0.0117
DF adjustment:  Large sample      DF:  min         =       29,555.40
                                   avg                 =       30,121.08
                                   max                 =       30,686.75
Within VCE type: Delta-method

```

```

Expression   : Pr(dep_by_covid), predict(pr)
dy/dx w.r.t. : 1.never_left_home
1._at       : female           =          0
2._at       : female           =          1

```

|              | dy/dx          | Std. Err. | t     | P> t  | [95% Conf. Interval] |          |
|--------------|----------------|-----------|-------|-------|----------------------|----------|
| -----        |                |           |       |       |                      |          |
| 0.never_le~e | (base outcome) |           |       |       |                      |          |
| -----        |                |           |       |       |                      |          |
| 1.never_le~e |                |           |       |       |                      |          |
| _at          |                |           |       |       |                      |          |
| 1            | .0064004       | .0077406  | 0.83  | 0.408 | -.0087715            | .0215722 |
| 2            | -.0051695      | .0067519  | -0.77 | 0.444 | -.0184036            | .0080645 |

Note: dy/dx for factor levels is the discrete change from the base level.

```

Multiple-imputation estimates      Imputations      =      5
Average marginal effects         Number of obs    =    37,475
                                  Average RVI       =     0.0193
                                  Largest FMI        =     0.0293
DF adjustment:  Large sample      DF:  min        =    4,781.73
                                  avg          =   28,573.86
                                  max          =   52,366.00
Within VCE type: Delta-method

```

```

Expression   : Pr(dep_by_covid), predict(pr)
dy/dx w.r.t. : 1.change_illness
1._at       : female           =           0
2._at       : female           =           1

```

|              | dy/dx          | Std. Err. | t    | P> t  | [95% Conf. Interval] |          |
|--------------|----------------|-----------|------|-------|----------------------|----------|
| 0.change_i~s | (base outcome) |           |      |       |                      |          |
| 1.change_i~s |                |           |      |       |                      |          |
| _at          |                |           |      |       |                      |          |
| 1            | .0918736       | .0104471  | 8.79 | 0.000 | .0713926             | .1123546 |
| 2            | .0811337       | .0091331  | 8.88 | 0.000 | .0632328             | .0990345 |

Note: dy/dx for factor levels is the discrete change from the base level.





|                            |  |           |          |       |       |           |          |
|----------------------------|--|-----------|----------|-------|-------|-----------|----------|
| 1._1_lung_dis_ever_diagn   |  | .0101425  | .0085501 | 1.19  | 0.236 | -.0066154 | .0269004 |
| 1._1_hypertens_ever_diagn  |  | -.0016146 | .0056528 | -0.29 | 0.775 | -.012694  | .0094647 |
| 1._1_cholester_ever_diagn  |  | -.0040045 | .0058066 | -0.69 | 0.490 | -.0153853 | .0073763 |
| 1._1_alzheimer_ever_diagn  |  | -.0205965 | .0120526 | -1.71 | 0.087 | -.0442191 | .0030261 |
| 1._1_affect_dis_ever_diagn |  | .0407768  | .0119833 | 3.40  | 0.001 | .01729    | .0642635 |
| 1._1_art_rheum_ever_diagn  |  | -.008739  | .0082406 | -1.06 | 0.289 | -.0248903 | .0074124 |
| 1._1_osteart_ever_diagn    |  | .0245724  | .0074148 | 3.31  | 0.001 | .0100398  | .0391051 |
| 1._1_adl2                  |  | -.0069966 | .0087929 | -0.80 | 0.426 | -.0242303 | .0102371 |
| 1._1_iadl2                 |  | .0326994  | .0090363 | 3.62  | 0.000 | .0149887  | .0504102 |
| _1_bmi_class               |  |           |          |       |       |           |          |
| 2                          |  | -.0061223 | .0060554 | -1.01 | 0.312 | -.0179907 | .0057461 |
| 3                          |  | .0032275  | .0076475 | 0.42  | 0.673 | -.0117613 | .0182163 |
| _1_fluency                 |  | -.0001352 | .000399  | -0.34 | 0.735 | -.0009173 | .0006469 |
| hhsiz                      |  | -.0046095 | .0035523 | -1.30 | 0.194 | -.0115718 | .0023529 |
| 1.partner_hh               |  | -.0073527 | .0081092 | -0.91 | 0.365 | -.0232464 | .0085409 |
| _1_child_class             |  |           |          |       |       |           |          |
| 2                          |  | .0149834  | .0097736 | 1.53  | 0.125 | -.0041726 | .0341394 |
| 3                          |  | .0100191  | .0086136 | 1.16  | 0.245 | -.0068633 | .0269015 |
| _1_job_status              |  |           |          |       |       |           |          |
| 2                          |  | .0083801  | .0145821 | 0.57  | 0.566 | -.0202003 | .0369605 |
| 3                          |  | .011752   | .0103489 | 1.14  | 0.256 | -.0085314 | .0320354 |
| 4                          |  | .014897   | .0146033 | 1.02  | 0.308 | -.013725  | .043519  |
| 5                          |  | .0145893  | .0485123 | 0.30  | 0.764 | -.0804932 | .1096717 |
| _1_house_owner             |  |           |          |       |       |           |          |
| 2                          |  | .0237484  | .0089017 | 2.67  | 0.008 | .0063013  | .0411955 |
| 3                          |  | -.0000263 | .0115654 | -0.00 | 0.998 | -.022694  | .0226414 |
| 1.covid_pos                |  | .0032159  | .0103304 | 0.31  | 0.756 | -.0170312 | .0234631 |
| 1.covid_neg                |  | .0310352  | .007373  | 4.21  | 0.000 | .0165843  | .045486  |
| 1.hosp_covid               |  | .0252996  | .0152307 | 1.66  | 0.097 | -.004552  | .0551513 |
| 1.die_covid                |  | .0259901  | .0150867 | 1.72  | 0.085 | -.0035794 | .0555595 |
| 1.no_pers_contact          |  | .0231703  | .0059029 | 3.93  | 0.000 | .0116007  | .0347398 |
| 1.no_soc_contact           |  | -.006338  | .0096621 | -0.66 | 0.512 | -.0252754 | .0125995 |
| 1.help_given               |  | .0026209  | .0078682 | 0.33  | 0.739 | -.0128005 | .0180424 |
| 1.help_received            |  | .047038   | .00724   | 6.50  | 0.000 | .0328479  | .0612281 |
| 1.financial_received       |  | .0118306  | .0114253 | 1.04  | 0.300 | -.0105627 | .0342238 |
| 1.unempl_covid             |  | .0597221  | .0167299 | 3.57  | 0.000 | .0269321  | .0925122 |
| 1.never_left_home          |  | .0020535  | .0072632 | 0.28  | 0.777 | -.012182  | .016289  |
| 1.change_illness           |  | .088876   | .010022  | 8.87  | 0.000 | .0692332  | .1085188 |
| country                    |  |           |          |       |       |           |          |
| Germany                    |  | .0419238  | .0118361 | 3.54  | 0.000 | .0187254  | .0651222 |
| Sweden                     |  | .0388768  | .014753  | 2.64  | 0.008 | .0099614  | .0677922 |
| Spain                      |  | .1163147  | .0167927 | 6.93  | 0.000 | .0834016  | .1492278 |
| Italy                      |  | .1455227  | .0145105 | 10.03 | 0.000 | .1170827  | .1739627 |
| France                     |  | .058645   | .0145508 | 4.03  | 0.000 | .030126   | .087164  |
| Denmark                    |  | .0060854  | .0121087 | 0.50  | 0.615 | -.0176472 | .0298179 |
| Greece                     |  | .1004127  | .0137005 | 7.33  | 0.000 | .0735601  | .1272653 |
| Switzerland                |  | .0317619  | .0131004 | 2.42  | 0.015 | .0060855  | .0574383 |
| Belgium                    |  | .0603077  | .0113309 | 5.32  | 0.000 | .0380994  | .0825159 |
| Israel                     |  | .0657571  | .0189636 | 3.47  | 0.001 | .0285892  | .1029251 |
| Czech Republic             |  | .0022811  | .0111994 | 0.20  | 0.839 | -.0196692 | .0242314 |
| Poland                     |  | .049765   | .0174595 | 2.85  | 0.004 | .015545   | .083985  |
| Luxembourg                 |  | .0679498  | .0191222 | 3.55  | 0.000 | .030471   | .1054287 |
| Slovenia                   |  | .0250485  | .0129959 | 1.93  | 0.054 | -.0004229 | .05052   |
| Estonia                    |  | .0541475  | .0119416 | 4.53  | 0.000 | .0307425  | .0775526 |
| Croatia                    |  | .0559523  | .0148839 | 3.76  | 0.000 | .0267804  | .0851241 |

-----  
Note: dy/dx for factor levels is the discrete change from the base level.







|                            |  |           |          |       |       |           |           |
|----------------------------|--|-----------|----------|-------|-------|-----------|-----------|
| 1._1_lung_dis_ever_diagn   |  | .0057741  | .0094363 | 0.61  | 0.541 | -.0127208 | .0242689  |
| 1._1_hypertens_ever_diagn  |  | .0100554  | .0060233 | 1.67  | 0.095 | -.00175   | .0218609  |
| 1._1_cholester_ever_diagn  |  | .0003562  | .0061714 | 0.06  | 0.954 | -.0117396 | .012452   |
| 1._1_alzheimer_ever_diagn  |  | -.0295335 | .0133151 | -2.22 | 0.027 | -.0556305 | -.0034364 |
| 1._1_affect_dis_ever_diagn |  | .051866   | .0090699 | 5.72  | 0.000 | .0340893  | .0696427  |
| 1._1_art_rheum_ever_diagn  |  | .0056375  | .0075046 | 0.75  | 0.453 | -.0090712 | .0203462  |
| 1._1_osteart_ever_diagn    |  | .0163735  | .0062807 | 2.61  | 0.009 | .0040635  | .0286835  |
| 1._1_adl2                  |  | .0023468  | .0091354 | 0.26  | 0.797 | -.0155582 | .0202518  |
| 1._1_iadl2                 |  | .0117263  | .0079059 | 1.48  | 0.138 | -.003769  | .0272217  |
| 1_bmi_class                |  |           |          |       |       |           |           |
| 2                          |  | -.0067295 | .0063838 | -1.05 | 0.292 | -.0192415 | .0057825  |
| 3                          |  | -.0194045 | .0073114 | -2.65 | 0.008 | -.0337346 | -.0050745 |
| 1_fluency                  |  | -.0014128 | .0004432 | -3.19 | 0.001 | -.0022815 | -.0005442 |
| hhsiz                      |  | -.0146538 | .0039479 | -3.71 | 0.000 | -.0223916 | -.0069161 |
| 1.partner_hh               |  | .0104283  | .0072415 | 1.44  | 0.150 | -.0037647 | .0246214  |
| 1_child_class              |  |           |          |       |       |           |           |
| 2                          |  | .0214018  | .0101793 | 2.10  | 0.036 | .0014508  | .0413528  |
| 3                          |  | .0160996  | .0091505 | 1.76  | 0.079 | -.001835  | .0340341  |
| 1_job_status               |  |           |          |       |       |           |           |
| 2                          |  | -.0302241 | .0211667 | -1.43 | 0.153 | -.0717101 | .0112619  |
| 3                          |  | -.001641  | .0111604 | -0.15 | 0.883 | -.023515  | .020233   |
| 4                          |  | .0097535  | .0150984 | 0.65  | 0.518 | -.0198388 | .0393457  |
| 5                          |  | .0061743  | .0126302 | 0.49  | 0.625 | -.0185805 | .0309292  |
| 1_house_owner              |  |           |          |       |       |           |           |
| 2                          |  | .0291117  | .0088127 | 3.30  | 0.001 | .0118391  | .0463844  |
| 3                          |  | .004283   | .0106719 | 0.40  | 0.688 | -.0166336 | .0251996  |
| 1.covid_pos                |  | .0064681  | .0109236 | 0.59  | 0.554 | -.0149417 | .0278779  |
| 1.covid_neg                |  | .0459269  | .0073079 | 6.28  | 0.000 | .0316036  | .0602502  |
| 1.hosp_covid               |  | .0043628  | .0155883 | 0.28  | 0.780 | -.0261897 | .0349153  |
| 1.die_covid                |  | .0412088  | .0180664 | 2.28  | 0.023 | .0057993  | .0766183  |
| 1.no_pers_contact          |  | .0291943  | .0062559 | 4.67  | 0.000 | .0169329  | .0414556  |
| 1.no_soc_contact           |  | -.0816004 | .0121421 | -6.72 | 0.000 | -.1053984 | -.0578024 |
| 1.help_given               |  | .0161676  | .0080272 | 2.01  | 0.044 | .0004347  | .0319006  |
| 1.help_received            |  | .0691058  | .0067047 | 10.31 | 0.000 | .0559649  | .0822468  |
| 1.financial_received       |  | .0248863  | .0123016 | 2.02  | 0.043 | .0007756  | .048997   |
| 1.unempl_covid             |  | .0204087  | .0154439 | 1.32  | 0.186 | -.0098607 | .0506781  |
| 1.never_left_home          |  | -.0037814 | .0073706 | -0.51 | 0.608 | -.0182274 | .0106647  |
| 1.change_illness           |  | .0855746  | .0096382 | 8.88  | 0.000 | .0666841  | .1044652  |
| country                    |  |           |          |       |       |           |           |
| Germany                    |  | .0511067  | .013599  | 3.76  | 0.000 | .0244531  | .0777602  |
| Sweden                     |  | .034967   | .0167738 | 2.08  | 0.037 | .0020909  | .0678431  |
| Spain                      |  | .1813477  | .018138  | 10.00 | 0.000 | .1457978  | .2168977  |
| Italy                      |  | .2035464  | .0156412 | 13.01 | 0.000 | .1728903  | .2342025  |
| France                     |  | .1360878  | .0163877 | 8.30  | 0.000 | .1039685  | .168207   |
| Denmark                    |  | .0047735  | .0144701 | 0.33  | 0.741 | -.0235874 | .0331345  |
| Greece                     |  | .1055455  | .014573  | 7.24  | 0.000 | .0769829  | .1341081  |
| Switzerland                |  | .0611085  | .0156398 | 3.91  | 0.000 | .0304551  | .091762   |
| Belgium                    |  | .1097384  | .0133486 | 8.22  | 0.000 | .0835756  | .1359011  |
| Israel                     |  | .0695383  | .0197484 | 3.52  | 0.000 | .030832   | .1082445  |
| Czech Republic             |  | .0170865  | .0131666 | 1.30  | 0.194 | -.0087196 | .0428926  |
| Poland                     |  | .0780633  | .0191563 | 4.08  | 0.000 | .0405177  | .1156089  |
| Luxembourg                 |  | .1103803  | .0221048 | 4.99  | 0.000 | .0670556  | .1537049  |
| Slovenia                   |  | .0020036  | .0137118 | 0.15  | 0.884 | -.024871  | .0288783  |
| Estonia                    |  | .0710068  | .0126308 | 5.62  | 0.000 | .0462508  | .0957627  |
| Croatia                    |  | .0410053  | .0159335 | 2.57  | 0.010 | .0097762  | .0722345  |

-----  
Note: dy/dx for factor levels is the discrete change from the base level.
